# Supplementary material
Source: Research Square preprint supplement (doi:10.21203/rs.3.rs-8597333/v1)
Supplement: Supplementary file 1 [file a305165126e55d0ba0d016b2.doc]

**SUPPLEMENTARY TABLE 1 A list of 331 GLP-targeted genes**

| No. | Target | No. | Target | No. | Target | No. | Target | No. | Target | No. | Target | No. | Target |
| --- | --- | --- | --- | --- | --- | --- | --- | --- | --- | --- | --- | --- | --- |
| 1 | ABCB1 | 49 | CDA | 97 | FOLH1 | 145 | HTR2C | 193 | MGAM | 241 | POLA1 | 289 | RIB1 |
| 2 | ABCB11 | 50 | CDC2 | 98 | FPGS | 146 | HTR6 | 194 | MGAML | 242 | PP2891 | 290 | RNASE1 |
| 3 | ACE | 51 | CDC25A | 99 | FUCA1 | 147 | IGF2R | 195 | MGEA5 | 243 | PP2CB | 291 | RNASE2 |
| 4 | AD3 | 52 | CDC25B | 100 | G250 | 148 | IL2 | 196 | MLNR | 244 | PPM1A | 292 | RNS1 |
| 5 | AD4 | 53 | CDC25HU2 | 101 | GASC1 | 149 | JARID1A | 197 | MMP2 | 245 | PPM1B | 293 | RNS2 |
| 6 | ADA | 54 | CDC28A | 102 | GBA | 150 | JARID1C | 198 | MMP8 | 246 | PPP1CC | 294 | RORC |
| 7 | ADA1 | 55 | CDD | 103 | GBA1 | 151 | JHDM1A | 199 | MN | 247 | PPP2CA | 295 | RORG |
| 8 | ADORA1 | 56 | CDK1 | 104 | GC | 152 | JHDM2C | 200 | MOR1 | 248 | PPP2R5A | 296 | RZRG |
| 9 | ADORA2 | 57 | CDKN1 | 105 | GGH | 153 | JHDM3A | 201 | MPRI | 249 | PPPM1A | 297 | SDR26C1 |
| 10 | ADORA2A | 58 | CES1 | 106 | GIG27 | 154 | JHDM3C | 202 | MTLR | 250 | PRKACA | 298 | SDR9C3 |
| 11 | ADRA1A | 59 | CES2 | 107 | GLRA1 | 155 | JHDM3D | 203 | MTLR1 | 251 | PRKCA | 299 | SES1 |
| 12 | ADRA1C | 60 | CGI-78 | 108 | GLRA2 | 156 | JMJD1C | 204 | NAALAD1 | 252 | PRKCB | 300 | SGLT2 |
| 13 | ADRA1D | 61 | CLG1 | 109 | GLUC | 157 | JMJD2 | 205 | NAALAD2 | 253 | PRKCB1 | 301 | SI |
| 14 | ADRA2A | 62 | CLG4A | 110 | GMA | 158 | JMJD2A | 206 | NAT1 | 254 | PRKCD | 302 | SLC5A2 |
| 15 | ADRA2B | 63 | CPA | 111 | GPR109A | 159 | JMJD2C | 207 | Nbla10230 | 255 | PRKCE | 303 | SLC6A2 |
| 16 | ADRA2C | 64 | CPA1 | 112 | GPR38 | 160 | JMJD2D | 208 | NCSTN | 256 | PRKCG | 304 | SLC6A5 |
| 17 | ADRA2L1 | 65 | CPP32 | 113 | HCA2 | 161 | KCNH2 | 209 | NET1 | 257 | PRKCH | 305 | SMCX |
| 18 | ADRA2L2 | 66 | CXXC8 | 114 | HCAR2 | 162 | KDM2A | 210 | NIACR1 | 258 | PRKCL | 306 | SSTR1 |
| 19 | ADRA2R | 67 | CYP2D6 | 115 | HCC7 | 163 | KDM4A | 211 | NPC1L1 | 259 | PRKCQ | 307 | SSTR2 |
| 20 | ADRA2RL1 | 68 | CYP2DL1 | 116 | HEP | 164 | KDM4C | 212 | NR1F3 | 260 | PRKCT | 308 | SSTR3 |
| 21 | ADRA2RL2 | 69 | DAMOX | 117 | HERG | 165 | KDM4D | 213 | NR1I1 | 261 | PRO1141 | 309 | SSTR4 |
| 22 | ADRAR | 70 | DAO | 118 | HEXA | 166 | KDM4DL | 214 | NR3A2 | 262 | PRO1328 | 310 | SSTR5 |
| 23 | AKR1B1 | 71 | DCP | 119 | HEXB | 167 | KDM4E | 215 | NRU | 263 | PRO1335 | 311 | STAT3 |
| 24 | ALDR1 | 72 | DCP1 | 120 | HEXC | 168 | KDM5A | 216 | OGA | 264 | PRO19605 | 312 | STM2 |
| 25 | ALR2 | 73 | DDO | 121 | HM74A | 169 | KDM5C | 217 | OPRK | 265 | PRO4317 | 313 | TLR4 |
| 26 | AMY2A | 74 | DPDE3 | 122 | HPA | 170 | KDR | 218 | OPRK1 | 266 | PS1 | 314 | TLR9 |
| 27 | APH1A | 75 | DRD1 | 123 | HPA1 | 171 | KIAA0253 | 219 | OPRM1 | 267 | PS2 | 315 | TRIP8 |
| 28 | APH1B | 76 | DRD2 | 124 | HPR1 | 172 | KIAA0677 | 220 | P2RU1 | 268 | PSEN1 | 316 | TRPV1 |
| 29 | APRF | 77 | DRD3 | 125 | HPSE | 173 | KIAA0679 | 221 | P2RY2 | 269 | PSEN2 | 317 | TYR |
| 30 | ATP1A1 | 78 | DXS1272E | 126 | HPSE1 | 174 | KIAA0780 | 222 | P2RY4 | 270 | PSENEN | 318 | UNQ1874 |
| 31 | ATX | 79 | EDG2 | 127 | HRAS | 175 | KIAA1004 | 223 | P2RY6 | 271 | PSF | 319 | UNQ579 |
| 32 | BCL2L | 80 | EDG4 | 128 | HRAS1 | 176 | KIAA1111 | 224 | P34CDC2 | 272 | PSFL | 320 | UNQ5798 |
| 33 | BCL2L1 | 81 | EDN | 129 | HSD11 | 177 | KIAA1380 | 225 | P4HTM | 273 | PSM | 321 | UNQ688 |
| 34 | BCLX | 82 | ENPP2 | 130 | HSD11B1 | 178 | LGALS3 | 226 | PAFR | 274 | PSMA | 322 | UNQ690 |
| 35 | BSEP | 83 | ERG | 131 | HSD11B2 | 179 | LGALS4 | 227 | PDE4D | 275 | PSNL1 | 323 | VDR |
| 36 | CA1 | 84 | ERG1 | 132 | HSD11K | 180 | LGALS8 | 228 | PDNP2 | 276 | PSNL2 | 324 | VEGF |
| 37 | CA12 | 85 | ESR2 | 133 | HSD11L | 181 | LGALS9 | 229 | PEN2 | 277 | PTAFR | 325 | VEGFA |
| 38 | CA13 | 86 | ESTRB | 134 | HSE1 | 182 | LIG1 | 230 | PGY1 | 278 | PTP1B | 326 | VEGFR2 |
| 39 | CA14 | 87 | FBL11 | 135 | HSP90A | 183 | LPA1 | 231 | PH4 | 279 | PTPB | 327 | VR1 |
| 40 | CA2 | 88 | FBL7 | 136 | HSP90AA1 | 184 | LPA2 | 232 | PHF8 | 280 | PTPN1 | 328 | XE169 |
| 41 | CA4 | 89 | FBXL11 | 137 | HSPC1 | 185 | LPAR1 | 233 | PIN1 | 281 | PTPN2 | 329 | YARS |
| 42 | CA5 | 90 | FDFT1 | 138 | HSPCA | 186 | LPAR2 | 234 | PKCA | 282 | PTPRB | 330 | YARS1 |
| 43 | CA5A | 91 | FGF1 | 139 | HTR1B | 187 | MAC2 | 235 | PKCB | 283 | PTPT | 331 | ZNF422 |
| 44 | CA5B | 92 | FGF2 | 140 | HTR1C | 188 | MAG | 236 | PKCD | 284 | PYGB |  |  |
| 45 | CA6 | 93 | FGFA | 141 | HTR1DB | 189 | MDR1 | 237 | PKCE | 285 | PYGL |  |  |
| 46 | CA7 | 94 | FGFB | 142 | HTR2 | 190 | MDS033 | 238 | PKCG | 286 | PYGM |  |  |
| 47 | CA9 | 95 | FLK1 | 143 | HTR2A | 191 | MEA5 | 239 | PKCL | 287 | RBBP2 |  |  |
| 48 | CASP3 | 96 | FOLH | 144 | HTR2B | 192 | MGA | 240 | POLA | 288 | RBP2 |  |  |

**SUPPLEMENTARY TABLE 2 A list of 56 candidate genes**

| No. | Target | No. | Target | No. | Target | No. | Target | No. | Target | No. | Target | No. | Target |
| --- | --- | --- | --- | --- | --- | --- | --- | --- | --- | --- | --- | --- | --- |
| 1 | TLR4 | 9 | LIG1 | 17 | VEGFA | 25 | ADORA2A | 33 | KCNH2 | 41 | MMP8 | 49 | RBP2 |
| 2 | HSD11B1 | 10 | GC | 18 | HTR2B | 26 | FGF2 | 34 | MGAM | 42 | KDM4E | 50 | CA1 |
| 3 | KDR | 11 | DAO | 19 | PPP1CC | 27 | HRAS | 35 | HPSE | 43 | CPA1 | 51 | CA7 |
| 4 | PSEN1 | 12 | CDC25B | 20 | TRPV1 | 28 | FDFT1 | 36 | SSTR2 | 44 | VDR | 52 | MLNR |
| 5 | GBA | 13 | P4HTM | 21 | PRKCE | 29 | ADRA1A | 37 | CA4 | 45 | MMP2 | 53 | SSTR4 |
| 6 | LPAR2 | 14 | SSTR1 | 22 | P2RY2 | 30 | HTR2A | 38 | DRD1 | 46 | ADRA2C | 54 | GLRA2 |
| 7 | KDM4A | 15 | NCSTN | 23 | PHF8 | 31 | ADRA2A | 39 | SLC5A2 | 47 | CA9 | 55 | HTR2C |
| 8 | DDO | 16 | CES1 | 24 | ESR2 | 32 | TLR9 | 40 | PYGM | 48 | HTR6 | 56 | SI |

**SUPPLEMENTARY TABLE 3 A list of 989 GO terms**

|  | Category | ID | term | Genes | pvalue |
| --- | --- | --- | --- | --- | --- |
| GO:0043410 | BP | GO:0043410 | positive regulation of MAPK cascade | TLR4,KDR,LPAR2,VEGFA,HTR2B,PRKCE,FGF2,HRAS,ADRA1A,HTR2A,ADRA2A,TLR9,ADRA2C,SSTR4,HTR2C | 3.80319222728873e-12 |
| GO:0007187 | BP | GO:0007187 | G protein-coupled receptor signaling pathway, coupled to cyclic nucleotide second messenger | SSTR1,HTR2B,HTR2A,SSTR2,DRD1,HTR6,SSTR4,HTR2C | 3.90550067293492e-12 |
| GO:0008227 | MF | GO:0008227 | G protein-coupled amine receptor activity | HTR2B,ADRA1A,HTR2A,ADRA2A,ADRA2C,HTR6,HTR2C | 1.97738757638689e-11 |
| GO:0006816 | BP | GO:0006816 | calcium ion transport | PSEN1,HTR2B,TRPV1,PRKCE,ADORA2A,FGF2,ADRA1A,HTR2A,ADRA2A,TLR9,DRD1,VDR,HTR2C | 3.45655319783742e-10 |
| GO:0035296 | BP | GO:0035296 | regulation of tube diameter | HTR2B,P2RY2,ADORA2A,ADRA1A,HTR2A,ADRA2A,DRD1,MMP2,ADRA2C | 3.64089307460964e-10 |
| GO:0097746 | BP | GO:0097746 | blood vessel diameter maintenance | HTR2B,P2RY2,ADORA2A,ADRA1A,HTR2A,ADRA2A,DRD1,MMP2,ADRA2C | 3.64089307460964e-10 |
| GO:0035150 | BP | GO:0035150 | regulation of tube size | HTR2B,P2RY2,ADORA2A,ADRA1A,HTR2A,ADRA2A,DRD1,MMP2,ADRA2C | 3.8698000481408e-10 |
| GO:0006939 | BP | GO:0006939 | smooth muscle contraction | HTR2B,TRPV1,ADRA1A,HTR2A,ADRA2A,SSTR2,DRD1,ADRA2C | 9.28548127467193e-10 |
| GO:0010863 | BP | GO:0010863 | positive regulation of phospholipase C activity | LPAR2,HTR2B,FGF2,HRAS,ADRA1A,HTR2A | 1.00383861904271e-09 |
| GO:1900274 | BP | GO:1900274 | regulation of phospholipase C activity | LPAR2,HTR2B,FGF2,HRAS,ADRA1A,HTR2A | 1.40253006477178e-09 |
| GO:0070588 | BP | GO:0070588 | calcium ion transmembrane transport | PSEN1,HTR2B,TRPV1,PRKCE,FGF2,ADRA1A,HTR2A,ADRA2A,TLR9,DRD1,HTR2C | 4.68006952633802e-09 |
| GO:0003018 | BP | GO:0003018 | vascular process in circulatory system | VEGFA,HTR2B,P2RY2,ADORA2A,ADRA1A,HTR2A,ADRA2A,DRD1,MMP2,ADRA2C | 4.87784996190574e-09 |
| GO:0010518 | BP | GO:0010518 | positive regulation of phospholipase activity | LPAR2,HTR2B,FGF2,HRAS,ADRA1A,HTR2A | 5.87883160904141e-09 |
| GO:0051208 | BP | GO:0051208 | sequestering of calcium ion | PSEN1,HTR2B,TRPV1,PRKCE,FGF2,HTR2A,DRD1,HTR2C | 8.05218305647212e-09 |
| GO:0070374 | BP | GO:0070374 | positive regulation of ERK1 and ERK2 cascade | TLR4,KDR,HTR2B,FGF2,HRAS,ADRA1A,HTR2A,SSTR4,HTR2C | 1.24648797846027e-08 |
| GO:0010517 | BP | GO:0010517 | regulation of phospholipase activity | LPAR2,HTR2B,FGF2,HRAS,ADRA1A,HTR2A | 1.85247482382896e-08 |
| GO:0060193 | BP | GO:0060193 | positive regulation of lipase activity | LPAR2,HTR2B,FGF2,HRAS,ADRA1A,HTR2A | 2.0537228159918e-08 |
| GO:0070372 | BP | GO:0070372 | regulation of ERK1 and ERK2 cascade | TLR4,KDR,HTR2B,FGF2,HRAS,ADRA1A,HTR2A,TLR9,SSTR4,HTR2C | 2.06420049395408e-08 |
| GO:0055074 | BP | GO:0055074 | calcium ion homeostasis | KDR,PSEN1,HTR2B,TRPV1,PRKCE,FGF2,HTR2A,DRD1,VDR,HTR2C | 3.49881581041154e-08 |
| GO:0007200 | BP | GO:0007200 | phospholipase C-activating G protein-coupled receptor signaling pathway | HTR2B,P2RY2,ADRA1A,HTR2A,ADRA2A,DRD1,HTR2C | 3.66431325955655e-08 |
| GO:0070371 | BP | GO:0070371 | ERK1 and ERK2 cascade | TLR4,KDR,HTR2B,FGF2,HRAS,ADRA1A,HTR2A,TLR9,SSTR4,HTR2C | 4.02874134559579e-08 |
| GO:1903351 | BP | GO:1903351 | cellular response to dopamine | NCSTN,HTR2B,HTR2A,DRD1,HTR6,HTR2C | 6.78377122866231e-08 |
| GO:1903350 | BP | GO:1903350 | response to dopamine | NCSTN,HTR2B,HTR2A,DRD1,HTR6,HTR2C | 7.36590387470836e-08 |
| GO:0032230 | BP | GO:0032230 | positive regulation of synaptic transmission, GABAergic | PRKCE,ADORA2A,ADRA1A,CA7 | 8.60753241992422e-08 |
| GO:0004089 | MF | GO:0004089 | carbonate dehydratase activity | CA4,CA9,CA1,CA7 | 9.3206990006765e-08 |
| GO:0060191 | BP | GO:0060191 | regulation of lipase activity | LPAR2,HTR2B,FGF2,HRAS,ADRA1A,HTR2A | 1.01222360050479e-07 |
| GO:0051209 | BP | GO:0051209 | release of sequestered calcium ion into cytosol | HTR2B,TRPV1,PRKCE,FGF2,HTR2A,DRD1,HTR2C | 1.31543942627484e-07 |
| GO:0097553 | BP | GO:0097553 | calcium ion transmembrane import into cytosol | HTR2B,TRPV1,PRKCE,FGF2,ADRA1A,HTR2A,DRD1,HTR2C | 1.33006293673459e-07 |
| GO:0051283 | BP | GO:0051283 | negative regulation of sequestering of calcium ion | HTR2B,TRPV1,PRKCE,FGF2,HTR2A,DRD1,HTR2C | 1.38317995654377e-07 |
| GO:0042310 | BP | GO:0042310 | vasoconstriction | HTR2B,ADRA1A,HTR2A,ADRA2A,MMP2,ADRA2C | 1.47099311500326e-07 |
| GO:0051282 | BP | GO:0051282 | regulation of sequestering of calcium ion | HTR2B,TRPV1,PRKCE,FGF2,HTR2A,DRD1,HTR2C | 1.52752580460432e-07 |
| GO:0071868 | BP | GO:0071868 | cellular response to monoamine stimulus | NCSTN,HTR2B,HTR2A,DRD1,HTR6,HTR2C | 1.95055469826545e-07 |
| GO:0071870 | BP | GO:0071870 | cellular response to catecholamine stimulus | NCSTN,HTR2B,HTR2A,DRD1,HTR6,HTR2C | 1.95055469826545e-07 |
| GO:0043406 | BP | GO:0043406 | positive regulation of MAP kinase activity | TLR4,VEGFA,HTR2B,FGF2,HRAS,ADRA2A | 2.08861805601637e-07 |
| GO:0071867 | BP | GO:0071867 | response to monoamine | NCSTN,HTR2B,HTR2A,DRD1,HTR6,HTR2C | 2.38890193554275e-07 |
| GO:0071869 | BP | GO:0071869 | response to catecholamine | NCSTN,HTR2B,HTR2A,DRD1,HTR6,HTR2C | 2.38890193554275e-07 |
| GO:0006874 | BP | GO:0006874 | intracellular calcium ion homeostasis | PSEN1,HTR2B,TRPV1,PRKCE,FGF2,HTR2A,DRD1,VDR,HTR2C | 2.40735297608372e-07 |
| GO:0042060 | BP | GO:0042060 | wound healing | TLR4,KDR,VEGFA,PRKCE,ADORA2A,FGF2,HRAS,ADRA2A,HPSE,ADRA2C | 3.42306850310203e-07 |
| GO:0042734 | CC | GO:0042734 | presynaptic membrane | PSEN1,LPAR2,NCSTN,ADORA2A,HTR2A,ADRA2A,DRD1 | 3.460153718825e-07 |
| GO:0007189 | BP | GO:0007189 | adenylate cyclase-activating G protein-coupled receptor signaling pathway | LPAR2,ADORA2A,ADRA1A,ADRA2A,DRD1,ADRA2C,SSTR4 | 3.65757707170689e-07 |
| GO:0051952 | BP | GO:0051952 | regulation of amine transport | PSEN1,ADORA2A,HTR2A,ADRA2A,DRD1,ADRA2C | 3.73281381024619e-07 |
| GO:0051651 | BP | GO:0051651 | maintenance of location in cell | PSEN1,HTR2B,TRPV1,PRKCE,FGF2,HTR2A,DRD1,HTR2C | 4.02797474386337e-07 |
| GO:0030594 | MF | GO:0030594 | neurotransmitter receptor activity | HTR2B,HTR2A,DRD1,HTR6,GLRA2,HTR2C | 4.73194522868099e-07 |
| GO:0004993 | MF | GO:0004993 | G protein-coupled serotonin receptor activity | HTR2B,HTR2A,HTR6,HTR2C | 4.91835365688263e-07 |
| GO:0098664 | BP | GO:0098664 | G protein-coupled serotonin receptor signaling pathway | HTR2B,HTR2A,HTR6,HTR2C | 5.48804691279956e-07 |
| GO:0007188 | BP | GO:0007188 | adenylate cyclase-modulating G protein-coupled receptor signaling pathway | LPAR2,ADORA2A,ADRA1A,ADRA2A,SSTR2,DRD1,ADRA2C,SSTR4 | 5.68065813445347e-07 |
| GO:0003012 | BP | GO:0003012 | muscle system process | KDM4A,HTR2B,TRPV1,ADRA1A,HTR2A,ADRA2A,KCNH2,SSTR2,DRD1,ADRA2C | 6.27646873438568e-07 |
| GO:0061900 | BP | GO:0061900 | glial cell activation | PSEN1,TRPV1,ADORA2A,TLR9,MMP8 | 6.51597846603221e-07 |
| GO:0051235 | BP | GO:0051235 | maintenance of location | PSEN1,CES1,HTR2B,TRPV1,PRKCE,FGF2,HTR2A,DRD1,HTR2C | 7.03070434944522e-07 |
| GO:0015837 | BP | GO:0015837 | amine transport | PSEN1,ADORA2A,HTR2A,ADRA2A,DRD1,ADRA2C | 7.05338539282041e-07 |
| GO:0006936 | BP | GO:0006936 | muscle contraction | HTR2B,TRPV1,ADRA1A,HTR2A,ADRA2A,KCNH2,SSTR2,DRD1,ADRA2C | 7.19975262247058e-07 |
| GO:0050878 | BP | GO:0050878 | regulation of body fluid levels | TLR4,VEGFA,PRKCE,P2RY2,ADORA2A,ADRA2A,HPSE,VDR,ADRA2C | 9.96440300468156e-07 |
| GO:0071880 | BP | GO:0071880 | adenylate cyclase-activating adrenergic receptor signaling pathway | ADRA1A,ADRA2A,DRD1,ADRA2C | 1.07832345568146e-06 |
| GO:0099589 | MF | GO:0099589 | serotonin receptor activity | HTR2B,HTR2A,HTR6,HTR2C | 1.16705354059421e-06 |
| GO:0019229 | BP | GO:0019229 | regulation of vasoconstriction | ADRA1A,HTR2A,ADRA2A,MMP2,ADRA2C | 1.16832264089621e-06 |
| GO:0097060 | CC | GO:0097060 | synaptic membrane | PSEN1,LPAR2,NCSTN,TRPV1,ADORA2A,HTR2A,ADRA2A,DRD1,GLRA2 | 1.19504515615594e-06 |
| GO:0007202 | BP | GO:0007202 | activation of phospholipase C activity | LPAR2,HTR2B,ADRA1A,HTR2A | 1.25532628824822e-06 |
| GO:0007210 | BP | GO:0007210 | serotonin receptor signaling pathway | HTR2B,HTR2A,HTR6,HTR2C | 1.25532628824822e-06 |
| GO:0050804 | BP | GO:0050804 | modulation of chemical synaptic transmission | PSEN1,NCSTN,PRKCE,ADORA2A,HRAS,ADRA1A,HTR2A,ADRA2A,DRD1,CA7 | 1.28049295462837e-06 |
| GO:0099177 | BP | GO:0099177 | regulation of trans-synaptic signaling | PSEN1,NCSTN,PRKCE,ADORA2A,HRAS,ADRA1A,HTR2A,ADRA2A,DRD1,CA7 | 1.30429522927697e-06 |
| GO:0099171 | BP | GO:0099171 | presynaptic modulation of chemical synaptic transmission | ADORA2A,HTR2A,ADRA2A,DRD1 | 2.18572727485367e-06 |
| GO:0071875 | BP | GO:0071875 | adrenergic receptor signaling pathway | ADRA1A,ADRA2A,DRD1,ADRA2C | 2.48183508484068e-06 |
| GO:0051937 | BP | GO:0051937 | catecholamine transport | ADORA2A,HTR2A,ADRA2A,DRD1,ADRA2C | 2.7569082087542e-06 |
| GO:0071073 | BP | GO:0071073 | positive regulation of phospholipid biosynthetic process | HTR2B,HTR2A,HTR2C | 2.77126530792786e-06 |
| GO:0032228 | BP | GO:0032228 | regulation of synaptic transmission, GABAergic | PRKCE,ADORA2A,ADRA1A,CA7 | 3.16197971693263e-06 |
| GO:0071902 | BP | GO:0071902 | positive regulation of protein serine/threonine kinase activity | TLR4,VEGFA,HTR2B,FGF2,HRAS,ADRA2A | 3.22009834669781e-06 |
| GO:0043405 | BP | GO:0043405 | regulation of MAP kinase activity | TLR4,VEGFA,HTR2B,FGF2,HRAS,ADRA2A | 3.49597551683348e-06 |
| GO:0045834 | BP | GO:0045834 | positive regulation of lipid metabolic process | CES1,HTR2B,PRKCE,FGF2,HTR2A,HTR2C | 3.94563755082682e-06 |
| GO:0150076 | BP | GO:0150076 | neuroinflammatory response | PSEN1,TRPV1,ADORA2A,TLR9,MMP8 | 4.01806938917625e-06 |
| GO:0051378 | MF | GO:0051378 | serotonin binding | HTR2B,HTR2A,HTR2C | 4.03664860163347e-06 |
| GO:0071392 | BP | GO:0071392 | cellular response to estradiol stimulus | SSTR1,ESR2,SSTR2,MMP2 | 4.42881587487384e-06 |
| GO:0043176 | MF | GO:0043176 | amine binding | HTR2B,HTR2A,HTR2C | 5.37085648256361e-06 |
| GO:0048708 | BP | GO:0048708 | astrocyte differentiation | TLR4,PSEN1,KDM4A,ADORA2A,DRD1 | 5.38154356709728e-06 |
| GO:0006730 | BP | GO:0006730 | one-carbon metabolic process | CA4,CA9,CA1,CA7 | 5.45964340053987e-06 |
| GO:0033674 | BP | GO:0033674 | positive regulation of kinase activity | TLR4,KDR,VEGFA,HTR2B,FGF2,HRAS,ADRA2A,ADRA2C | 5.58288812616894e-06 |
| GO:0042063 | BP | GO:0042063 | gliogenesis | TLR4,PSEN1,KDM4A,NCSTN,PPP1CC,ADORA2A,FGF2,DRD1 | 5.70549156175755e-06 |
| GO:0015844 | BP | GO:0015844 | monoamine transport | ADORA2A,HTR2A,ADRA2A,DRD1,ADRA2C | 6.01872764276317e-06 |
| GO:0014061 | BP | GO:0014061 | regulation of norepinephrine secretion | ADORA2A,ADRA2A,ADRA2C | 6.56400625286037e-06 |
| GO:0048243 | BP | GO:0048243 | norepinephrine secretion | ADORA2A,ADRA2A,ADRA2C | 6.56400625286037e-06 |
| GO:1901338 | MF | GO:1901338 | catecholamine binding | ADRA2A,DRD1,ADRA2C | 6.96740179708238e-06 |
| GO:0014002 | BP | GO:0014002 | astrocyte development | TLR4,PSEN1,ADORA2A,DRD1 | 7.32487455808528e-06 |
| GO:0043279 | BP | GO:0043279 | response to alkaloid | TRPV1,PRKCE,ADORA2A,HTR2A,DRD1 | 7.46973804823706e-06 |
| GO:0051781 | BP | GO:0051781 | positive regulation of cell division | CDC25B,VEGFA,HTR2B,PRKCE,FGF2 | 7.871991135122e-06 |
| GO:0010001 | BP | GO:0010001 | glial cell differentiation | TLR4,PSEN1,KDM4A,NCSTN,ADORA2A,FGF2,DRD1 | 8.18931182671505e-06 |
| GO:1903727 | BP | GO:1903727 | positive regulation of phospholipid metabolic process | HTR2B,HTR2A,HTR2C | 8.33693741854248e-06 |
| GO:0032454 | MF | GO:0032454 | histone H3K9 demethylase activity | KDM4A,PHF8,KDM4E | 8.84891968818938e-06 |
| GO:1903522 | BP | GO:1903522 | regulation of blood circulation | TRPV1,ADRA1A,HTR2A,ADRA2A,KCNH2,MMP2,ADRA2C | 9.54587992257955e-06 |
| GO:2001028 | BP | GO:2001028 | positive regulation of endothelial cell chemotaxis | KDR,VEGFA,FGF2 | 1.03996529421283e-05 |
| GO:0050806 | BP | GO:0050806 | positive regulation of synaptic transmission | NCSTN,PRKCE,ADORA2A,ADRA1A,DRD1,CA7 | 1.12410690146337e-05 |
| GO:0098978 | CC | GO:0098978 | glutamatergic synapse | PSEN1,LPAR2,PPP1CC,ADORA2A,HRAS,HTR2A,ADRA2A,DRD1 | 1.50862933075148e-05 |
| GO:0071071 | BP | GO:0071071 | regulation of phospholipid biosynthetic process | HTR2B,HTR2A,HTR2C | 1.54782268300813e-05 |
| GO:0042116 | BP | GO:0042116 | macrophage activation | TLR4,TRPV1,PRKCE,TLR9,MMP8 | 1.69433585566567e-05 |
| GO:0045860 | BP | GO:0045860 | positive regulation of protein kinase activity | TLR4,VEGFA,HTR2B,FGF2,HRAS,ADRA2A,ADRA2C | 1.69820407161931e-05 |
| GO:0050433 | BP | GO:0050433 | regulation of catecholamine secretion | ADORA2A,HTR2A,ADRA2A,ADRA2C | 2.11963982304468e-05 |
| GO:0051932 | BP | GO:0051932 | synaptic transmission, GABAergic | PRKCE,ADORA2A,ADRA1A,CA7 | 2.4379204999711e-05 |
| GO:0051347 | BP | GO:0051347 | positive regulation of transferase activity | TLR4,KDR,VEGFA,HTR2B,FGF2,HRAS,ADRA2A,ADRA2C | 2.47742069780671e-05 |
| GO:0021782 | BP | GO:0021782 | glial cell development | TLR4,PSEN1,NCSTN,ADORA2A,DRD1 | 2.79463132086469e-05 |
| GO:0050432 | BP | GO:0050432 | catecholamine secretion | ADORA2A,HTR2A,ADRA2A,ADRA2C | 2.97929690895089e-05 |
| GO:0016706 | MF | GO:0016706 | 2-oxoglutarate-dependent dioxygenase activity | KDM4A,P4HTM,PHF8,KDM4E | 3.01517416864593e-05 |
| GO:0015695 | BP | GO:0015695 | organic cation transport | PSEN1,ADORA2A,ADRA2A,ADRA2C | 3.17789699002253e-05 |
| GO:0090303 | BP | GO:0090303 | positive regulation of wound healing | PRKCE,HRAS,ADRA2A,HPSE | 3.17789699002253e-05 |
| GO:0016836 | MF | GO:0016836 | hydro-lyase activity | CA4,CA9,CA1,CA7 | 3.21966538295279e-05 |
| GO:0009410 | BP | GO:0009410 | response to xenobiotic stimulus | HTR2B,ADORA2A,ADRA1A,HTR2A,KCNH2,DRD1,MMP2,CA9 | 3.46647370992373e-05 |
| GO:0015874 | BP | GO:0015874 | norepinephrine transport | ADORA2A,ADRA2A,ADRA2C | 3.46933831910401e-05 |
| GO:0042391 | BP | GO:0042391 | regulation of membrane potential | KDR,PSEN1,TRPV1,ADORA2A,ADRA1A,KCNH2,DRD1,GLRA2 | 3.8208319788284e-05 |
| GO:0061042 | BP | GO:0061042 | vascular wound healing | KDR,VEGFA,HPSE | 3.98150699660042e-05 |
| GO:0043271 | BP | GO:0043271 | negative regulation of monoatomic ion transport | PRKCE,HTR2A,ADRA2A,TLR9,KCNH2 | 4.22923784342862e-05 |
| GO:0061041 | BP | GO:0061041 | regulation of wound healing | PRKCE,FGF2,HRAS,ADRA2A,HPSE | 4.22923784342862e-05 |
| GO:0007586 | BP | GO:0007586 | digestion | TLR4,ADRA2A,TLR9,VDR,SI | 4.38348401229545e-05 |
| GO:0014821 | BP | GO:0014821 | phasic smooth muscle contraction | HTR2B,SSTR2,DRD1 | 4.54090595804062e-05 |
| GO:2001026 | BP | GO:2001026 | regulation of endothelial cell chemotaxis | KDR,VEGFA,FGF2 | 4.54090595804062e-05 |
| GO:0050817 | BP | GO:0050817 | coagulation | TLR4,PSEN1,ADORA2A,ADRA2A,HPSE,ADRA2C | 5.27807352870379e-05 |
| GO:0070851 | MF | GO:0070851 | growth factor receptor binding | PSEN1,NCSTN,VEGFA,FGF2,TLR9 | 5.5426406297817e-05 |
| GO:0019216 | BP | GO:0019216 | regulation of lipid metabolic process | CES1,HTR2B,PRKCE,FGF2,HTR2A,ADRA2A,HTR2C | 5.80690771581493e-05 |
| GO:0050951 | BP | GO:0050951 | sensory perception of temperature stimulus | TRPV1,HTR2A,ADRA2A | 6.52180229567473e-05 |
| GO:0002274 | BP | GO:0002274 | myeloid leukocyte activation | TLR4,PSEN1,TRPV1,PRKCE,TLR9,MMP8 | 7.00480830487555e-05 |
| GO:0050673 | BP | GO:0050673 | epithelial cell proliferation | KDR,PSEN1,NCSTN,VEGFA,HTR2B,FGF2,HRAS,VDR | 7.04664915294731e-05 |
| GO:0032890 | BP | GO:0032890 | regulation of organic acid transport | PSEN1,CES1,ADORA2A,SSTR4 | 7.46367915880269e-05 |
| GO:1903036 | BP | GO:1903036 | positive regulation of response to wounding | PRKCE,HRAS,ADRA2A,HPSE | 7.46367915880269e-05 |
| GO:0141052 | MF | GO:0141052 | histone H3 demethylase activity | KDM4A,PHF8,KDM4E | 7.7324827135129e-05 |
| GO:0016835 | MF | GO:0016835 | carbon-oxygen lyase activity | CA4,CA9,CA1,CA7 | 8.06022698558325e-05 |
| GO:0019842 | MF | GO:0019842 | vitamin binding | GC,P4HTM,PYGM,VDR,RBP2 | 8.23430031767358e-05 |
| GO:0051966 | BP | GO:0051966 | regulation of synaptic transmission, glutamatergic | PSEN1,ADORA2A,HTR2A,DRD1 | 8.25102482150746e-05 |
| GO:1902074 | BP | GO:1902074 | response to salt | NCSTN,TRPV1,PRKCE,P2RY2,HTR2A,TLR9,DRD1 | 8.88381929853495e-05 |
| GO:0001819 | BP | GO:0001819 | positive regulation of cytokine production | TLR4,PSEN1,HTR2B,HRAS,ADRA2A,TLR9,HPSE,MMP8 | 9.23397813438253e-05 |
| GO:0030902 | BP | GO:0030902 | hindbrain development | PSEN1,SSTR1,NCSTN,FGF2,SSTR2 | 9.30293460734125e-05 |
| GO:0032452 | MF | GO:0032452 | histone demethylase activity | KDM4A,PHF8,KDM4E | 9.54271637602129e-05 |
| GO:0140457 | MF | GO:0140457 | protein demethylase activity | KDM4A,PHF8,KDM4E | 9.54271637602129e-05 |
| GO:0001945 | BP | GO:0001945 | lymph vessel development | KDR,VEGFA,FGF2 | 9.93998431471642e-05 |
| GO:0035767 | BP | GO:0035767 | endothelial cell chemotaxis | KDR,VEGFA,FGF2 | 9.93998431471642e-05 |
| GO:0045211 | CC | GO:0045211 | postsynaptic membrane | TRPV1,ADORA2A,HTR2A,ADRA2A,DRD1,GLRA2 | 0.000108751675744501 |
| GO:0060055 | BP | GO:0060055 | angiogenesis involved in wound healing | KDR,VEGFA,HPSE | 0.00010945647582361 |
| GO:0016052 | BP | GO:0016052 | carbohydrate catabolic process | PSEN1,HTR2A,MGAM,PYGM,SI | 0.000111008042613715 |
| GO:0042923 | MF | GO:0042923 | neuropeptide binding | SSTR1,SSTR2,SSTR4 | 0.000116091104819154 |
| GO:0070528 | BP | GO:0070528 | protein kinase C signaling | VEGFA,HTR2B,ADRA1A | 0.00013151012713146 |
| GO:0007589 | BP | GO:0007589 | body fluid secretion | VEGFA,PRKCE,P2RY2,VDR | 0.000137029461732295 |
| GO:0033555 | BP | GO:0033555 | multicellular organismal response to stress | TRPV1,ADRA2A,DRD1,HTR2C | 0.000143020996766743 |
| GO:0090050 | BP | GO:0090050 | positive regulation of cell migration involved in sprouting angiogenesis | KDR,VEGFA,FGF2 | 0.000143542765951572 |
| GO:1903725 | BP | GO:1903725 | regulation of phospholipid metabolic process | HTR2B,HTR2A,HTR2C | 0.000143542765951572 |
| GO:1903034 | BP | GO:1903034 | regulation of response to wounding | PRKCE,FGF2,HRAS,ADRA2A,HPSE | 0.000146772702338996 |
| GO:1904063 | BP | GO:1904063 | negative regulation of cation transmembrane transport | PRKCE,ADRA2A,TLR9,KCNH2 | 0.000149199962148401 |
| GO:0010959 | BP | GO:0010959 | regulation of metal ion transport | PRKCE,ADORA2A,HTR2A,ADRA2A,TLR9,KCNH2,DRD1 | 0.000149406407169502 |
| GO:0051402 | BP | GO:0051402 | neuron apoptotic process | KDR,PSEN1,NCSTN,ADORA2A,HRAS,HTR2A | 0.000153259956231268 |
| GO:0051213 | MF | GO:0051213 | dioxygenase activity | KDM4A,P4HTM,PHF8,KDM4E | 0.0001678872243736 |
| GO:0030900 | BP | GO:0030900 | forebrain development | PSEN1,SSTR1,FGF2,SSTR2,DRD1,HTR6,SSTR4 | 0.000171443668494253 |
| GO:0071900 | BP | GO:0071900 | regulation of protein serine/threonine kinase activity | TLR4,VEGFA,HTR2B,FGF2,HRAS,ADRA2A | 0.000175405622240149 |
| GO:0001659 | BP | GO:0001659 | temperature homeostasis | TLR4,VEGFA,TRPV1,HTR2A,DRD1 | 0.000190764749118562 |
| GO:0051302 | BP | GO:0051302 | regulation of cell division | CDC25B,VEGFA,HTR2B,PRKCE,FGF2 | 0.000205743791600728 |
| GO:0034766 | BP | GO:0034766 | negative regulation of monoatomic ion transmembrane transport | PRKCE,ADRA2A,TLR9,KCNH2 | 0.000205803039794784 |
| GO:0043266 | BP | GO:0043266 | regulation of potassium ion transport | HTR2A,ADRA2A,KCNH2,DRD1 | 0.000222077192518839 |
| GO:0032451 | MF | GO:0032451 | demethylase activity | KDM4A,PHF8,KDM4E | 0.000227385643713865 |
| GO:0022600 | BP | GO:0022600 | digestive system process | TLR4,ADRA2A,TLR9,VDR | 0.000230552736212444 |
| GO:0021549 | BP | GO:0021549 | cerebellum development | PSEN1,SSTR1,NCSTN,SSTR2 | 0.000239258822643019 |
| GO:0005496 | MF | GO:0005496 | steroid binding | HSD11B1,GC,ESR2,VDR | 0.00023956669312221 |
| GO:0032760 | BP | GO:0032760 | positive regulation of tumor necrosis factor production | TLR4,PSEN1,TLR9,MMP8 | 0.000257377400161538 |
| GO:0015850 | BP | GO:0015850 | organic hydroxy compound transport | CES1,ADORA2A,HTR2A,ADRA2A,DRD1,ADRA2C | 0.000266544458960049 |
| GO:0006509 | BP | GO:0006509 | membrane protein ectodomain proteolysis | PSEN1,NCSTN,ADRA2A | 0.000285122342253102 |
| GO:0043268 | BP | GO:0043268 | positive regulation of potassium ion transport | ADRA2A,KCNH2,DRD1 | 0.000285122342253102 |
| GO:0015711 | BP | GO:0015711 | organic anion transport | PSEN1,CES1,TRPV1,ADORA2A,CA4,RBP2,SSTR4 | 0.000287518991143809 |
| GO:0007218 | BP | GO:0007218 | neuropeptide signaling pathway | SSTR1,SSTR2,SSTR4,GLRA2 | 0.000296544345224903 |
| GO:1903557 | BP | GO:1903557 | positive regulation of tumor necrosis factor superfamily cytokine production | TLR4,PSEN1,TLR9,MMP8 | 0.000296544345224903 |
| GO:0042596 | BP | GO:0042596 | fear response | ADRA2A,DRD1,HTR2C | 0.000304859273219233 |
| GO:0001938 | BP | GO:0001938 | positive regulation of endothelial cell proliferation | KDR,VEGFA,HTR2B,FGF2 | 0.000306968303257656 |
| GO:0035249 | BP | GO:0035249 | synaptic transmission, glutamatergic | PSEN1,ADORA2A,HTR2A,DRD1 | 0.000306968303257656 |
| GO:0032892 | BP | GO:0032892 | positive regulation of organic acid transport | PSEN1,ADORA2A,SSTR4 | 0.000325457146193967 |
| GO:0032355 | BP | GO:0032355 | response to estradiol | SSTR1,ESR2,SSTR2,MMP2 | 0.000328601291564825 |
| GO:0044703 | BP | GO:0044703 | multi-organism reproductive process | DDO,VEGFA,ADRA2A,VDR,MMP2 | 0.000329817919530819 |
| GO:0022037 | BP | GO:0022037 | metencephalon development | PSEN1,SSTR1,NCSTN,SSTR2 | 0.000339817911507094 |
| GO:0042311 | BP | GO:0042311 | vasodilation | ADORA2A,ADRA2A,DRD1 | 0.000346931799547711 |
| GO:0008188 | MF | GO:0008188 | neuropeptide receptor activity | SSTR1,SSTR2,SSTR4 | 0.000367731337476693 |
| GO:0051864 | MF | GO:0051864 | histone H3K36 demethylase activity | KDM4A,PHF8 | 0.000384766484126405 |
| GO:0001774 | BP | GO:0001774 | microglial cell activation | TRPV1,TLR9,MMP8 | 0.000392574042762624 |
| GO:0048167 | BP | GO:0048167 | regulation of synaptic plasticity | PSEN1,NCSTN,ADORA2A,HRAS,DRD1 | 0.000392788625071971 |
| GO:0044706 | BP | GO:0044706 | multi-multicellular organism process | DDO,VEGFA,ADRA2A,VDR,MMP2 | 0.00040986204038484 |
| GO:0050679 | BP | GO:0050679 | positive regulation of epithelial cell proliferation | KDR,VEGFA,HTR2B,FGF2,HRAS | 0.000427490922560434 |
| GO:0032874 | BP | GO:0032874 | positive regulation of stress-activated MAPK cascade | TLR4,VEGFA,HRAS,TLR9 | 0.00043965887352687 |
| GO:0048241 | BP | GO:0048241 | epinephrine transport | ADRA2A,ADRA2C | 0.000451105004671937 |
| GO:0070304 | BP | GO:0070304 | positive regulation of stress-activated protein kinase signaling cascade | TLR4,VEGFA,HRAS,TLR9 | 0.000467568287464348 |
| GO:0002269 | BP | GO:0002269 | leukocyte activation involved in inflammatory response | TRPV1,TLR9,MMP8 | 0.000468000537423328 |
| GO:0007596 | BP | GO:0007596 | blood coagulation | TLR4,ADORA2A,ADRA2A,HPSE,ADRA2C | 0.000483828471161078 |
| GO:0023061 | BP | GO:0023061 | signal release | PSEN1,PRKCE,ADORA2A,HTR2A,ADRA2A,ADRA2C,HTR2C | 0.000489439802956324 |
| GO:1904645 | BP | GO:1904645 | response to amyloid-beta | TLR4,PSEN1,MMP2 | 0.000495060038339401 |
| GO:0008528 | MF | GO:0008528 | G protein-coupled peptide receptor activity | SSTR1,SSTR2,MLNR,SSTR4 | 0.000519427143054979 |
| GO:0046942 | BP | GO:0046942 | carboxylic acid transport | PSEN1,CES1,TRPV1,ADORA2A,RBP2,SSTR4 | 0.000533785697271691 |
| GO:0005984 | BP | GO:0005984 | disaccharide metabolic process | MGAM,SI | 0.000540314068522732 |
| GO:0010459 | BP | GO:0010459 | negative regulation of heart rate | TRPV1,ADRA1A | 0.000540314068522732 |
| GO:0030432 | BP | GO:0030432 | peristalsis | SSTR2,DRD1 | 0.000540314068522732 |
| GO:0015849 | BP | GO:0015849 | organic acid transport | PSEN1,CES1,TRPV1,ADORA2A,RBP2,SSTR4 | 0.00054183513088 |
| GO:0007599 | BP | GO:0007599 | hemostasis | TLR4,ADORA2A,ADRA2A,HPSE,ADRA2C | 0.000556439609449911 |
| GO:0042886 | BP | GO:0042886 | amide transport | PSEN1,TRPV1,PRKCE,ADORA2A,ADRA2A,HTR2C | 0.000558217906520667 |
| GO:0043523 | BP | GO:0043523 | regulation of neuron apoptotic process | KDR,PSEN1,ADORA2A,HRAS,HTR2A | 0.000567446286570996 |
| GO:0006661 | BP | GO:0006661 | phosphatidylinositol biosynthetic process | HTR2B,FGF2,HTR2A,HTR2C | 0.000575236079180058 |
| GO:0001541 | BP | GO:0001541 | ovarian follicle development | KDR,VEGFA,MMP2 | 0.000582197667347478 |
| GO:0016798 | MF | GO:0016798 | hydrolase activity, acting on glycosyl bonds | TLR4,MGAM,HPSE,SI | 0.000619759140571323 |
| GO:0032490 | BP | GO:0032490 | detection of molecule of bacterial origin | TLR4,TLR9 | 0.000637359534389982 |
| GO:0033604 | BP | GO:0033604 | negative regulation of catecholamine secretion | ADRA2A,ADRA2C | 0.000637359534389982 |
| GO:0060134 | BP | GO:0060134 | prepulse inhibition | ADORA2A,DRD1 | 0.000637359534389982 |
| GO:0071361 | BP | GO:0071361 | cellular response to ethanol | PRKCE,GLRA2 | 0.000637359534389982 |
| GO:0001653 | MF | GO:0001653 | peptide receptor activity | SSTR1,SSTR2,MLNR,SSTR4 | 0.000637725606737088 |
| GO:0033619 | BP | GO:0033619 | membrane protein proteolysis | PSEN1,NCSTN,ADRA2A | 0.00067857704047107 |
| GO:0048148 | BP | GO:0048148 | behavioral response to cocaine | HTR2A,DRD1 | 0.000742196633885222 |
| GO:0006940 | BP | GO:0006940 | regulation of smooth muscle contraction | ADRA1A,ADRA2A,ADRA2C | 0.000748152377719628 |
| GO:0022029 | BP | GO:0022029 | telencephalon cell migration | PSEN1,DRD1,HTR6 | 0.000748152377719628 |
| GO:0015926 | MF | GO:0015926 | glucosidase activity | MGAM,SI | 0.000772165344630697 |
| GO:0051924 | BP | GO:0051924 | regulation of calcium ion transport | PRKCE,ADORA2A,ADRA2A,TLR9,DRD1 | 0.000809357964547888 |
| GO:0034763 | BP | GO:0034763 | negative regulation of transmembrane transport | PRKCE,ADRA2A,TLR9,KCNH2 | 0.000820155714962455 |
| GO:0016324 | CC | GO:0016324 | apical plasma membrane | PSEN1,TLR9,MGAM,CA4,SLC5A2,SI | 0.000836535428385577 |
| GO:0021885 | BP | GO:0021885 | forebrain cell migration | PSEN1,DRD1,HTR6 | 0.000860773427375101 |
| GO:0062013 | BP | GO:0062013 | positive regulation of small molecule metabolic process | PSEN1,CES1,PRKCE,HTR2A | 0.00088570759034315 |
| GO:0015800 | BP | GO:0015800 | acidic amino acid transport | PSEN1,TRPV1,ADORA2A | 0.000941515504608482 |
| GO:0002756 | BP | GO:0002756 | MyD88-independent toll-like receptor signaling pathway | TLR4,PRKCE | 0.000975067590430359 |
| GO:0051770 | BP | GO:0051770 | positive regulation of nitric-oxide synthase biosynthetic process | TLR4,KDR | 0.000975067590430359 |
| GO:0070254 | BP | GO:0070254 | mucus secretion | PRKCE,P2RY2 | 0.000975067590430359 |
| GO:0016641 | MF | GO:0016641 | oxidoreductase activity, acting on the CH-NH2 group of donors, oxygen as acceptor | DDO,DAO | 0.00101436266186673 |
| GO:0050918 | BP | GO:0050918 | positive chemotaxis | KDR,VEGFA,FGF2 | 0.00107138128794467 |
| GO:0046488 | BP | GO:0046488 | phosphatidylinositol metabolic process | HTR2B,FGF2,HTR2A,HTR2C | 0.00107847727807025 |
| GO:0002730 | BP | GO:0002730 | regulation of dendritic cell cytokine production | TLR4,TLR9 | 0.0011030128389104 |
| GO:0043129 | BP | GO:0043129 | surfactant homeostasis | KDR,VEGFA | 0.0011030128389104 |
| GO:0050965 | BP | GO:0050965 | detection of temperature stimulus involved in sensory perception of pain | TRPV1,HTR2A | 0.0011030128389104 |
| GO:0048754 | BP | GO:0048754 | branching morphogenesis of an epithelial tube | KDR,VEGFA,FGF2,VDR | 0.00110448285465972 |
| GO:0045121 | CC | GO:0045121 | membrane raft | KDR,PSEN1,ADRA1A,HTR2A,HPSE | 0.00114859185601905 |
| GO:0050678 | BP | GO:0050678 | regulation of epithelial cell proliferation | KDR,VEGFA,HTR2B,FGF2,HRAS,VDR | 0.00115231422718715 |
| GO:0098857 | CC | GO:0098857 | membrane microdomain | KDR,PSEN1,ADRA1A,HTR2A,HPSE | 0.00116652226523498 |
| GO:0018108 | BP | GO:0018108 | peptidyl-tyrosine phosphorylation | KDR,VEGFA,PRKCE,HTR2A,ADRA2A | 0.00123605898085056 |
| GO:0002371 | BP | GO:0002371 | dendritic cell cytokine production | TLR4,TLR9 | 0.00123857250253893 |
| GO:0007625 | BP | GO:0007625 | grooming behavior | DDO,DRD1 | 0.00123857250253893 |
| GO:0009313 | BP | GO:0009313 | oligosaccharide catabolic process | MGAM,SI | 0.00123857250253893 |
| GO:0038083 | BP | GO:0038083 | peptidyl-tyrosine autophosphorylation | KDR,VEGFA | 0.00123857250253893 |
| GO:0043116 | BP | GO:0043116 | negative regulation of vascular permeability | VEGFA,ADORA2A | 0.00123857250253893 |
| GO:0048569 | BP | GO:0048569 | post-embryonic animal organ development | KDR,VEGFA | 0.00123857250253893 |
| GO:0071318 | BP | GO:0071318 | cellular response to ATP | TRPV1,P2RY2 | 0.00123857250253893 |
| GO:0090036 | BP | GO:0090036 | regulation of protein kinase C signaling | VEGFA,ADRA1A | 0.00123857250253893 |
| GO:0032413 | BP | GO:0032413 | negative regulation of ion transmembrane transporter activity | PRKCE,ADRA2A,TLR9 | 0.00126140425026835 |
| GO:0051881 | BP | GO:0051881 | regulation of mitochondrial membrane potential | KDR,TRPV1,ADORA2A | 0.00126140425026835 |
| GO:0048786 | CC | GO:0048786 | presynaptic active zone | LPAR2,ADORA2A,ADRA2A | 0.0012670224552397 |
| GO:0018212 | BP | GO:0018212 | peptidyl-tyrosine modification | KDR,VEGFA,PRKCE,HTR2A,ADRA2A | 0.00127621506931074 |
| GO:0031690 | MF | GO:0031690 | adrenergic receptor binding | ADRA2A,ADRA2C | 0.00128838957149459 |
| GO:0043524 | BP | GO:0043524 | negative regulation of neuron apoptotic process | KDR,PSEN1,ADORA2A,HRAS | 0.00129900029444835 |
| GO:0002224 | BP | GO:0002224 | toll-like receptor signaling pathway | TLR4,PRKCE,TLR9 | 0.00131200419458519 |
| GO:0009251 | BP | GO:0009251 | glucan catabolic process | MGAM,PYGM | 0.00138170273711523 |
| GO:0060977 | BP | GO:0060977 | coronary vasculature morphogenesis | VEGFA,FGF2 | 0.00138170273711523 |
| GO:0043536 | BP | GO:0043536 | positive regulation of blood vessel endothelial cell migration | KDR,VEGFA,FGF2 | 0.00141700089009396 |
| GO:0010721 | BP | GO:0010721 | negative regulation of cell development | TLR4,PSEN1,KDM4A,VEGFA,TRPV1 | 0.00146898852139125 |
| GO:0032729 | BP | GO:0032729 | positive regulation of type II interferon production | TLR4,HRAS,TLR9 | 0.0014714210562496 |
| GO:0044042 | BP | GO:0044042 | glucan metabolic process | PPP1CC,MGAM,PYGM | 0.00152713783144041 |
| GO:0002755 | BP | GO:0002755 | MyD88-dependent toll-like receptor signaling pathway | TLR4,TLR9 | 0.00153235988127422 |
| GO:0051767 | BP | GO:0051767 | nitric-oxide synthase biosynthetic process | TLR4,KDR | 0.00153235988127422 |
| GO:0051769 | BP | GO:0051769 | regulation of nitric-oxide synthase biosynthetic process | TLR4,KDR | 0.00153235988127422 |
| GO:0043491 | BP | GO:0043491 | phosphatidylinositol 3-kinase/protein kinase B signal transduction | KDR,HTR2B,FGF2,HTR2A,HPSE | 0.00153778480729748 |
| GO:0030856 | BP | GO:0030856 | regulation of epithelial cell differentiation | VEGFA,FGF2,TLR9,VDR | 0.00154932439966996 |
| GO:0016638 | MF | GO:0016638 | oxidoreductase activity, acting on the CH-NH2 group of donors | DDO,DAO | 0.00159387331658994 |
| GO:0007204 | BP | GO:0007204 | positive regulation of cytosolic calcium ion concentration | LPAR2,TRPV1,ADRA1A,HTR2A | 0.00161680109789857 |
| GO:0051899 | BP | GO:0051899 | membrane depolarization | KDR,ADORA2A,KCNH2 | 0.00164250663798443 |
| GO:0090049 | BP | GO:0090049 | regulation of cell migration involved in sprouting angiogenesis | KDR,VEGFA,FGF2 | 0.00164250663798443 |
| GO:1903169 | BP | GO:1903169 | regulation of calcium ion transmembrane transport | PRKCE,ADRA2A,TLR9,DRD1 | 0.0016512956528144 |
| GO:0000272 | BP | GO:0000272 | polysaccharide catabolic process | MGAM,PYGM | 0.00169050045582435 |
| GO:0050961 | BP | GO:0050961 | detection of temperature stimulus involved in sensory perception | TRPV1,HTR2A | 0.00169050045582435 |
| GO:0045913 | BP | GO:0045913 | positive regulation of carbohydrate metabolic process | PSEN1,PRKCE,HTR2A | 0.00170218106929047 |
| GO:0010634 | BP | GO:0010634 | positive regulation of epithelial cell migration | KDR,VEGFA,PRKCE,FGF2 | 0.00172181698191067 |
| GO:0045177 | CC | GO:0045177 | apical part of cell | PSEN1,TLR9,MGAM,CA4,SLC5A2,SI | 0.0018176633346558 |
| GO:0003085 | BP | GO:0003085 | negative regulation of systemic arterial blood pressure | TRPV1,ADRA1A | 0.00185608116308768 |
| GO:0045821 | BP | GO:0045821 | positive regulation of glycolytic process | PSEN1,HTR2A | 0.00185608116308768 |
| GO:0001936 | BP | GO:0001936 | regulation of endothelial cell proliferation | KDR,VEGFA,HTR2B,FGF2 | 0.00190724261051418 |
| GO:0016705 | MF | GO:0016705 | oxidoreductase activity, acting on paired donors, with incorporation or reduction of molecular oxygen | KDM4A,P4HTM,PHF8,KDM4E | 0.00196916499272827 |
| GO:0030165 | MF | GO:0030165 | PDZ domain binding | PSEN1,LPAR2,SSTR2 | 0.00199950220960561 |
| GO:0051222 | BP | GO:0051222 | positive regulation of protein transport | TLR4,PSEN1,PRKCE,ADORA2A,HRAS | 0.00200161040428526 |
| GO:0036303 | BP | GO:0036303 | lymph vessel morphogenesis | VEGFA,FGF2 | 0.00202905888624213 |
| GO:0051047 | BP | GO:0051047 | positive regulation of secretion | TLR4,PRKCE,P2RY2,ADORA2A,SSTR4 | 0.00205882678014795 |
| GO:0007565 | BP | GO:0007565 | female pregnancy | VEGFA,ADRA2A,VDR,MMP2 | 0.00210609356599489 |
| GO:0032640 | BP | GO:0032640 | tumor necrosis factor production | TLR4,PSEN1,TLR9,MMP8 | 0.00210609356599489 |
| GO:0032680 | BP | GO:0032680 | regulation of tumor necrosis factor production | TLR4,PSEN1,TLR9,MMP8 | 0.00210609356599489 |
| GO:0032872 | BP | GO:0032872 | regulation of stress-activated MAPK cascade | TLR4,VEGFA,HRAS,TLR9 | 0.00210609356599489 |
| GO:0061138 | BP | GO:0061138 | morphogenesis of a branching epithelium | KDR,VEGFA,FGF2,VDR | 0.00214751788433428 |
| GO:0032147 | BP | GO:0032147 | activation of protein kinase activity | VEGFA,ADRA2A,ADRA2C | 0.00215806276758792 |
| GO:0046330 | BP | GO:0046330 | positive regulation of JNK cascade | TLR4,HRAS,TLR9 | 0.00215806276758792 |
| GO:0030324 | BP | GO:0030324 | lung development | HSD11B1,KDR,VEGFA,FGF2 | 0.00218950267728981 |
| GO:1904062 | BP | GO:1904062 | regulation of monoatomic cation transmembrane transport | PRKCE,ADRA2A,TLR9,KCNH2,DRD1 | 0.0022071046738629 |
| GO:0016048 | BP | GO:0016048 | detection of temperature stimulus | TRPV1,HTR2A | 0.00220939068866592 |
| GO:0030277 | BP | GO:0030277 | maintenance of gastrointestinal epithelium | TLR4,TLR9 | 0.00220939068866592 |
| GO:0032727 | BP | GO:0032727 | positive regulation of interferon-alpha production | TLR4,TLR9 | 0.00220939068866592 |
| GO:0035162 | BP | GO:0035162 | embryonic hemopoiesis | KDR,VEGFA | 0.00220939068866592 |
| GO:0045822 | BP | GO:0045822 | negative regulation of heart contraction | TRPV1,ADRA1A | 0.00220939068866592 |
| GO:0051957 | BP | GO:0051957 | positive regulation of amino acid transport | PSEN1,ADORA2A | 0.00220939068866592 |
| GO:0046890 | BP | GO:0046890 | regulation of lipid biosynthetic process | CES1,HTR2B,HTR2A,HTR2C | 0.00223205183181064 |
| GO:0070302 | BP | GO:0070302 | regulation of stress-activated protein kinase signaling cascade | TLR4,VEGFA,HRAS,TLR9 | 0.00223205183181064 |
| GO:0046889 | BP | GO:0046889 | positive regulation of lipid biosynthetic process | HTR2B,HTR2A,HTR2C | 0.00230089538378888 |
| GO:0071706 | BP | GO:0071706 | tumor necrosis factor superfamily cytokine production | TLR4,PSEN1,TLR9,MMP8 | 0.00231885874034159 |
| GO:1903555 | BP | GO:1903555 | regulation of tumor necrosis factor superfamily cytokine production | TLR4,PSEN1,TLR9,MMP8 | 0.00231885874034159 |
| GO:0051051 | BP | GO:0051051 | negative regulation of transport | PRKCE,HTR2A,ADRA2A,TLR9,KCNH2,ADRA2C | 0.00236224106105899 |
| GO:0030323 | BP | GO:0030323 | respiratory tube development | HSD11B1,KDR,VEGFA,FGF2 | 0.00236312423477918 |
| GO:0048143 | BP | GO:0048143 | astrocyte activation | PSEN1,ADORA2A | 0.00239703381328424 |
| GO:0050927 | BP | GO:0050927 | positive regulation of positive chemotaxis | KDR,VEGFA | 0.00239703381328424 |
| GO:1903523 | BP | GO:1903523 | negative regulation of blood circulation | TRPV1,ADRA1A | 0.00239703381328424 |
| GO:0009755 | BP | GO:0009755 | hormone-mediated signaling pathway | SSTR1,ESR2,SSTR2,SSTR4 | 0.00240796957132901 |
| GO:1904951 | BP | GO:1904951 | positive regulation of establishment of protein localization | TLR4,PSEN1,PRKCE,ADORA2A,HRAS | 0.00249347737710754 |
| GO:0043123 | BP | GO:0043123 | positive regulation of canonical NF-kappaB signal transduction | TLR4,HTR2B,PRKCE,TLR9 | 0.0025460231223697 |
| GO:0032148 | BP | GO:0032148 | activation of protein kinase B activity | ADRA2A,ADRA2C | 0.00259194568191803 |
| GO:0050926 | BP | GO:0050926 | regulation of positive chemotaxis | KDR,VEGFA | 0.00259194568191803 |
| GO:0051894 | BP | GO:0051894 | positive regulation of focal adhesion assembly | KDR,VEGFA | 0.00259194568191803 |
| GO:0062149 | BP | GO:0062149 | detection of stimulus involved in sensory perception of pain | TRPV1,HTR2A | 0.00259194568191803 |
| GO:0098581 | BP | GO:0098581 | detection of external biotic stimulus | TLR4,TLR9 | 0.00259194568191803 |
| GO:0009791 | BP | GO:0009791 | post-embryonic development | KDR,PSEN1,VEGFA | 0.00260385867316268 |
| GO:0071229 | BP | GO:0071229 | cellular response to acid chemical | VEGFA,MMP2,GLRA2 | 0.00260385867316268 |
| GO:0004553 | MF | GO:0004553 | hydrolase activity, hydrolyzing O-glycosyl compounds | MGAM,HPSE,SI | 0.00267228316827556 |
| GO:0031406 | MF | GO:0031406 | carboxylic acid binding | P4HTM,VDR,RBP2,GLRA2 | 0.00268545444073514 |
| GO:1902075 | BP | GO:1902075 | cellular response to salt | NCSTN,TRPV1,P2RY2,TLR9 | 0.00268943349628071 |
| GO:0004190 | MF | GO:0004190 | aspartic-type endopeptidase activity | PSEN1,NCSTN | 0.00269538533903446 |
| GO:0016829 | MF | GO:0016829 | lyase activity | CA4,CA9,CA1,CA7 | 0.0027354142069004 |
| GO:0002042 | BP | GO:0002042 | cell migration involved in sprouting angiogenesis | KDR,VEGFA,FGF2 | 0.00276414345659623 |
| GO:0045666 | BP | GO:0045666 | positive regulation of neuron differentiation | KDM4A,FGF2,ADRA2C | 0.00276414345659623 |
| GO:0007626 | BP | GO:0007626 | locomotory behavior | PRKCE,ADORA2A,DRD1,HTR2C | 0.00278806730877547 |
| GO:0001964 | BP | GO:0001964 | startle response | ADORA2A,DRD1 | 0.00279408389463492 |
| GO:0007205 | BP | GO:0007205 | protein kinase C-activating G protein-coupled receptor signaling pathway | HTR2B,ADORA2A | 0.00279408389463492 |
| GO:0021895 | BP | GO:0021895 | cerebral cortex neuron differentiation | PSEN1,DRD1 | 0.00279408389463492 |
| GO:0001935 | BP | GO:0001935 | endothelial cell proliferation | KDR,VEGFA,HTR2B,FGF2 | 0.00283830367825307 |
| GO:0060562 | BP | GO:0060562 | epithelial tube morphogenesis | KDR,PSEN1,VEGFA,FGF2,VDR | 0.00284243989267575 |
| GO:0071214 | BP | GO:0071214 | cellular response to abiotic stimulus | TLR4,TRPV1,FGF2,HRAS,MMP2 | 0.00284243989267575 |
| GO:0104004 | BP | GO:0104004 | cellular response to environmental stimulus | TLR4,TRPV1,FGF2,HRAS,MMP2 | 0.00284243989267575 |
| GO:0031253 | CC | GO:0031253 | cell projection membrane | TRPV1,ADORA2A,CA4,DRD1,CA9 | 0.0028458824641133 |
| GO:0001763 | BP | GO:0001763 | morphogenesis of a branching structure | KDR,VEGFA,FGF2,VDR | 0.0028891580678069 |
| GO:0070001 | MF | GO:0070001 | aspartic-type peptidase activity | PSEN1,NCSTN | 0.00290548131940469 |
| GO:0006835 | BP | GO:0006835 | dicarboxylic acid transport | PSEN1,TRPV1,ADORA2A | 0.00293039666732866 |
| GO:0032410 | BP | GO:0032410 | negative regulation of transporter activity | PRKCE,ADRA2A,TLR9 | 0.00293039666732866 |
| GO:0048661 | BP | GO:0048661 | positive regulation of smooth muscle cell proliferation | TLR4,FGF2,MMP2 | 0.00293039666732866 |
| GO:0001963 | BP | GO:0001963 | synaptic transmission, dopaminergic | ADORA2A,DRD1 | 0.00300340622910246 |
| GO:0014047 | BP | GO:0014047 | glutamate secretion | TRPV1,ADORA2A | 0.00300340622910246 |
| GO:0045606 | BP | GO:0045606 | positive regulation of epidermal cell differentiation | FGF2,VDR | 0.00300340622910246 |
| GO:0051953 | BP | GO:0051953 | negative regulation of amine transport | ADRA2A,ADRA2C | 0.00300340622910246 |
| GO:1903672 | BP | GO:1903672 | positive regulation of sprouting angiogenesis | VEGFA,FGF2 | 0.00300340622910246 |
| GO:0003300 | BP | GO:0003300 | cardiac muscle hypertrophy | KDM4A,HTR2B,ADRA1A | 0.00301578415319146 |
| GO:0031667 | BP | GO:0031667 | response to nutrient levels | KDM4A,SSTR1,TRPV1,SSTR2,VDR,HTR2C | 0.00308723813955928 |
| GO:0048787 | CC | GO:0048787 | presynaptic active zone membrane | LPAR2,ADRA2A | 0.00310884688149182 |
| GO:0008585 | BP | GO:0008585 | female gonad development | KDR,VEGFA,MMP2 | 0.00319112534487868 |
| GO:0015697 | BP | GO:0015697 | quaternary ammonium group transport | PSEN1,ADORA2A | 0.00321987063994328 |
| GO:0032770 | BP | GO:0032770 | positive regulation of monooxygenase activity | HTR2B,VDR | 0.00321987063994328 |
| GO:0046474 | BP | GO:0046474 | glycerophospholipid biosynthetic process | HTR2B,FGF2,HTR2A,HTR2C | 0.00326275914491263 |
| GO:0002027 | BP | GO:0002027 | regulation of heart rate | TRPV1,ADRA1A,KCNH2 | 0.00328109650101079 |
| GO:0005976 | BP | GO:0005976 | polysaccharide metabolic process | PPP1CC,MGAM,PYGM | 0.00328109650101079 |
| GO:0014897 | BP | GO:0014897 | striated muscle hypertrophy | KDM4A,HTR2B,ADRA1A | 0.00328109650101079 |
| GO:0043177 | MF | GO:0043177 | organic acid binding | P4HTM,VDR,RBP2,GLRA2 | 0.00332777441356679 |
| GO:0001965 | MF | GO:0001965 | G-protein alpha-subunit binding | HTR2B,DRD1 | 0.0033479922879767 |
| GO:0001968 | MF | GO:0001968 | fibronectin binding | VEGFA,MMP2 | 0.0033479922879767 |
| GO:0097306 | BP | GO:0097306 | cellular response to alcohol | CES1,PRKCE,GLRA2 | 0.00337261281395474 |
| GO:0098739 | BP | GO:0098739 | import across plasma membrane | PSEN1,TRPV1,KCNH2,SLC5A2 | 0.00337527802519805 |
| GO:0009612 | BP | GO:0009612 | response to mechanical stimulus | TLR4,FGF2,HTR2A,MMP2 | 0.00343251862722524 |
| GO:0032607 | BP | GO:0032607 | interferon-alpha production | TLR4,TLR9 | 0.00344343525809261 |
| GO:0032647 | BP | GO:0032647 | regulation of interferon-alpha production | TLR4,TLR9 | 0.00344343525809261 |
| GO:0043032 | BP | GO:0043032 | positive regulation of macrophage activation | TLR4,MMP8 | 0.00344343525809261 |
| GO:0050820 | BP | GO:0050820 | positive regulation of coagulation | PSEN1,HPSE | 0.00344343525809261 |
| GO:0014896 | BP | GO:0014896 | muscle hypertrophy | KDM4A,HTR2B,ADRA1A | 0.00346568273448875 |
| GO:0002064 | BP | GO:0002064 | epithelial cell development | KDR,VEGFA,TLR9,HPSE | 0.00349041824631387 |
| GO:0060541 | BP | GO:0060541 | respiratory system development | HSD11B1,KDR,VEGFA,FGF2 | 0.00349041824631387 |
| GO:0046545 | BP | GO:0046545 | development of primary female sexual characteristics | KDR,VEGFA,MMP2 | 0.00356031460483983 |
| GO:0007631 | BP | GO:0007631 | feeding behavior | ADORA2A,DRD1,HTR2C | 0.00365651665934502 |
| GO:0060291 | BP | GO:0060291 | long-term synaptic potentiation | NCSTN,ADORA2A,DRD1 | 0.00365651665934502 |
| GO:0001975 | BP | GO:0001975 | response to amphetamine | ADORA2A,DRD1 | 0.00367405839015782 |
| GO:0150117 | BP | GO:0150117 | positive regulation of cell-substrate junction organization | KDR,VEGFA | 0.00367405839015782 |
| GO:2000273 | BP | GO:2000273 | positive regulation of signaling receptor activity | ADRA2A,ADRA2C | 0.00367405839015782 |
| GO:0060079 | BP | GO:0060079 | excitatory postsynaptic potential | TRPV1,ADORA2A,GLRA2 | 0.00375429702510962 |
| GO:0035590 | BP | GO:0035590 | purinergic nucleotide receptor signaling pathway | P2RY2,ADORA2A | 0.0039116985177801 |
| GO:0045684 | BP | GO:0045684 | positive regulation of epidermis development | FGF2,VDR | 0.0039116985177801 |
| GO:0045907 | BP | GO:0045907 | positive regulation of vasoconstriction | ADRA1A,HTR2A | 0.0039116985177801 |
| GO:1901020 | BP | GO:1901020 | negative regulation of calcium ion transmembrane transporter activity | ADRA2A,TLR9 | 0.0039116985177801 |
| GO:0019934 | BP | GO:0019934 | cGMP-mediated signaling | HTR2B,HTR2C | 0.00415631429699833 |
| GO:0033198 | BP | GO:0033198 | response to ATP | TRPV1,P2RY2 | 0.00415631429699833 |
| GO:0071222 | BP | GO:0071222 | cellular response to lipopolysaccharide | TLR4,PRKCE,TLR9,MMP8 | 0.00423794227542575 |
| GO:0030296 | MF | GO:0030296 | protein tyrosine kinase activator activity | VEGFA,HTR2A | 0.00432104953460363 |
| GO:0010669 | BP | GO:0010669 | epithelial structure maintenance | TLR4,TLR9 | 0.00440786455761501 |
| GO:0051403 | BP | GO:0051403 | stress-activated MAPK cascade | TLR4,VEGFA,HRAS,TLR9 | 0.00450940066990327 |
| GO:0050730 | BP | GO:0050730 | regulation of peptidyl-tyrosine phosphorylation | VEGFA,PRKCE,HTR2A,ADRA2A | 0.00457905637140905 |
| GO:0038187 | MF | GO:0038187 | pattern recognition receptor activity | TLR4,TLR9 | 0.00458239826143399 |
| GO:0099565 | BP | GO:0099565 | chemical synaptic transmission, postsynaptic | TRPV1,ADORA2A,GLRA2 | 0.00459429953872387 |
| GO:0006644 | BP | GO:0006644 | phospholipid metabolic process | HTR2B,FGF2,FDFT1,HTR2A,HTR2C | 0.00465075350376235 |
| GO:0051968 | BP | GO:0051968 | positive regulation of synaptic transmission, glutamatergic | ADORA2A,DRD1 | 0.00466630830256431 |
| GO:0008406 | BP | GO:0008406 | gonad development | KDR,VEGFA,TLR9,MMP2 | 0.00472054151278668 |
| GO:0001569 | BP | GO:0001569 | branching involved in blood vessel morphogenesis | KDR,VEGFA | 0.00493160470728225 |
| GO:0007617 | BP | GO:0007617 | mating behavior | DDO,DRD1 | 0.00493160470728225 |
| GO:1905332 | BP | GO:1905332 | positive regulation of morphogenesis of an epithelium | VEGFA,FGF2 | 0.00493160470728225 |
| GO:0032609 | BP | GO:0032609 | type II interferon production | TLR4,HRAS,TLR9 | 0.00505358442447963 |
| GO:0032649 | BP | GO:0032649 | regulation of type II interferon production | TLR4,HRAS,TLR9 | 0.00505358442447963 |
| GO:0031098 | BP | GO:0031098 | stress-activated protein kinase signaling cascade | TLR4,VEGFA,HRAS,TLR9 | 0.00508709559107927 |
| GO:0045137 | BP | GO:0045137 | development of primary sexual characteristics | KDR,VEGFA,TLR9,MMP2 | 0.00508709559107927 |
| GO:0071219 | BP | GO:0071219 | cellular response to molecule of bacterial origin | TLR4,PRKCE,TLR9,MMP8 | 0.00516263515343054 |
| GO:0046660 | BP | GO:0046660 | female sex differentiation | KDR,VEGFA,MMP2 | 0.00517257479169737 |
| GO:0002052 | BP | GO:0002052 | positive regulation of neuroblast proliferation | VEGFA,FGF2 | 0.00520371311907896 |
| GO:0043267 | BP | GO:0043267 | negative regulation of potassium ion transport | HTR2A,KCNH2 | 0.00520371311907896 |
| GO:0006813 | BP | GO:0006813 | potassium ion transport | HTR2A,ADRA2A,KCNH2,DRD1 | 0.00531597016957489 |
| GO:0005231 | MF | GO:0005231 | excitatory extracellular ligand-gated monoatomic ion channel activity | TRPV1,GLRA2 | 0.00540915162802449 |
| GO:0050767 | BP | GO:0050767 | regulation of neurogenesis | PSEN1,KDM4A,VEGFA,PPP1CC,FGF2 | 0.00548118896437383 |
| GO:0007212 | BP | GO:0007212 | dopamine receptor signaling pathway | NCSTN,DRD1 | 0.00548259305651305 |
| GO:0045429 | BP | GO:0045429 | positive regulation of nitric oxide biosynthetic process | TLR4,TRPV1 | 0.00548259305651305 |
| GO:0071404 | BP | GO:0071404 | cellular response to low-density lipoprotein particle stimulus | TLR4,CES1 | 0.00548259305651305 |
| GO:0007613 | BP | GO:0007613 | memory | PSEN1,HTR2A,DRD1 | 0.00553965933468981 |
| GO:0010811 | BP | GO:0010811 | positive regulation of cell-substrate adhesion | KDR,VEGFA,PRKCE | 0.00553965933468981 |
| GO:0045446 | BP | GO:0045446 | endothelial cell differentiation | KDR,VEGFA,HPSE | 0.00566541365817474 |
| GO:0002790 | BP | GO:0002790 | peptide secretion | TRPV1,PRKCE,ADRA2A,HTR2C | 0.00571262349204664 |
| GO:0043198 | CC | GO:0043198 | dendritic shaft | PSEN1,HTR2A | 0.00574751014398654 |
| GO:0001662 | BP | GO:0001662 | behavioral fear response | DRD1,HTR2C | 0.00576820420876804 |
| GO:0010762 | BP | GO:0010762 | regulation of fibroblast migration | PRKCE,FGF2 | 0.00576820420876804 |
| GO:0055094 | BP | GO:0055094 | response to lipoprotein particle | TLR4,CES1 | 0.00576820420876804 |
| GO:1904407 | BP | GO:1904407 | positive regulation of nitric oxide metabolic process | TLR4,TRPV1 | 0.00576820420876804 |
| GO:0031331 | BP | GO:0031331 | positive regulation of cellular catabolic process | KDR,PSEN1,HTR2A,ADRA2A,TLR9 | 0.00584109275163256 |
| GO:0003014 | BP | GO:0003014 | renal system process | TRPV1,ADORA2A,SLC5A2 | 0.0059220494997818 |
| GO:0045017 | BP | GO:0045017 | glycerolipid biosynthetic process | HTR2B,FGF2,HTR2A,HTR2C | 0.00604386102421463 |
| GO:0002209 | BP | GO:0002209 | behavioral defense response | DRD1,HTR2C | 0.0060605064350309 |
| GO:0009595 | BP | GO:0009595 | detection of biotic stimulus | TLR4,TLR9 | 0.0060605064350309 |
| GO:0032728 | BP | GO:0032728 | positive regulation of interferon-beta production | TLR4,TLR9 | 0.0060605064350309 |
| GO:1901617 | BP | GO:1901617 | organic hydroxy compound biosynthetic process | DAO,CES1,FGF2,FDFT1 | 0.00612863030453312 |
| GO:0071949 | MF | GO:0071949 | FAD binding | DDO,DAO | 0.00629906379094506 |
| GO:0042417 | BP | GO:0042417 | dopamine metabolic process | DAO,DRD1 | 0.00635945976387263 |
| GO:0050892 | BP | GO:0050892 | intestinal absorption | ADRA2A,VDR | 0.00635945976387263 |
| GO:0051954 | BP | GO:0051954 | positive regulation of amine transport | PSEN1,ADORA2A | 0.00635945976387263 |
| GO:0008654 | BP | GO:0008654 | phospholipid biosynthetic process | HTR2B,FGF2,HTR2A,HTR2C | 0.00638769356937901 |
| GO:0010595 | BP | GO:0010595 | positive regulation of endothelial cell migration | KDR,VEGFA,FGF2 | 0.00645600055990347 |
| GO:0042056 | MF | GO:0042056 | chemoattractant activity | VEGFA,FGF2 | 0.00660953774686377 |
| GO:0007595 | BP | GO:0007595 | lactation | VEGFA,VDR | 0.00666502439263098 |
| GO:0032733 | BP | GO:0032733 | positive regulation of interleukin-10 production | TLR4,TLR9 | 0.00666502439263098 |
| GO:0032941 | BP | GO:0032941 | secretion by tissue | PRKCE,P2RY2 | 0.00666502439263098 |
| GO:0071402 | BP | GO:0071402 | cellular response to lipoprotein particle stimulus | TLR4,CES1 | 0.00666502439263098 |
| GO:0046328 | BP | GO:0046328 | regulation of JNK cascade | TLR4,HRAS,TLR9 | 0.00673340989672864 |
| GO:0030168 | BP | GO:0030168 | platelet activation | TLR4,ADRA2A,ADRA2C | 0.00687474287807363 |
| GO:0030879 | BP | GO:0030879 | mammary gland development | VEGFA,FGF2,VDR | 0.00687474287807363 |
| GO:0019098 | BP | GO:0019098 | reproductive behavior | DDO,DRD1 | 0.00697716068679507 |
| GO:0032735 | BP | GO:0032735 | positive regulation of interleukin-12 production | TLR4,TLR9 | 0.00697716068679507 |
| GO:0051955 | BP | GO:0051955 | regulation of amino acid transport | PSEN1,ADORA2A | 0.00697716068679507 |
| GO:1904646 | BP | GO:1904646 | cellular response to amyloid-beta | TLR4,PSEN1 | 0.00697716068679507 |
| GO:0071695 | BP | GO:0071695 | anatomical structure maturation | KDR,CDC25B,VEGFA,MMP2 | 0.00702032232038217 |
| GO:0015833 | BP | GO:0015833 | peptide transport | TRPV1,PRKCE,ADRA2A,HTR2C | 0.00711396074199209 |
| GO:0043122 | BP | GO:0043122 | regulation of canonical NF-kappaB signal transduction | TLR4,HTR2B,PRKCE,TLR9 | 0.00739983823634228 |
| GO:0071216 | BP | GO:0071216 | cellular response to biotic stimulus | TLR4,PRKCE,TLR9,MMP8 | 0.00739983823634228 |
| GO:0098659 | BP | GO:0098659 | inorganic cation import across plasma membrane | TRPV1,KCNH2,SLC5A2 | 0.00745772347026921 |
| GO:0099587 | BP | GO:0099587 | inorganic ion import across plasma membrane | TRPV1,KCNH2,SLC5A2 | 0.00745772347026921 |
| GO:0050708 | BP | GO:0050708 | regulation of protein secretion | TLR4,PRKCE,ADORA2A,ADRA2A | 0.00749679495542287 |
| GO:0006775 | BP | GO:0006775 | fat-soluble vitamin metabolic process | GC,RBP2 | 0.0076209905703771 |
| GO:0030574 | BP | GO:0030574 | collagen catabolic process | MMP8,MMP2 | 0.0076209905703771 |
| GO:0030890 | BP | GO:0030890 | positive regulation of B cell proliferation | TLR4,TLR9 | 0.0076209905703771 |
| GO:0032768 | BP | GO:0032768 | regulation of monooxygenase activity | HTR2B,VDR | 0.0079526057260218 |
| GO:1900271 | BP | GO:1900271 | regulation of long-term synaptic potentiation | NCSTN,ADORA2A | 0.0079526057260218 |
| GO:0001101 | BP | GO:0001101 | response to acid chemical | VEGFA,MMP2,GLRA2 | 0.00806919056290589 |
| GO:0014075 | BP | GO:0014075 | response to amine | ADORA2A,DRD1 | 0.00829063567830953 |
| GO:0032467 | BP | GO:0032467 | positive regulation of cytokinesis | CDC25B,PRKCE | 0.00829063567830953 |
| GO:0051353 | BP | GO:0051353 | positive regulation of oxidoreductase activity | HTR2B,VDR | 0.00829063567830953 |
| GO:0007611 | BP | GO:0007611 | learning or memory | PSEN1,NCSTN,HTR2A,DRD1 | 0.00830283609520405 |
| GO:0003158 | BP | GO:0003158 | endothelium development | KDR,VEGFA,HPSE | 0.00838570532489888 |
| GO:0014074 | BP | GO:0014074 | response to purine-containing compound | TRPV1,P2RY2,ADORA2A | 0.00838570532489888 |
| GO:0050714 | BP | GO:0050714 | positive regulation of protein secretion | TLR4,PRKCE,ADORA2A | 0.00854667446553583 |
| GO:0021795 | BP | GO:0021795 | cerebral cortex cell migration | PSEN1,HTR6 | 0.00863504162432922 |
| GO:0042088 | BP | GO:0042088 | T-helper 1 type immune response | TLR4,HRAS | 0.00863504162432922 |
| GO:0045776 | BP | GO:0045776 | negative regulation of blood pressure | TRPV1,ADRA1A | 0.00863504162432922 |
| GO:1903587 | BP | GO:1903587 | regulation of blood vessel endothelial cell proliferation involved in sprouting angiogenesis | VEGFA,FGF2 | 0.00863504162432922 |
| GO:0030534 | BP | GO:0030534 | adult behavior | NCSTN,HTR2A,DRD1 | 0.00870945748825359 |
| GO:0046165 | BP | GO:0046165 | alcohol biosynthetic process | CES1,FGF2,FDFT1 | 0.00870945748825359 |
| GO:0050921 | BP | GO:0050921 | positive regulation of chemotaxis | KDR,VEGFA,FGF2 | 0.00870945748825359 |
| GO:0005782 | CC | GO:0005782 | peroxisomal matrix | DDO,DAO | 0.00878041226560224 |
| GO:0031907 | CC | GO:0031907 | microbody lumen | DDO,DAO | 0.00878041226560224 |
| GO:0001508 | BP | GO:0001508 | action potential | ADRA1A,KCNH2,DRD1 | 0.00887405881984359 |
| GO:0035987 | BP | GO:0035987 | endodermal cell differentiation | MMP8,MMP2 | 0.00898578492567248 |
| GO:0042220 | BP | GO:0042220 | response to cocaine | HTR2A,DRD1 | 0.00898578492567248 |
| GO:0061028 | BP | GO:0061028 | establishment of endothelial barrier | VEGFA,HPSE | 0.00898578492567248 |
| GO:1903170 | BP | GO:1903170 | negative regulation of calcium ion transmembrane transport | ADRA2A,TLR9 | 0.00898578492567248 |
| GO:0060078 | BP | GO:0060078 | regulation of postsynaptic membrane potential | TRPV1,ADORA2A,GLRA2 | 0.00920873370081874 |
| GO:0048732 | BP | GO:0048732 | gland development | PSEN1,VEGFA,FGF2,VDR,MMP2 | 0.00925919678941228 |
| GO:0007215 | BP | GO:0007215 | glutamate receptor signaling pathway | SSTR1,NCSTN | 0.00934282710783259 |
| GO:0043114 | BP | GO:0043114 | regulation of vascular permeability | VEGFA,ADORA2A | 0.00934282710783259 |
| GO:0060976 | BP | GO:0060976 | coronary vasculature development | VEGFA,FGF2 | 0.00934282710783259 |
| GO:0071385 | BP | GO:0071385 | cellular response to glucocorticoid stimulus | SSTR2,SSTR4 | 0.00934282710783259 |
| GO:0015276 | MF | GO:0015276 | ligand-gated monoatomic ion channel activity | TRPV1,KCNH2,GLRA2 | 0.00936790527813931 |
| GO:0022834 | MF | GO:0022834 | ligand-gated channel activity | TRPV1,KCNH2,GLRA2 | 0.00954320327306623 |
| GO:0006865 | BP | GO:0006865 | amino acid transport | PSEN1,TRPV1,ADORA2A | 0.00955073286640548 |
| GO:0038084 | BP | GO:0038084 | vascular endothelial growth factor signaling pathway | KDR,VEGFA | 0.00970612985960551 |
| GO:0007548 | BP | GO:0007548 | sex differentiation | KDR,VEGFA,TLR9,MMP2 | 0.00984682146856343 |
| GO:0050729 | BP | GO:0050729 | positive regulation of inflammatory response | TLR4,TLR9,MMP8 | 0.00990008876749998 |
| GO:0006110 | BP | GO:0006110 | regulation of glycolytic process | PSEN1,HTR2A | 0.0100756550324928 |
| GO:1904707 | BP | GO:1904707 | positive regulation of vascular associated smooth muscle cell proliferation | FGF2,MMP2 | 0.0100756550324928 |
| GO:0043535 | BP | GO:0043535 | regulation of blood vessel endothelial cell migration | KDR,VEGFA,FGF2 | 0.0100775352815675 |
| GO:0034765 | BP | GO:0034765 | regulation of monoatomic ion transmembrane transport | PRKCE,ADRA2A,TLR9,KCNH2,DRD1 | 0.0102243977718969 |
| GO:1902692 | BP | GO:1902692 | regulation of neuroblast proliferation | VEGFA,FGF2 | 0.0104513646401067 |
| GO:0004879 | MF | GO:0004879 | nuclear receptor activity | ESR2,VDR | 0.01046757564255 |
| GO:0098531 | MF | GO:0098531 | ligand-activated transcription factor activity | ESR2,VDR | 0.01046757564255 |
| GO:0005791 | CC | GO:0005791 | rough endoplasmic reticulum | PSEN1,CA4 | 0.0105123635570909 |
| GO:0010632 | BP | GO:0010632 | regulation of epithelial cell migration | KDR,VEGFA,PRKCE,FGF2 | 0.0106844674650954 |
| GO:0010761 | BP | GO:0010761 | fibroblast migration | PRKCE,FGF2 | 0.0108332208575769 |
| GO:0045744 | BP | GO:0045744 | negative regulation of G protein-coupled receptor signaling pathway | HTR2B,SSTR4 | 0.0108332208575769 |
| GO:0050805 | BP | GO:0050805 | negative regulation of synaptic transmission | HTR2A,DRD1 | 0.0108332208575769 |
| GO:0061178 | BP | GO:0061178 | regulation of insulin secretion involved in cellular response to glucose stimulus | PRKCE,ADRA2A | 0.0108332208575769 |
| GO:0001664 | MF | GO:0001664 | G protein-coupled receptor binding | P2RY2,ADORA2A,ADRA2A,ADRA2C | 0.0109148591979306 |
| GO:0001666 | BP | GO:0001666 | response to hypoxia | VEGFA,PRKCE,MMP2,CA9 | 0.0110571765559468 |
| GO:0006650 | BP | GO:0006650 | glycerophospholipid metabolic process | HTR2B,FGF2,HTR2A,HTR2C | 0.0110571765559468 |
| GO:0030667 | CC | GO:0030667 | secretory granule membrane | PSEN1,NCSTN,MGAM,CA4 | 0.0110587482092421 |
| GO:0043025 | CC | GO:0043025 | neuronal cell body | PSEN1,TRPV1,ADORA2A,HTR2A,ADRA2A | 0.0111684227674907 |
| GO:0002043 | BP | GO:0002043 | blood vessel endothelial cell proliferation involved in sprouting angiogenesis | VEGFA,FGF2 | 0.0112211860209598 |
| GO:0015872 | BP | GO:0015872 | dopamine transport | HTR2A,DRD1 | 0.0112211860209598 |
| GO:0034142 | BP | GO:0034142 | toll-like receptor 4 signaling pathway | TLR4,PRKCE | 0.0112211860209598 |
| GO:2000648 | BP | GO:2000648 | positive regulation of stem cell proliferation | KDR,FGF2 | 0.0112211860209598 |
| GO:0035577 | CC | GO:0035577 | azurophil granule membrane | PSEN1,NCSTN | 0.0112440691747022 |
| GO:0007249 | BP | GO:0007249 | canonical NF-kappaB signal transduction | TLR4,HTR2B,PRKCE,TLR9 | 0.0113102731020031 |
| GO:0051960 | BP | GO:0051960 | regulation of nervous system development | PSEN1,KDM4A,VEGFA,PPP1CC,FGF2 | 0.0113542126550101 |
| GO:0006935 | BP | GO:0006935 | chemotaxis | KDR,VEGFA,FGF2,HRAS,MMP2 | 0.0115505006519634 |
| GO:0001954 | BP | GO:0001954 | positive regulation of cell-matrix adhesion | KDR,VEGFA | 0.0116152226266491 |
| GO:0034205 | BP | GO:0034205 | amyloid-beta formation | PSEN1,NCSTN | 0.0116152226266491 |
| GO:0042330 | BP | GO:0042330 | taxis | KDR,VEGFA,FGF2,HRAS,MMP2 | 0.0117491038466456 |
| GO:0048592 | BP | GO:0048592 | eye morphogenesis | KDR,VEGFA,FGF2 | 0.0117582657263629 |
| GO:0007254 | BP | GO:0007254 | JNK cascade | TLR4,HRAS,TLR9 | 0.0119543769532113 |
| GO:0048608 | BP | GO:0048608 | reproductive structure development | KDR,VEGFA,TLR9,MMP2 | 0.011959343114532 |
| GO:0032589 | CC | GO:0032589 | neuron projection membrane | TRPV1,ADORA2A | 0.0119976314467022 |
| GO:0006584 | BP | GO:0006584 | catecholamine metabolic process | DAO,DRD1 | 0.0120152933307891 |
| GO:0009712 | BP | GO:0009712 | catechol-containing compound metabolic process | DAO,DRD1 | 0.0120152933307891 |
| GO:0002757 | BP | GO:0002757 | immune response-activating signaling pathway | TLR4,PSEN1,PRKCE,HRAS,TLR9 | 0.0120513768410364 |
| GO:1903829 | BP | GO:1903829 | positive regulation of protein localization | TLR4,PSEN1,PRKCE,ADORA2A,HRAS | 0.0123589287135301 |
| GO:0043197 | CC | GO:0043197 | dendritic spine | PPP1CC,TRPV1,DRD1 | 0.0123822830292048 |
| GO:0001706 | BP | GO:0001706 | endoderm formation | MMP8,MMP2 | 0.012421360948689 |
| GO:0031663 | BP | GO:0031663 | lipopolysaccharide-mediated signaling pathway | TLR4,PRKCE | 0.012421360948689 |
| GO:0045428 | BP | GO:0045428 | regulation of nitric oxide biosynthetic process | TLR4,TRPV1 | 0.012421360948689 |
| GO:0061458 | BP | GO:0061458 | reproductive system development | KDR,VEGFA,TLR9,MMP2 | 0.0124955549611205 |
| GO:0019932 | BP | GO:0019932 | second-messenger-mediated signaling | KDR,VEGFA,HTR2B,HTR2C | 0.0126319827804796 |
| GO:0044309 | CC | GO:0044309 | neuron spine | PPP1CC,TRPV1,DRD1 | 0.012767331216327 |
| GO:0035580 | CC | GO:0035580 | specific granule lumen | HPSE,MMP8 | 0.0127727957201071 |
| GO:0032608 | BP | GO:0032608 | interferon-beta production | TLR4,TLR9 | 0.0128333884542406 |
| GO:0032648 | BP | GO:0032648 | regulation of interferon-beta production | TLR4,TLR9 | 0.0128333884542406 |
| GO:0050731 | BP | GO:0050731 | positive regulation of peptidyl-tyrosine phosphorylation | VEGFA,HTR2A,ADRA2A | 0.0129632545779296 |
| GO:1990845 | BP | GO:1990845 | adaptive thermogenesis | TLR4,VEGFA,TRPV1 | 0.0129632545779296 |
| GO:0015698 | BP | GO:0015698 | inorganic anion transport | VDR,CA7,GLRA2 | 0.0131707139173989 |
| GO:0001658 | BP | GO:0001658 | branching involved in ureteric bud morphogenesis | VEGFA,FGF2 | 0.0132513389793359 |
| GO:0006695 | BP | GO:0006695 | cholesterol biosynthetic process | CES1,FDFT1 | 0.0132513389793359 |
| GO:0007566 | BP | GO:0007566 | embryo implantation | VEGFA,MMP2 | 0.0132513389793359 |
| GO:0045604 | BP | GO:0045604 | regulation of epidermal cell differentiation | FGF2,VDR | 0.0132513389793359 |
| GO:0071384 | BP | GO:0071384 | cellular response to corticosteroid stimulus | SSTR2,SSTR4 | 0.0132513389793359 |
| GO:0080164 | BP | GO:0080164 | regulation of nitric oxide metabolic process | TLR4,TRPV1 | 0.0132513389793359 |
| GO:1902653 | BP | GO:1902653 | secondary alcohol biosynthetic process | CES1,FDFT1 | 0.0132513389793359 |
| GO:0036293 | BP | GO:0036293 | response to decreased oxygen levels | VEGFA,PRKCE,MMP2,CA9 | 0.0133284872571732 |
| GO:0006937 | BP | GO:0006937 | regulation of muscle contraction | ADRA1A,ADRA2A,ADRA2C | 0.013380074029903 |
| GO:0009266 | BP | GO:0009266 | response to temperature stimulus | HTR2B,TRPV1,HTR2A | 0.0135913374161572 |
| GO:0048660 | BP | GO:0048660 | regulation of smooth muscle cell proliferation | TLR4,FGF2,MMP2 | 0.0135913374161572 |
| GO:0051897 | BP | GO:0051897 | positive regulation of phosphatidylinositol 3-kinase/protein kinase B signal transduction | KDR,FGF2,HPSE | 0.0135913374161572 |
| GO:0050890 | BP | GO:0050890 | cognition | PSEN1,NCSTN,HTR2A,DRD1 | 0.0136138353709987 |
| GO:0048010 | BP | GO:0048010 | vascular endothelial growth factor receptor signaling pathway | KDR,VEGFA | 0.013675175813289 |
| GO:0050994 | BP | GO:0050994 | regulation of lipid catabolic process | PRKCE,ADRA2A | 0.013675175813289 |
| GO:1903670 | BP | GO:1903670 | regulation of sprouting angiogenesis | VEGFA,FGF2 | 0.013675175813289 |
| GO:0002429 | BP | GO:0002429 | immune response-activating cell surface receptor signaling pathway | TLR4,PSEN1,PRKCE,HRAS | 0.0137579640238115 |
| GO:0002262 | BP | GO:0002262 | myeloid cell homeostasis | P4HTM,NCSTN,VEGFA | 0.0140195836606153 |
| GO:0022617 | BP | GO:0022617 | extracellular matrix disassembly | MMP8,MMP2 | 0.014104862402258 |
| GO:0043030 | BP | GO:0043030 | regulation of macrophage activation | TLR4,MMP8 | 0.014104862402258 |
| GO:0048659 | BP | GO:0048659 | smooth muscle cell proliferation | TLR4,FGF2,MMP2 | 0.0144554712545443 |
| GO:0032757 | BP | GO:0032757 | positive regulation of interleukin-8 production | TLR4,TLR9 | 0.0145403623486699 |
| GO:0043470 | BP | GO:0043470 | regulation of carbohydrate catabolic process | PSEN1,HTR2A | 0.0145403623486699 |
| GO:0051893 | BP | GO:0051893 | regulation of focal adhesion assembly | KDR,VEGFA | 0.0145403623486699 |
| GO:0070050 | BP | GO:0070050 | neuron cellular homeostasis | PSEN1,CA7 | 0.0145403623486699 |
| GO:0090109 | BP | GO:0090109 | regulation of cell-substrate junction assembly | KDR,VEGFA | 0.0145403623486699 |
| GO:0140895 | BP | GO:0140895 | cell surface toll-like receptor signaling pathway | TLR4,PRKCE | 0.0145403623486699 |
| GO:2000179 | BP | GO:2000179 | positive regulation of neural precursor cell proliferation | VEGFA,FGF2 | 0.0145403623486699 |
| GO:0001667 | BP | GO:0001667 | ameboidal-type cell migration | KDR,VEGFA,HTR2B,PRKCE,FGF2 | 0.0146630218327456 |
| GO:0060326 | BP | GO:0060326 | cell chemotaxis | KDR,VEGFA,FGF2,MMP2 | 0.0147942202517966 |
| GO:0001764 | BP | GO:0001764 | neuron migration | PSEN1,VEGFA,DRD1 | 0.0148990176961428 |
| GO:0001885 | BP | GO:0001885 | endothelial cell development | VEGFA,HPSE | 0.0149816394106472 |
| GO:0030225 | BP | GO:0030225 | macrophage differentiation | TLR4,VEGFA | 0.0149816394106472 |
| GO:0032615 | BP | GO:0032615 | interleukin-12 production | TLR4,TLR9 | 0.0149816394106472 |
| GO:0032655 | BP | GO:0032655 | regulation of interleukin-12 production | TLR4,TLR9 | 0.0149816394106472 |
| GO:0035773 | BP | GO:0035773 | insulin secretion involved in cellular response to glucose stimulus | PRKCE,ADRA2A | 0.0149816394106472 |
| GO:0062208 | BP | GO:0062208 | positive regulation of pattern recognition receptor signaling pathway | TLR4,TLR9 | 0.0149816394106472 |
| GO:2000630 | BP | GO:2000630 | positive regulation of miRNA metabolic process | FGF2,HRAS | 0.0149816394106472 |
| GO:0002764 | BP | GO:0002764 | immune response-regulating signaling pathway | TLR4,PSEN1,PRKCE,HRAS,TLR9 | 0.0150142590890691 |
| GO:0008202 | BP | GO:0008202 | steroid metabolic process | HSD11B1,GC,CES1,FDFT1 | 0.0150991501805368 |
| GO:0015718 | BP | GO:0015718 | monocarboxylic acid transport | CES1,RBP2,SSTR4 | 0.0153502393931134 |
| GO:0030888 | BP | GO:0030888 | regulation of B cell proliferation | TLR4,TLR9 | 0.015428657501436 |
| GO:0032613 | BP | GO:0032613 | interleukin-10 production | TLR4,TLR9 | 0.015428657501436 |
| GO:0032653 | BP | GO:0032653 | regulation of interleukin-10 production | TLR4,TLR9 | 0.015428657501436 |
| GO:0050435 | BP | GO:0050435 | amyloid-beta metabolic process | PSEN1,NCSTN | 0.015428657501436 |
| GO:1905330 | BP | GO:1905330 | regulation of morphogenesis of an epithelium | VEGFA,FGF2 | 0.015428657501436 |
| GO:0021700 | BP | GO:0021700 | developmental maturation | KDR,CDC25B,VEGFA,MMP2 | 0.0155639878931673 |
| GO:0042277 | MF | GO:0042277 | peptide binding | TLR4,SSTR1,SSTR2,SSTR4 | 0.0158078018157004 |
| GO:0043534 | BP | GO:0043534 | blood vessel endothelial cell migration | KDR,VEGFA,FGF2 | 0.0158091516775922 |
| GO:0045682 | BP | GO:0045682 | regulation of epidermis development | FGF2,VDR | 0.0158813806888369 |
| GO:0061180 | BP | GO:0061180 | mammary gland epithelium development | FGF2,VDR | 0.0158813806888369 |
| GO:0016042 | BP | GO:0016042 | lipid catabolic process | HSD11B1,CES1,PRKCE,ADRA2A | 0.016197749096233 |
| GO:0016126 | BP | GO:0016126 | sterol biosynthetic process | CES1,FDFT1 | 0.0163397731946367 |
| GO:0060675 | BP | GO:0060675 | ureteric bud morphogenesis | VEGFA,FGF2 | 0.0163397731946367 |
| GO:0060760 | BP | GO:0060760 | positive regulation of response to cytokine stimulus | TLR4,MMP8 | 0.0163397731946367 |
| GO:0062012 | BP | GO:0062012 | regulation of small molecule metabolic process | PSEN1,CES1,PRKCE,HTR2A | 0.0166836217143065 |
| GO:0045766 | BP | GO:0045766 | positive regulation of angiogenesis | KDR,VEGFA,FGF2 | 0.01675010404833 |
| GO:1904018 | BP | GO:1904018 | positive regulation of vasculature development | KDR,VEGFA,FGF2 | 0.01675010404833 |
| GO:0042987 | BP | GO:0042987 | amyloid precursor protein catabolic process | PSEN1,NCSTN | 0.0168037993940432 |
| GO:0051926 | BP | GO:0051926 | negative regulation of calcium ion transport | ADRA2A,TLR9 | 0.0168037993940432 |
| GO:0072171 | BP | GO:0072171 | mesonephric tubule morphogenesis | VEGFA,FGF2 | 0.0168037993940432 |
| GO:0150116 | BP | GO:0150116 | regulation of cell-substrate junction organization | KDR,VEGFA | 0.0168037993940432 |
| GO:0043627 | BP | GO:0043627 | response to estrogen | ESR2,MMP2 | 0.0172734238151208 |
| GO:1901224 | BP | GO:1901224 | positive regulation of non-canonical NF-kappaB signal transduction | TLR4,TLR9 | 0.0172734238151208 |
| GO:0007265 | BP | GO:0007265 | Ras protein signal transduction | LPAR2,FGF2,HRAS,ADRA2A | 0.0173456183444855 |
| GO:0001505 | BP | GO:0001505 | regulation of neurotransmitter levels | PSEN1,ADORA2A,DRD1 | 0.0174761046918684 |
| GO:0006109 | BP | GO:0006109 | regulation of carbohydrate metabolic process | PSEN1,PRKCE,HTR2A | 0.0174761046918684 |
| GO:0008237 | MF | GO:0008237 | metallopeptidase activity | MMP8,CPA1,MMP2 | 0.0176544027742612 |
| GO:0070482 | BP | GO:0070482 | response to oxygen levels | VEGFA,PRKCE,MMP2,CA9 | 0.0176827212264397 |
| GO:0002752 | BP | GO:0002752 | cell surface pattern recognition receptor signaling pathway | TLR4,PRKCE | 0.0177486111382286 |
| GO:0009311 | BP | GO:0009311 | oligosaccharide metabolic process | MGAM,SI | 0.0177486111382286 |
| GO:0043010 | BP | GO:0043010 | camera-type eye development | KDR,PSEN1,VEGFA,FGF2 | 0.0178528051231818 |
| GO:0002040 | BP | GO:0002040 | sprouting angiogenesis | KDR,VEGFA,FGF2 | 0.0179697862547146 |
| GO:0002768 | BP | GO:0002768 | immune response-regulating cell surface receptor signaling pathway | TLR4,PSEN1,PRKCE,HRAS | 0.0181960466609294 |
| GO:0021543 | BP | GO:0021543 | pallium development | PSEN1,DRD1,HTR6 | 0.0182195350980291 |
| GO:0045600 | BP | GO:0045600 | positive regulation of fat cell differentiation | HTR2A,HTR2C | 0.0182293261954605 |
| GO:0032496 | BP | GO:0032496 | response to lipopolysaccharide | TLR4,PRKCE,TLR9,MMP8 | 0.0185433981070511 |
| GO:0030858 | BP | GO:0030858 | positive regulation of epithelial cell differentiation | FGF2,VDR | 0.0187155339700865 |
| GO:0032481 | BP | GO:0032481 | positive regulation of type I interferon production | TLR4,TLR9 | 0.0187155339700865 |
| GO:0032722 | BP | GO:0032722 | positive regulation of chemokine production | TLR4,TLR9 | 0.0187155339700865 |
| GO:0071260 | BP | GO:0071260 | cellular response to mechanical stimulus | TLR4,FGF2 | 0.0187155339700865 |
| GO:0009895 | BP | GO:0009895 | negative regulation of catabolic process | PSEN1,KDM4A,ADRA1A,ADRA2A | 0.0187186193268144 |
| GO:0046982 | MF | GO:0046982 | protein heterodimerization activity | TLR4,ADRA1A,ADRA2A,ADRA2C | 0.0190607124005259 |
| GO:0006809 | BP | GO:0006809 | nitric oxide biosynthetic process | TLR4,TRPV1 | 0.0192071995959969 |
| GO:0050818 | BP | GO:0050818 | regulation of coagulation | PSEN1,HPSE | 0.0192071995959969 |
| GO:0140962 | BP | GO:0140962 | multicellular organismal-level chemical homeostasis | KDR,VEGFA | 0.0192071995959969 |
| GO:0048469 | BP | GO:0048469 | cell maturation | KDR,CDC25B,VEGFA | 0.0192379429119492 |
| GO:0090276 | BP | GO:0090276 | regulation of peptide hormone secretion | PRKCE,ADRA2A,HTR2C | 0.0192379429119492 |
| GO:0098960 | MF | GO:0098960 | postsynaptic neurotransmitter receptor activity | DRD1,GLRA2 | 0.0194291338817233 |
| GO:0030522 | BP | GO:0030522 | intracellular receptor signaling pathway | TLR4,ESR2,TLR9,VDR | 0.0194298465997107 |
| GO:0050795 | BP | GO:0050795 | regulation of behavior | HTR2B,ADORA2A | 0.0197042883571472 |
| GO:0010506 | BP | GO:0010506 | regulation of autophagy | KDR,KDM4A,ADRA1A,TLR9 | 0.0197916885976935 |
| GO:0031589 | BP | GO:0031589 | cell-substrate adhesion | KDR,VEGFA,PRKCE,HPSE | 0.0199741723019227 |
| GO:0002791 | BP | GO:0002791 | regulation of peptide secretion | PRKCE,ADRA2A,HTR2C | 0.0200221580448693 |
| GO:0031334 | BP | GO:0031334 | positive regulation of protein-containing complex assembly | TLR4,VEGFA,PRKCE | 0.0200221580448693 |
| GO:0045664 | BP | GO:0045664 | regulation of neuron differentiation | KDM4A,FGF2,ADRA2C | 0.0200221580448693 |
| GO:0098982 | CC | GO:0098982 | GABA-ergic synapse | ADRA2A,DRD1 | 0.0201987142270908 |
| GO:0035924 | BP | GO:0035924 | cellular response to vascular endothelial growth factor stimulus | KDR,VEGFA | 0.0202067656870059 |
| GO:0005230 | MF | GO:0005230 | extracellular ligand-gated monoatomic ion channel activity | TRPV1,GLRA2 | 0.0204540806901639 |
| GO:0010038 | BP | GO:0010038 | response to metal ion | NCSTN,TLR9,CPA1,GLRA2 | 0.0205278929877182 |
| GO:0071248 | BP | GO:0071248 | cellular response to metal ion | NCSTN,TLR9,GLRA2 | 0.0205546986512829 |
| GO:0090087 | BP | GO:0090087 | regulation of peptide transport | PRKCE,ADRA2A,HTR2C | 0.0205546986512829 |
| GO:0005977 | BP | GO:0005977 | glycogen metabolic process | PPP1CC,PYGM | 0.0207145971680035 |
| GO:0005901 | CC | GO:0005901 | caveola | ADRA1A,HTR2A | 0.0211667842050003 |
| GO:0070373 | BP | GO:0070373 | negative regulation of ERK1 and ERK2 cascade | TLR4,TLR9 | 0.0212277485309836 |
| GO:0072078 | BP | GO:0072078 | nephron tubule morphogenesis | VEGFA,FGF2 | 0.0212277485309836 |
| GO:0019233 | BP | GO:0019233 | sensory perception of pain | TRPV1,HTR2A | 0.0217461856546558 |
| GO:0046209 | BP | GO:0046209 | nitric oxide metabolic process | TLR4,TRPV1 | 0.0217461856546558 |
| GO:0009897 | CC | GO:0009897 | external side of plasma membrane | TLR4,KDR,TRPV1,CA4 | 0.0221048056362637 |
| GO:0140993 | MF | GO:0140993 | histone modifying activity | KDM4A,PHF8,KDM4E | 0.0222187344488405 |
| GO:0009306 | BP | GO:0009306 | protein secretion | TLR4,PRKCE,ADORA2A,ADRA2A | 0.0222458323022671 |
| GO:0072088 | BP | GO:0072088 | nephron epithelium morphogenesis | VEGFA,FGF2 | 0.0222698745650505 |
| GO:2001057 | BP | GO:2001057 | reactive nitrogen species metabolic process | TLR4,TRPV1 | 0.0222698745650505 |
| GO:0002237 | BP | GO:0002237 | response to molecule of bacterial origin | TLR4,PRKCE,TLR9,MMP8 | 0.0224420028539287 |
| GO:0035592 | BP | GO:0035592 | establishment of protein localization to extracellular region | TLR4,PRKCE,ADORA2A,ADRA2A | 0.0224420028539287 |
| GO:0006836 | BP | GO:0006836 | neurotransmitter transport | PSEN1,ADORA2A,DRD1 | 0.022479963121062 |
| GO:0008016 | BP | GO:0008016 | regulation of heart contraction | TRPV1,ADRA1A,KCNH2 | 0.0227627991854817 |
| GO:0071383 | BP | GO:0071383 | cellular response to steroid hormone stimulus | ESR2,SSTR2,SSTR4 | 0.0227627991854817 |
| GO:0007193 | BP | GO:0007193 | adenylate cyclase-inhibiting G protein-coupled receptor signaling pathway | ADRA2A,SSTR2 | 0.0227987814349752 |
| GO:0010631 | BP | GO:0010631 | epithelial cell migration | KDR,VEGFA,PRKCE,FGF2 | 0.0230368963776313 |
| GO:0033293 | MF | GO:0033293 | monocarboxylic acid binding | VDR,RBP2 | 0.0231130406450583 |
| GO:0007405 | BP | GO:0007405 | neuroblast proliferation | VEGFA,FGF2 | 0.0233328725834736 |
| GO:0061333 | BP | GO:0061333 | renal tubule morphogenesis | VEGFA,FGF2 | 0.0233328725834736 |
| GO:0072028 | BP | GO:0072028 | nephron morphogenesis | VEGFA,FGF2 | 0.0233328725834736 |
| GO:1901019 | BP | GO:1901019 | regulation of calcium ion transmembrane transporter activity | ADRA2A,TLR9 | 0.0233328725834736 |
| GO:0090132 | BP | GO:0090132 | epithelium migration | KDR,VEGFA,PRKCE,FGF2 | 0.0236413902190216 |
| GO:0035064 | MF | GO:0035064 | methylated histone binding | KDM4A,PHF8 | 0.0236611031345808 |
| GO:0051341 | BP | GO:0051341 | regulation of oxidoreductase activity | HTR2B,VDR | 0.0238721144752849 |
| GO:0071692 | BP | GO:0071692 | protein localization to extracellular region | TLR4,PRKCE,ADORA2A,ADRA2A | 0.024049736598962 |
| GO:0001570 | BP | GO:0001570 | vasculogenesis | KDR,VEGFA | 0.0244164737203067 |
| GO:0007492 | BP | GO:0007492 | endoderm development | MMP8,MMP2 | 0.0244164737203067 |
| GO:0019935 | BP | GO:0019935 | cyclic-nucleotide-mediated signaling | HTR2B,HTR2C | 0.0244164737203067 |
| GO:0051279 | BP | GO:0051279 | regulation of release of sequestered calcium ion into cytosol | PRKCE,DRD1 | 0.0244164737203067 |
| GO:0043270 | BP | GO:0043270 | positive regulation of monoatomic ion transport | ADRA2A,KCNH2,DRD1 | 0.0245007715467899 |
| GO:0090130 | BP | GO:0090130 | tissue migration | KDR,VEGFA,PRKCE,FGF2 | 0.0246703064578168 |
| GO:0140034 | MF | GO:0140034 | methylation-dependent protein binding | KDM4A,PHF8 | 0.024773213491519 |
| GO:0048678 | BP | GO:0048678 | response to axon injury | FGF2,MMP2 | 0.0249659170730583 |
| GO:0050871 | BP | GO:0050871 | positive regulation of B cell activation | TLR4,TLR9 | 0.0249659170730583 |
| GO:0034764 | BP | GO:0034764 | positive regulation of transmembrane transport | PSEN1,KCNH2,DRD1 | 0.0253960832349713 |
| GO:0048041 | BP | GO:0048041 | focal adhesion assembly | KDR,VEGFA | 0.0255204114321465 |
| GO:0071230 | BP | GO:0071230 | cellular response to amino acid stimulus | MMP2,GLRA2 | 0.0255204114321465 |
| GO:0008544 | BP | GO:0008544 | epidermis development | FGF2,HPSE,VDR,RBP2 | 0.025726135312945 |
| GO:0051117 | MF | GO:0051117 | ATPase binding | PSEN1,NCSTN | 0.0259064027024978 |
| GO:0032370 | BP | GO:0032370 | positive regulation of lipid transport | CES1,SSTR4 | 0.0260799238397332 |
| GO:0055013 | BP | GO:0055013 | cardiac muscle cell development | VEGFA,ADRA1A | 0.0260799238397332 |
| GO:2000243 | BP | GO:2000243 | positive regulation of reproductive process | CDC25B,VEGFA | 0.0260799238397332 |
| GO:2000628 | BP | GO:2000628 | regulation of miRNA metabolic process | FGF2,HRAS | 0.0260799238397332 |
| GO:0010810 | BP | GO:0010810 | regulation of cell-substrate adhesion | KDR,VEGFA,PRKCE | 0.0263089365281754 |
| GO:0046486 | BP | GO:0046486 | glycerolipid metabolic process | HTR2B,FGF2,HTR2A,HTR2C | 0.0268090170052688 |
| GO:0001654 | BP | GO:0001654 | eye development | KDR,PSEN1,VEGFA,FGF2 | 0.0270288513078548 |
| GO:0048864 | BP | GO:0048864 | stem cell development | HTR2B,FGF2 | 0.0272138716836422 |
| GO:0006096 | BP | GO:0006096 | glycolytic process | PSEN1,HTR2A | 0.0277882419172956 |
| GO:0006112 | BP | GO:0006112 | energy reserve metabolic process | PPP1CC,PYGM | 0.0277882419172956 |
| GO:0050829 | BP | GO:0050829 | defense response to Gram-negative bacterium | TLR4,TLR9 | 0.0277882419172956 |
| GO:0055017 | BP | GO:0055017 | cardiac muscle tissue growth | FGF2,ADRA1A | 0.0277882419172956 |
| GO:0150063 | BP | GO:0150063 | visual system development | KDR,PSEN1,VEGFA,FGF2 | 0.0279190815977498 |
| GO:0050660 | MF | GO:0050660 | flavin adenine dinucleotide binding | DDO,DAO | 0.0282349009556319 |
| GO:0004175 | MF | GO:0004175 | endopeptidase activity | PSEN1,NCSTN,MMP8,MMP2 | 0.0283360084853059 |
| GO:0010507 | BP | GO:0010507 | negative regulation of autophagy | KDM4A,ADRA1A | 0.0283674997930571 |
| GO:0006560 | BP | GO:0006560 | proline metabolic process | DAO | 0.0287742318592538 |
| GO:0010572 | BP | GO:0010572 | positive regulation of platelet activation | TLR4 | 0.0287742318592538 |
| GO:0014012 | BP | GO:0014012 | peripheral nervous system axon regeneration | MMP2 | 0.0287742318592538 |
| GO:0014820 | BP | GO:0014820 | tonic smooth muscle contraction | HTR2A | 0.0287742318592538 |
| GO:0035768 | BP | GO:0035768 | endothelial cell chemotaxis to fibroblast growth factor | FGF2 | 0.0287742318592538 |
| GO:0042711 | BP | GO:0042711 | maternal behavior | DRD1 | 0.0287742318592538 |
| GO:0060075 | BP | GO:0060075 | regulation of resting membrane potential | PSEN1 | 0.0287742318592538 |
| GO:0060346 | BP | GO:0060346 | bone trabecula formation | MMP2 | 0.0287742318592538 |
| GO:0060947 | BP | GO:0060947 | cardiac vascular smooth muscle cell differentiation | VEGFA | 0.0287742318592538 |
| GO:0061418 | BP | GO:0061418 | regulation of transcription from RNA polymerase II promoter in response to hypoxia | VEGFA | 0.0287742318592538 |
| GO:0070391 | BP | GO:0070391 | response to lipoteichoic acid | TLR4 | 0.0287742318592538 |
| GO:0070432 | BP | GO:0070432 | regulation of nucleotide-binding oligomerization domain containing 2 signaling pathway | TLR4 | 0.0287742318592538 |
| GO:0070562 | BP | GO:0070562 | regulation of vitamin D receptor signaling pathway | VDR | 0.0287742318592538 |
| GO:0071223 | BP | GO:0071223 | cellular response to lipoteichoic acid | TLR4 | 0.0287742318592538 |
| GO:1901993 | BP | GO:1901993 | regulation of meiotic cell cycle phase transition | CDC25B | 0.0287742318592538 |
| GO:1903010 | BP | GO:1903010 | regulation of bone development | KDR | 0.0287742318592538 |
| GO:1903980 | BP | GO:1903980 | positive regulation of microglial cell activation | MMP8 | 0.0287742318592538 |
| GO:1990700 | BP | GO:1990700 | nucleolar chromatin organization | PHF8 | 0.0287742318592538 |
| GO:2000048 | BP | GO:2000048 | negative regulation of cell-cell adhesion mediated by cadherin | VEGFA | 0.0287742318592538 |
| GO:2000544 | BP | GO:2000544 | regulation of endothelial cell chemotaxis to fibroblast growth factor | FGF2 | 0.0287742318592538 |
| GO:0043178 | MF | GO:0043178 | alcohol binding | PRKCE,RBP2 | 0.0288297656038193 |
| GO:0002220 | BP | GO:0002220 | innate immune response activating cell surface receptor signaling pathway | TLR4,PRKCE | 0.0289516130629383 |
| GO:0071241 | BP | GO:0071241 | cellular response to inorganic substance | NCSTN,TLR9,GLRA2 | 0.0291526094213583 |
| GO:0048880 | BP | GO:0048880 | sensory system development | KDR,PSEN1,VEGFA,FGF2 | 0.0292872087413949 |
| GO:0031996 | MF | GO:0031996 | thioesterase binding | ADRA2A | 0.0293484361940483 |
| GO:0032052 | MF | GO:0032052 | bile acid binding | VDR | 0.0293484361940483 |
| GO:0035256 | MF | GO:0035256 | G protein-coupled glutamate receptor binding | ADORA2A | 0.0293484361940483 |
| GO:0045322 | MF | GO:0045322 | unmethylated CpG binding | TLR9 | 0.0293484361940483 |
| GO:1903510 | BP | GO:1903510 | mucopolysaccharide metabolic process | FGF2,HPSE | 0.0295405496193478 |
| GO:0010594 | BP | GO:0010594 | regulation of endothelial cell migration | KDR,VEGFA,FGF2 | 0.0298059120972176 |
| GO:0032412 | BP | GO:0032412 | regulation of monoatomic ion transmembrane transporter activity | PRKCE,ADRA2A,TLR9 | 0.0298059120972176 |
| GO:0097648 | CC | GO:0097648 | G protein-coupled receptor complex | DRD1 | 0.0300136081187808 |
| GO:0032465 | BP | GO:0032465 | regulation of cytokinesis | CDC25B,PRKCE | 0.0301342774945715 |
| GO:0039531 | BP | GO:0039531 | regulation of viral-induced cytoplasmic pattern recognition receptor signaling pathway | TLR4,TLR9 | 0.0301342774945715 |
| GO:0055006 | BP | GO:0055006 | cardiac cell development | VEGFA,ADRA1A | 0.0301342774945715 |
| GO:1901606 | BP | GO:1901606 | alpha-amino acid catabolic process | DDO,DAO | 0.0301342774945715 |
| GO:1904705 | BP | GO:1904705 | regulation of vascular associated smooth muscle cell proliferation | FGF2,MMP2 | 0.0301342774945715 |
| GO:0050920 | BP | GO:0050920 | regulation of chemotaxis | KDR,VEGFA,FGF2 | 0.0301354729260584 |
| GO:0043202 | CC | GO:0043202 | lysosomal lumen | GC,HPSE | 0.0301414153245897 |
| GO:0005769 | CC | GO:0005769 | early endosome | TLR4,KDR,PSEN1,NCSTN | 0.0302757748174746 |
| GO:0031968 | CC | GO:0031968 | organelle outer membrane | PSEN1,DAO,PPP1CC | 0.0306220399229728 |
| GO:0002573 | BP | GO:0002573 | myeloid leukocyte differentiation | TLR4,PSEN1,VEGFA | 0.0311357806502538 |
| GO:0019867 | CC | GO:0019867 | outer membrane | PSEN1,DAO,PPP1CC | 0.0312581545619939 |
| GO:0003073 | BP | GO:0003073 | regulation of systemic arterial blood pressure | TRPV1,ADRA1A | 0.0313359800268831 |
| GO:0007044 | BP | GO:0007044 | cell-substrate junction assembly | KDR,VEGFA | 0.0313359800268831 |
| GO:0072091 | BP | GO:0072091 | regulation of stem cell proliferation | KDR,FGF2 | 0.0313359800268831 |
| GO:1990874 | BP | GO:1990874 | vascular associated smooth muscle cell proliferation | FGF2,MMP2 | 0.0313359800268831 |
| GO:0002221 | BP | GO:0002221 | pattern recognition receptor signaling pathway | TLR4,PRKCE,TLR9 | 0.0314730878418099 |
| GO:0016323 | CC | GO:0016323 | basolateral plasma membrane | ADRA2A,TLR9,CA9 | 0.0315788247188435 |
| GO:0001660 | BP | GO:0001660 | fever generation | TRPV1 | 0.0316065445447121 |
| GO:0002551 | BP | GO:0002551 | mast cell chemotaxis | VEGFA | 0.0316065445447121 |
| GO:0010764 | BP | GO:0010764 | negative regulation of fibroblast migration | FGF2 | 0.0316065445447121 |
| GO:0010887 | BP | GO:0010887 | negative regulation of cholesterol storage | CES1 | 0.0316065445447121 |
| GO:0014049 | BP | GO:0014049 | positive regulation of glutamate secretion | ADORA2A | 0.0316065445447121 |
| GO:0019511 | BP | GO:0019511 | peptidyl-proline hydroxylation | P4HTM | 0.0316065445447121 |
| GO:0021892 | BP | GO:0021892 | cerebral cortex GABAergic interneuron differentiation | DRD1 | 0.0316065445447121 |
| GO:0021936 | BP | GO:0021936 | regulation of cerebellar granule cell precursor proliferation | FGF2 | 0.0316065445447121 |
| GO:0030167 | BP | GO:0030167 | proteoglycan catabolic process | HPSE | 0.0316065445447121 |
| GO:0034163 | BP | GO:0034163 | regulation of toll-like receptor 9 signaling pathway | TLR9 | 0.0316065445447121 |
| GO:0035666 | BP | GO:0035666 | TRIF-dependent toll-like receptor signaling pathway | TLR4 | 0.0316065445447121 |
| GO:0035766 | BP | GO:0035766 | cell chemotaxis to fibroblast growth factor | FGF2 | 0.0316065445447121 |
| GO:0038183 | BP | GO:0038183 | bile acid signaling pathway | VDR | 0.0316065445447121 |
| GO:0043278 | BP | GO:0043278 | response to morphine | PRKCE | 0.0316065445447121 |
| GO:0048563 | BP | GO:0048563 | post-embryonic animal organ morphogenesis | KDR | 0.0316065445447121 |
| GO:0060746 | BP | GO:0060746 | parental behavior | DRD1 | 0.0316065445447121 |
| GO:0071492 | BP | GO:0071492 | cellular response to UV-A | MMP2 | 0.0316065445447121 |
| GO:0098696 | BP | GO:0098696 | regulation of neurotransmitter receptor localization to postsynaptic specialization membrane | HRAS | 0.0316065445447121 |
| GO:0106072 | BP | GO:0106072 | negative regulation of adenylate cyclase-activating G protein-coupled receptor signaling pathway | SSTR4 | 0.0316065445447121 |
| GO:1904181 | BP | GO:1904181 | positive regulation of membrane depolarization | KDR | 0.0316065445447121 |
| GO:1904464 | BP | GO:1904464 | regulation of matrix metallopeptidase secretion | TLR4 | 0.0316065445447121 |
| GO:1904847 | BP | GO:1904847 | regulation of cell chemotaxis to fibroblast growth factor | FGF2 | 0.0316065445447121 |
| GO:1990773 | BP | GO:1990773 | matrix metallopeptidase secretion | TLR4 | 0.0316065445447121 |
| GO:2000343 | BP | GO:2000343 | positive regulation of chemokine (C-X-C motif) ligand 2 production | TLR4 | 0.0316065445447121 |
| GO:0006909 | BP | GO:0006909 | phagocytosis | TLR4,PRKCE,ADORA2A | 0.031812328666895 |
| GO:0042982 | BP | GO:0042982 | amyloid precursor protein metabolic process | PSEN1,NCSTN | 0.0319438914432722 |
| GO:0033218 | MF | GO:0033218 | amide binding | TLR4,SSTR1,SSTR2,SSTR4 | 0.0321839415651206 |
| GO:0016594 | MF | GO:0016594 | glycine binding | GLRA2 | 0.0322363425020282 |
| GO:0034056 | MF | GO:0034056 | estrogen response element binding | ESR2 | 0.0322363425020282 |
| GO:0007160 | BP | GO:0007160 | cell-matrix adhesion | KDR,VEGFA,HPSE | 0.03249660609283 |
| GO:0022898 | BP | GO:0022898 | regulation of transmembrane transporter activity | PRKCE,ADRA2A,TLR9 | 0.03249660609283 |
| GO:0060419 | BP | GO:0060419 | heart growth | FGF2,ADRA1A | 0.0325564676960502 |
| GO:0001657 | BP | GO:0001657 | ureteric bud development | VEGFA,FGF2 | 0.0331736775091486 |
| GO:0006721 | BP | GO:0006721 | terpenoid metabolic process | FDFT1,RBP2 | 0.0331736775091486 |
| GO:0060993 | BP | GO:0060993 | kidney morphogenesis | VEGFA,FGF2 | 0.0331736775091486 |
| GO:0030072 | BP | GO:0030072 | peptide hormone secretion | PRKCE,ADRA2A,HTR2C | 0.0331886022487286 |
| GO:0005765 | CC | GO:0005765 | lysosomal membrane | PSEN1,NCSTN,TLR9,HPSE | 0.0335075806764161 |
| GO:0098852 | CC | GO:0098852 | lytic vacuole membrane | PSEN1,NCSTN,TLR9,HPSE | 0.0335075806764161 |
| GO:0050769 | BP | GO:0050769 | positive regulation of neurogenesis | VEGFA,PPP1CC,FGF2 | 0.0335374913269223 |
| GO:0006576 | BP | GO:0006576 | biogenic amine metabolic process | DAO,DRD1 | 0.033795489743292 |
| GO:0051588 | BP | GO:0051588 | regulation of neurotransmitter transport | ADORA2A,DRD1 | 0.033795489743292 |
| GO:0072163 | BP | GO:0072163 | mesonephric epithelium development | VEGFA,FGF2 | 0.033795489743292 |
| GO:0072164 | BP | GO:0072164 | mesonephric tubule development | VEGFA,FGF2 | 0.033795489743292 |
| GO:0060047 | BP | GO:0060047 | heart contraction | TRPV1,ADRA1A,KCNH2 | 0.033888305775378 |
| GO:0051091 | BP | GO:0051091 | positive regulation of DNA-binding transcription factor activity | TLR4,ESR2,TLR9 | 0.0342410440697326 |
| GO:0072080 | BP | GO:0072080 | nephron tubule development | VEGFA,FGF2 | 0.0344218733954906 |
| GO:2000177 | BP | GO:2000177 | regulation of neural precursor cell proliferation | VEGFA,FGF2 | 0.0344218733954906 |
| GO:0001553 | BP | GO:0001553 | luteinization | MMP2 | 0.0344307473152746 |
| GO:0001973 | BP | GO:0001973 | G protein-coupled adenosine receptor signaling pathway | ADORA2A | 0.0344307473152746 |
| GO:0003157 | BP | GO:0003157 | endocardium development | KDR | 0.0344307473152746 |
| GO:0006482 | BP | GO:0006482 | protein demethylation | PHF8 | 0.0344307473152746 |
| GO:0007320 | BP | GO:0007320 | insemination | DDO | 0.0344307473152746 |
| GO:0008214 | BP | GO:0008214 | protein dealkylation | PHF8 | 0.0344307473152746 |
| GO:0010749 | BP | GO:0010749 | regulation of nitric oxide mediated signal transduction | VEGFA | 0.0344307473152746 |
| GO:0010917 | BP | GO:0010917 | negative regulation of mitochondrial membrane potential | TRPV1 | 0.0344307473152746 |
| GO:0014004 | BP | GO:0014004 | microglia differentiation | TLR4 | 0.0344307473152746 |
| GO:0014072 | BP | GO:0014072 | response to isoquinoline alkaloid | PRKCE | 0.0344307473152746 |
| GO:0014831 | BP | GO:0014831 | gastro-intestinal system smooth muscle contraction | HTR2B | 0.0344307473152746 |
| GO:0014842 | BP | GO:0014842 | regulation of skeletal muscle satellite cell proliferation | FGF2 | 0.0344307473152746 |
| GO:0031293 | BP | GO:0031293 | membrane protein intracellular domain proteolysis | NCSTN | 0.0344307473152746 |
| GO:0032782 | BP | GO:0032782 | bile acid secretion | CES1 | 0.0344307473152746 |
| GO:0035588 | BP | GO:0035588 | G protein-coupled purinergic receptor signaling pathway | ADORA2A | 0.0344307473152746 |
| GO:0042416 | BP | GO:0042416 | dopamine biosynthetic process | DAO | 0.0344307473152746 |
| GO:0043589 | BP | GO:0043589 | skin morphogenesis | PSEN1 | 0.0344307473152746 |
| GO:0045602 | BP | GO:0045602 | negative regulation of endothelial cell differentiation | VEGFA | 0.0344307473152746 |
| GO:0045837 | BP | GO:0045837 | negative regulation of membrane potential | TRPV1 | 0.0344307473152746 |
| GO:0051583 | BP | GO:0051583 | dopamine uptake involved in synaptic transmission | DRD1 | 0.0344307473152746 |
| GO:0051798 | BP | GO:0051798 | positive regulation of hair follicle development | HPSE | 0.0344307473152746 |
| GO:0051934 | BP | GO:0051934 | catecholamine uptake involved in synaptic transmission | DRD1 | 0.0344307473152746 |
| GO:0070561 | BP | GO:0070561 | vitamin D receptor signaling pathway | VDR | 0.0344307473152746 |
| GO:0070857 | BP | GO:0070857 | regulation of bile acid biosynthetic process | CES1 | 0.0344307473152746 |
| GO:0071679 | BP | GO:0071679 | commissural neuron axon guidance | VEGFA | 0.0344307473152746 |
| GO:0097084 | BP | GO:0097084 | vascular associated smooth muscle cell development | VEGFA | 0.0344307473152746 |
| GO:1902337 | BP | GO:1902337 | regulation of apoptotic process involved in morphogenesis | VDR | 0.0344307473152746 |
| GO:1990535 | BP | GO:1990535 | neuron projection maintenance | PSEN1 | 0.0344307473152746 |
| GO:2001214 | BP | GO:2001214 | positive regulation of vasculogenesis | KDR | 0.0344307473152746 |
| GO:0000775 | CC | GO:0000775 | chromosome, centromeric region | PSEN1,KDM4A,PPP1CC | 0.0345430393762681 |
| GO:0032755 | BP | GO:0032755 | positive regulation of interleukin-6 production | TLR4,TLR9 | 0.0350527975985332 |
| GO:0031543 | MF | GO:0031543 | peptidyl-proline dioxygenase activity | P4HTM | 0.0351158124053224 |
| GO:0035197 | MF | GO:0035197 | siRNA binding | TLR9 | 0.0351158124053224 |
| GO:0055056 | MF | GO:0055056 | D-glucose transmembrane transporter activity | SLC5A2 | 0.0351158124053224 |
| GO:1902282 | MF | GO:1902282 | voltage-gated potassium channel activity involved in ventricular cardiac muscle cell action potential repolarization | KCNH2 | 0.0351158124053224 |
| GO:0050727 | BP | GO:0050727 | regulation of inflammatory response | TLR4,ADORA2A,TLR9,MMP8 | 0.0351563300602098 |
| GO:0033002 | BP | GO:0033002 | muscle cell proliferation | TLR4,FGF2,MMP2 | 0.0353107861692977 |
| GO:0048738 | BP | GO:0048738 | cardiac muscle tissue development | VEGFA,FGF2,ADRA1A | 0.0353107861692977 |
| GO:0090257 | BP | GO:0090257 | regulation of muscle system process | ADRA1A,ADRA2A,ADRA2C | 0.0353107861692977 |
| GO:0032009 | CC | GO:0032009 | early phagosome | TLR9 | 0.0353747928686503 |
| GO:0051896 | BP | GO:0051896 | regulation of phosphatidylinositol 3-kinase/protein kinase B signal transduction | KDR,FGF2,HPSE | 0.0356712037855776 |
| GO:0150115 | BP | GO:0150115 | cell-substrate junction organization | KDR,VEGFA | 0.0356882316204837 |
| GO:0009314 | BP | GO:0009314 | response to radiation | PPP1CC,HRAS,DRD1,MMP2 | 0.0359348772601029 |
| GO:0005903 | CC | GO:0005903 | brush border | CA4,SI | 0.0360078563680549 |
| GO:0001823 | BP | GO:0001823 | mesonephros development | VEGFA,FGF2 | 0.0363281448641773 |
| GO:0032677 | BP | GO:0032677 | regulation of interleukin-8 production | TLR4,TLR9 | 0.0363281448641773 |
| GO:0030099 | BP | GO:0030099 | myeloid cell differentiation | TLR4,PSEN1,P4HTM,VEGFA | 0.0364594774980179 |
| GO:0046883 | BP | GO:0046883 | regulation of hormone secretion | PRKCE,ADRA2A,HTR2C | 0.0367639432105026 |
| GO:0032637 | BP | GO:0032637 | interleukin-8 production | TLR4,TLR9 | 0.0369725068667202 |
| GO:0032642 | BP | GO:0032642 | regulation of chemokine production | TLR4,TLR9 | 0.0369725068667202 |
| GO:0042100 | BP | GO:0042100 | B cell proliferation | TLR4,TLR9 | 0.0369725068667202 |
| GO:0061326 | BP | GO:0061326 | renal tubule development | VEGFA,FGF2 | 0.0369725068667202 |
| GO:1905477 | BP | GO:1905477 | positive regulation of protein localization to membrane | PRKCE,HRAS | 0.0369725068667202 |
| GO:0002024 | BP | GO:0002024 | diet induced thermogenesis | TRPV1 | 0.0372468629636818 |
| GO:0007144 | BP | GO:0007144 | female meiosis I | CDC25B | 0.0372468629636818 |
| GO:0007512 | BP | GO:0007512 | adult heart development | ADRA1A | 0.0372468629636818 |
| GO:0010455 | BP | GO:0010455 | positive regulation of cell fate commitment | FGF2 | 0.0372468629636818 |
| GO:0033690 | BP | GO:0033690 | positive regulation of osteoblast proliferation | HPSE | 0.0372468629636818 |
| GO:0035589 | BP | GO:0035589 | G protein-coupled purinergic nucleotide receptor signaling pathway | P2RY2 | 0.0372468629636818 |
| GO:0035810 | BP | GO:0035810 | positive regulation of urine volume | ADORA2A | 0.0372468629636818 |
| GO:0036006 | BP | GO:0036006 | cellular response to macrophage colony-stimulating factor stimulus | TLR4 | 0.0372468629636818 |
| GO:0044771 | BP | GO:0044771 | meiotic cell cycle phase transition | CDC25B | 0.0372468629636818 |
| GO:0045986 | BP | GO:0045986 | negative regulation of smooth muscle contraction | ADRA2A | 0.0372468629636818 |
| GO:0061430 | BP | GO:0061430 | bone trabecula morphogenesis | MMP2 | 0.0372468629636818 |
| GO:0097475 | BP | GO:0097475 | motor neuron migration | VEGFA | 0.0372468629636818 |
| GO:0098693 | BP | GO:0098693 | regulation of synaptic vesicle cycle | PSEN1 | 0.0372468629636818 |
| GO:1902667 | BP | GO:1902667 | regulation of axon guidance | VEGFA | 0.0372468629636818 |
| GO:1904748 | BP | GO:1904748 | regulation of apoptotic process involved in development | VDR | 0.0372468629636818 |
| GO:2000678 | BP | GO:2000678 | negative regulation of transcription regulatory region DNA binding | PSEN1 | 0.0372468629636818 |
| GO:0010586 | BP | GO:0010586 | miRNA metabolic process | FGF2,HRAS | 0.0376212872989897 |
| GO:0032602 | BP | GO:0032602 | chemokine production | TLR4,TLR9 | 0.0376212872989897 |
| GO:0097305 | BP | GO:0097305 | response to alcohol | CES1,PRKCE,GLRA2 | 0.0378738741788984 |
| GO:0005172 | MF | GO:0005172 | vascular endothelial growth factor receptor binding | VEGFA | 0.0379868700940101 |
| GO:0017081 | MF | GO:0017081 | chloride channel regulator activity | TRPV1 | 0.0379868700940101 |
| GO:0045028 | MF | GO:0045028 | G protein-coupled purinergic nucleotide receptor activity | P2RY2 | 0.0379868700940101 |
| GO:0098691 | CC | GO:0098691 | dopaminergic synapse | ADRA2A | 0.0380444646037796 |
| GO:0002758 | BP | GO:0002758 | innate immune response-activating signaling pathway | TLR4,PRKCE,TLR9 | 0.038247662635855 |
| GO:0003015 | BP | GO:0003015 | heart process | TRPV1,ADRA1A,KCNH2 | 0.038247662635855 |
| GO:0032963 | BP | GO:0032963 | collagen metabolic process | MMP8,MMP2 | 0.0382744559651367 |
| GO:1901890 | BP | GO:1901890 | positive regulation of cell junction assembly | KDR,VEGFA | 0.0382744559651367 |
| GO:0044853 | CC | GO:0044853 | plasma membrane raft | ADRA1A,HTR2A | 0.0384684381076359 |
| GO:0001921 | BP | GO:0001921 | positive regulation of receptor recycling | PSEN1 | 0.0400549142198195 |
| GO:0001976 | BP | GO:0001976 | nervous system process involved in regulation of systemic arterial blood pressure | ADRA1A | 0.0400549142198195 |
| GO:0002031 | BP | GO:0002031 | G protein-coupled receptor internalization | HTR2B | 0.0400549142198195 |
| GO:0006287 | BP | GO:0006287 | base-excision repair, gap-filling | LIG1 | 0.0400549142198195 |
| GO:0032621 | BP | GO:0032621 | interleukin-18 production | TLR9 | 0.0400549142198195 |
| GO:0032661 | BP | GO:0032661 | regulation of interleukin-18 production | TLR9 | 0.0400549142198195 |
| GO:0035641 | BP | GO:0035641 | locomotory exploration behavior | PRKCE | 0.0400549142198195 |
| GO:0045348 | BP | GO:0045348 | positive regulation of MHC class II biosynthetic process | TLR4 | 0.0400549142198195 |
| GO:0045989 | BP | GO:0045989 | positive regulation of striated muscle contraction | ADRA1A | 0.0400549142198195 |
| GO:0050930 | BP | GO:0050930 | induction of positive chemotaxis | VEGFA | 0.0400549142198195 |
| GO:0060837 | BP | GO:0060837 | blood vessel endothelial cell differentiation | KDR | 0.0400549142198195 |
| GO:0070141 | BP | GO:0070141 | response to UV-A | MMP2 | 0.0400549142198195 |
| GO:0097531 | BP | GO:0097531 | mast cell migration | VEGFA | 0.0400549142198195 |
| GO:0106070 | BP | GO:0106070 | regulation of adenylate cyclase-activating G protein-coupled receptor signaling pathway | SSTR4 | 0.0400549142198195 |
| GO:0140052 | BP | GO:0140052 | cellular response to oxidised low-density lipoprotein particle stimulus | TLR4 | 0.0400549142198195 |
| GO:1903265 | BP | GO:1903265 | positive regulation of tumor necrosis factor-mediated signaling pathway | MMP8 | 0.0400549142198195 |
| GO:2000650 | BP | GO:2000650 | negative regulation of sodium ion transmembrane transporter activity | PRKCE | 0.0400549142198195 |
| GO:0010720 | BP | GO:0010720 | positive regulation of cell development | VEGFA,PPP1CC,FGF2,TLR9 | 0.0402566658912941 |
| GO:0006766 | BP | GO:0006766 | vitamin metabolic process | GC,RBP2 | 0.0402599913970498 |
| GO:0046822 | BP | GO:0046822 | regulation of nucleocytoplasmic transport | PSEN1,PPP1CC | 0.0402599913970498 |
| GO:0030673 | CC | GO:0030673 | axolemma | ADORA2A | 0.0407068817961502 |
| GO:0032591 | CC | GO:0032591 | dendritic spine membrane | TRPV1 | 0.0407068817961502 |
| GO:0035253 | CC | GO:0035253 | ciliary rootlet | PSEN1 | 0.0407068817961502 |
| GO:0005161 | MF | GO:0005161 | platelet-derived growth factor receptor binding | VEGFA | 0.0408495396901165 |
| GO:0005237 | MF | GO:0005237 | inhibitory extracellular ligand-gated monoatomic ion channel activity | GLRA2 | 0.0408495396901165 |
| GO:0001708 | BP | GO:0001708 | cell fate specification | PSEN1,FGF2 | 0.0409304136883605 |
| GO:0010469 | BP | GO:0010469 | regulation of signaling receptor activity | ADRA2A,ADRA2C | 0.0409304136883605 |
| GO:0014013 | BP | GO:0014013 | regulation of gliogenesis | KDM4A,PPP1CC | 0.0409304136883605 |
| GO:1905954 | BP | GO:1905954 | positive regulation of lipid localization | CES1,SSTR4 | 0.0416050752161037 |
| GO:0003007 | BP | GO:0003007 | heart morphogenesis | PSEN1,VEGFA,HTR2B | 0.0416971166634486 |
| GO:0014706 | BP | GO:0014706 | striated muscle tissue development | VEGFA,FGF2,ADRA1A | 0.0416971166634486 |
| GO:0046873 | MF | GO:0046873 | metal ion transmembrane transporter activity | PSEN1,TRPV1,KCNH2,SLC5A2 | 0.0419224968673608 |
| GO:0030203 | BP | GO:0030203 | glycosaminoglycan metabolic process | FGF2,HPSE | 0.0422839465737134 |
| GO:0004222 | MF | GO:0004222 | metalloendopeptidase activity | MMP8,MMP2 | 0.0424320492007647 |
| GO:0099094 | MF | GO:0099094 | ligand-gated monoatomic cation channel activity | TRPV1,KCNH2 | 0.0424320492007647 |
| GO:0005216 | MF | GO:0005216 | monoatomic ion channel activity | PSEN1,TRPV1,KCNH2,GLRA2 | 0.0425076973775279 |
| GO:0006271 | BP | GO:0006271 | DNA strand elongation involved in DNA replication | LIG1 | 0.0428549237508927 |
| GO:0007567 | BP | GO:0007567 | parturition | MMP2 | 0.0428549237508927 |
| GO:0009071 | BP | GO:0009071 | serine family amino acid catabolic process | DAO | 0.0428549237508927 |
| GO:0010763 | BP | GO:0010763 | positive regulation of fibroblast migration | PRKCE | 0.0428549237508927 |
| GO:0030728 | BP | GO:0030728 | ovulation | MMP2 | 0.0428549237508927 |
| GO:0031000 | BP | GO:0031000 | response to caffeine | ADORA2A | 0.0428549237508927 |
| GO:0032725 | BP | GO:0032725 | positive regulation of granulocyte macrophage colony-stimulating factor production | TLR9 | 0.0428549237508927 |
| GO:0045187 | BP | GO:0045187 | regulation of circadian sleep/wake cycle, sleep | ADORA2A | 0.0428549237508927 |
| GO:0050966 | BP | GO:0050966 | detection of mechanical stimulus involved in sensory perception of pain | HTR2A | 0.0428549237508927 |
| GO:0051791 | BP | GO:0051791 | medium-chain fatty acid metabolic process | CES1 | 0.0428549237508927 |
| GO:0070424 | BP | GO:0070424 | regulation of nucleotide-binding oligomerization domain containing signaling pathway | TLR4 | 0.0428549237508927 |
| GO:0090205 | BP | GO:0090205 | positive regulation of cholesterol metabolic process | CES1 | 0.0428549237508927 |
| GO:1900029 | BP | GO:1900029 | positive regulation of ruffle assembly | HRAS | 0.0428549237508927 |
| GO:1902306 | BP | GO:1902306 | negative regulation of sodium ion transmembrane transport | PRKCE | 0.0428549237508927 |
| GO:1904251 | BP | GO:1904251 | regulation of bile acid metabolic process | CES1 | 0.0428549237508927 |
| GO:1904936 | BP | GO:1904936 | interneuron migration | DRD1 | 0.0428549237508927 |
| GO:0009063 | BP | GO:0009063 | amino acid catabolic process | DDO,DAO | 0.04296699848446 |
| GO:1901222 | BP | GO:1901222 | regulation of non-canonical NF-kappaB signal transduction | TLR4,TLR9 | 0.04296699848446 |
| GO:0009925 | CC | GO:0009925 | basal plasma membrane | ADRA2A,TLR9,CA9 | 0.0431292486848468 |
| GO:0018958 | BP | GO:0018958 | phenol-containing compound metabolic process | DAO,DRD1 | 0.0436542018009657 |
| GO:0042752 | BP | GO:0042752 | regulation of circadian rhythm | PPP1CC,ADORA2A | 0.0436542018009657 |
| GO:0004698 | MF | GO:0004698 | calcium-dependent protein kinase C activity | PRKCE | 0.0437038452477961 |
| GO:0005521 | MF | GO:0005521 | lamin binding | PPP1CC | 0.0437038452477961 |
| GO:0086008 | MF | GO:0086008 | voltage-gated potassium channel activity involved in cardiac muscle cell action potential repolarization | KCNH2 | 0.0437038452477961 |
| GO:0032409 | BP | GO:0032409 | regulation of transporter activity | PRKCE,ADRA2A,TLR9 | 0.044485540206921 |
| GO:0005774 | CC | GO:0005774 | vacuolar membrane | PSEN1,NCSTN,TLR9,HPSE | 0.0446615746757101 |
| GO:0015908 | BP | GO:0015908 | fatty acid transport | RBP2,SSTR4 | 0.045040946705609 |
| GO:0006266 | BP | GO:0006266 | DNA ligation | LIG1 | 0.0456469141615904 |
| GO:0010958 | BP | GO:0010958 | regulation of amino acid import across plasma membrane | PSEN1 | 0.0456469141615904 |
| GO:0014857 | BP | GO:0014857 | regulation of skeletal muscle cell proliferation | FGF2 | 0.0456469141615904 |
| GO:0021534 | BP | GO:0021534 | cell proliferation in hindbrain | FGF2 | 0.0456469141615904 |
| GO:0021924 | BP | GO:0021924 | cell proliferation in external granule layer | FGF2 | 0.0456469141615904 |
| GO:0021930 | BP | GO:0021930 | cerebellar granule cell precursor proliferation | FGF2 | 0.0456469141615904 |
| GO:0021984 | BP | GO:0021984 | adenohypophysis development | FGF2 | 0.0456469141615904 |
| GO:0030214 | BP | GO:0030214 | hyaluronan catabolic process | FGF2 | 0.0456469141615904 |
| GO:0035435 | BP | GO:0035435 | phosphate ion transmembrane transport | VDR | 0.0456469141615904 |
| GO:0048712 | BP | GO:0048712 | negative regulation of astrocyte differentiation | KDM4A | 0.0456469141615904 |
| GO:0050802 | BP | GO:0050802 | circadian sleep/wake cycle, sleep | ADORA2A | 0.0456469141615904 |
| GO:0051044 | BP | GO:0051044 | positive regulation of membrane protein ectodomain proteolysis | ADRA2A | 0.0456469141615904 |
| GO:0060841 | BP | GO:0060841 | venous blood vessel development | VEGFA | 0.0456469141615904 |
| GO:0060856 | BP | GO:0060856 | establishment of blood-brain barrier | TRPV1 | 0.0456469141615904 |
| GO:0061101 | BP | GO:0061101 | neuroendocrine cell differentiation | FGF2 | 0.0456469141615904 |
| GO:0071380 | BP | GO:0071380 | cellular response to prostaglandin E stimulus | PRKCE | 0.0456469141615904 |
| GO:0098915 | BP | GO:0098915 | membrane repolarization during ventricular cardiac muscle cell action potential | KCNH2 | 0.0456469141615904 |
| GO:1902969 | BP | GO:1902969 | mitotic DNA replication | LIG1 | 0.0456469141615904 |
| GO:1903789 | BP | GO:1903789 | regulation of amino acid transmembrane transport | PSEN1 | 0.0456469141615904 |
| GO:2001212 | BP | GO:2001212 | regulation of vasculogenesis | KDR | 0.0456469141615904 |
| GO:1904659 | BP | GO:1904659 | glucose transmembrane transport | DRD1,SLC5A2 | 0.0457404306414146 |
| GO:0006090 | BP | GO:0006090 | pyruvate metabolic process | PSEN1,HTR2A | 0.0464439506773577 |
| GO:0043500 | BP | GO:0043500 | muscle adaptation | KDM4A,ADRA1A | 0.0464439506773577 |
| GO:0002218 | BP | GO:0002218 | activation of innate immune response | TLR4,PRKCE,TLR9 | 0.0465332884625196 |
| GO:0021537 | BP | GO:0021537 | telencephalon development | PSEN1,DRD1,HTR6 | 0.0465332884625196 |
| GO:0003953 | MF | GO:0003953 | NAD+ nucleosidase activity | TLR4 | 0.046549810753525 |
| GO:0004697 | MF | GO:0004697 | protein kinase C activity | PRKCE | 0.046549810753525 |
| GO:0005402 | MF | GO:0005402 | carbohydrate:monoatomic cation symporter activity | SLC5A2 | 0.046549810753525 |
| GO:0019841 | MF | GO:0019841 | retinol binding | RBP2 | 0.046549810753525 |
| GO:0045125 | MF | GO:0045125 | bioactive lipid receptor activity | LPAR2 | 0.046549810753525 |
| GO:0050135 | MF | GO:0050135 | NAD(P)+ nucleosidase activity | TLR4 | 0.046549810753525 |
| GO:0061809 | MF | GO:0061809 | NAD+ nucleotidase, cyclic ADP-ribose generating | TLR4 | 0.046549810753525 |
| GO:0090596 | BP | GO:0090596 | sensory organ morphogenesis | KDR,VEGFA,FGF2 | 0.046948405965968 |
| GO:0009308 | BP | GO:0009308 | amine metabolic process | DAO,DRD1 | 0.0471514783056121 |
| GO:0030246 | MF | GO:0030246 | carbohydrate binding | P4HTM,MGAM,SI | 0.0475778956674373 |
| GO:0001894 | BP | GO:0001894 | tissue homeostasis | TLR4,VEGFA,TLR9 | 0.0477841870315632 |
| GO:0060249 | BP | GO:0060249 | anatomical structure homeostasis | TLR4,VEGFA,TLR9 | 0.0477841870315632 |
| GO:0002718 | BP | GO:0002718 | regulation of cytokine production involved in immune response | TLR4,TLR9 | 0.047862985144831 |
| GO:0008645 | BP | GO:0008645 | hexose transmembrane transport | DRD1,SLC5A2 | 0.047862985144831 |
| GO:0072009 | BP | GO:0072009 | nephron epithelium development | VEGFA,FGF2 | 0.047862985144831 |
| GO:0001956 | BP | GO:0001956 | positive regulation of neurotransmitter secretion | ADORA2A | 0.0484309079942576 |
| GO:0007000 | BP | GO:0007000 | nucleolus organization | PHF8 | 0.0484309079942576 |
| GO:0007252 | BP | GO:0007252 | I-kappaB phosphorylation | TLR4 | 0.0484309079942576 |
| GO:0009068 | BP | GO:0009068 | aspartate family amino acid catabolic process | DDO | 0.0484309079942576 |
| GO:0009886 | BP | GO:0009886 | post-embryonic animal morphogenesis | KDR | 0.0484309079942576 |
| GO:0014841 | BP | GO:0014841 | skeletal muscle satellite cell proliferation | FGF2 | 0.0484309079942576 |
| GO:0030202 | BP | GO:0030202 | heparin metabolic process | HPSE | 0.0484309079942576 |
| GO:0031649 | BP | GO:0031649 | heat generation | TRPV1 | 0.0484309079942576 |
| GO:0032780 | BP | GO:0032780 | negative regulation of ATP-dependent activity | TLR9 | 0.0484309079942576 |
| GO:0036005 | BP | GO:0036005 | response to macrophage colony-stimulating factor | TLR4 | 0.0484309079942576 |
| GO:0060080 | BP | GO:0060080 | inhibitory postsynaptic potential | ADORA2A | 0.0484309079942576 |
| GO:0060644 | BP | GO:0060644 | mammary gland epithelial cell differentiation | FGF2 | 0.0484309079942576 |
| GO:0071468 | BP | GO:0071468 | cellular response to acidic pH | TRPV1 | 0.0484309079942576 |
| GO:0090494 | BP | GO:0090494 | dopamine uptake | DRD1 | 0.0484309079942576 |
| GO:0098712 | BP | GO:0098712 | L-glutamate import across plasma membrane | PSEN1 | 0.0484309079942576 |
| GO:1901163 | BP | GO:1901163 | regulation of trophoblast cell migration | VEGFA | 0.0484309079942576 |
| GO:1901522 | BP | GO:1901522 | positive regulation of transcription from RNA polymerase II promoter involved in cellular response to chemical stimulus | VEGFA | 0.0484309079942576 |
| GO:1901550 | BP | GO:1901550 | regulation of endothelial cell development | VEGFA | 0.0484309079942576 |
| GO:1903140 | BP | GO:1903140 | regulation of establishment of endothelial barrier | VEGFA | 0.0484309079942576 |
| GO:1905906 | BP | GO:1905906 | regulation of amyloid fibril formation | PSEN1 | 0.0484309079942576 |
| GO:0006022 | BP | GO:0006022 | aminoglycan metabolic process | FGF2,HPSE | 0.0485784429396747 |
| GO:0045471 | BP | GO:0045471 | response to ethanol | PRKCE,GLRA2 | 0.0485784429396747 |
| GO:0002367 | BP | GO:0002367 | cytokine production involved in immune response | TLR4,TLR9 | 0.049297823560339 |
| GO:0022612 | BP | GO:0022612 | gland morphogenesis | VDR,MMP2 | 0.049297823560339 |
| GO:0004659 | MF | GO:0004659 | prenyltransferase activity | FDFT1 | 0.0493874601262823 |
| GO:0005149 | MF | GO:0005149 | interleukin-1 receptor binding | TLR9 | 0.0493874601262823 |
| GO:0046965 | MF | GO:0046965 | nuclear retinoid X receptor binding | VDR | 0.0493874601262823 |
| GO:0043542 | BP | GO:0043542 | endothelial cell migration | KDR,VEGFA,FGF2 | 0.0499058599175091 |

**SUPPLEMENTARY TABLE 4 A list of 38 KEGG pathways**

| category | subcategory | ID | Description | pvalue | p.adjust | qvalue | geneID | Count |
| --- | --- | --- | --- | --- | --- | --- | --- | --- |
| Environmental Information Processing | Signaling molecules and interaction | hsa04080 | Neuroactive ligand-receptor interaction | 2.02465721247939e-12 | 3.38117754484058e-10 | 2.74927137273517e-10 | LPAR2/SSTR1/HTR2B/TRPV1/P2RY2/ADORA2A/ADRA1A/HTR2A/ADRA2A/SSTR2/DRD1/ADRA2C/HTR6/MLNR/SSTR4/GLRA2/HTR2C | 17 |
| Environmental Information Processing | Signal transduction | hsa04020 | Calcium signaling pathway | 6.46846037464522e-07 | 4.30322651581925e-05 | 3.49899918399422e-05 | KDR/VEGFA/HTR2B/ADORA2A/FGF2/ADRA1A/HTR2A/DRD1/HTR6/HTR2C | 10 |
| Organismal Systems | Sensory system | hsa04750 | Inflammatory mediator regulation of TRP channels | 7.73034703440583e-07 | 4.30322651581925e-05 | 3.49899918399422e-05 | HTR2B/PPP1CC/TRPV1/PRKCE/P2RY2/HTR2A/HTR2C | 7 |
| Metabolism | Energy metabolism | hsa00910 | Nitrogen metabolism | 1.58131362520225e-06 | 6.60198438521941e-05 | 5.36814362239712e-05 | CA4/CA9/CA1/CA7 | 4 |
| Human Diseases | Cancer: overview | hsa05205 | Proteoglycans in cancer | 1.01103226575291e-05 | 0.000337684776761473 | 0.000274575078488686 | TLR4/KDR/VEGFA/PPP1CC/FGF2/HRAS/HPSE/MMP2 | 8 |
| Cellular Processes | Cellular community - eukaryotes | hsa04540 | Gap junction | 0.000118388067532847 | 0.00329513454633091 | 0.00267930889679601 | HTR2B/HRAS/HTR2A/DRD1/HTR2C | 5 |
| Organismal Systems | Nervous system | hsa04726 | Serotonergic synapse | 0.000337335943813197 | 0.00804787180240056 | 0.00654381003788007 | HTR2B/HRAS/HTR2A/HTR6/HTR2C | 5 |
| Human Diseases | Drug resistance: antineoplastic | hsa01521 | EGFR tyrosine kinase inhibitor resistance | 0.000822712387267305 | 0.0154676933639008 | 0.0125769457544482 | KDR/VEGFA/FGF2/HRAS | 4 |
| Environmental Information Processing | Signal transduction | hsa04015 | Rap1 signaling pathway | 0.000833588265120404 | 0.0154676933639008 | 0.0125769457544482 | KDR/LPAR2/VEGFA/ADORA2A/FGF2/HRAS | 6 |
| Environmental Information Processing | Signal transduction | hsa04024 | cAMP signaling pathway | 0.00116219606973789 | 0.0180913778503021 | 0.014710291476136 | SSTR1/PPP1CC/ADORA2A/SSTR2/DRD1/HTR6 | 6 |
| Metabolism | Carbohydrate metabolism | hsa00500 | Starch and sucrose metabolism | 0.00120934326300275 | 0.0180913778503021 | 0.014710291476136 | MGAM/PYGM/SI | 3 |
| Human Diseases | Cancer: specific types | hsa05219 | Bladder cancer | 0.0012999792467283 | 0.0180913778503021 | 0.014710291476136 | VEGFA/HRAS/MMP2 | 3 |
| Environmental Information Processing | Signal transduction | hsa04022 | cGMP-PKG signaling pathway | 0.00177602374652567 | 0.0228150742822913 | 0.0185511792147216 | PPP1CC/PRKCE/ADRA1A/ADRA2A/ADRA2C | 5 |
| Human Diseases | Endocrine and metabolic disease | hsa04933 | AGE-RAGE signaling pathway in diabetic complications | 0.00195803901381583 | 0.0233566082362317 | 0.0189915062242287 | VEGFA/PRKCE/HRAS/MMP2 | 4 |
| Environmental Information Processing | Signal transduction | hsa04370 | VEGF signaling pathway | 0.00388917386554626 | 0.0432994690364151 | 0.0352072581512609 | KDR/VEGFA/HRAS | 3 |
| Human Diseases | Cancer: overview | hsa05207 | Chemical carcinogenesis - receptor activation | 0.00541039907722937 | 0.0532550158507655 | 0.0433022190025134 | VEGFA/ESR2/FGF2/HRAS/VDR | 5 |
| Organismal Systems | Circulatory system | hsa04270 | Vascular smooth muscle contraction | 0.00542116927822163 | 0.0532550158507655 | 0.0433022190025134 | PPP1CC/PRKCE/ADORA2A/ADRA1A | 4 |
| Environmental Information Processing | Signal transduction | hsa04151 | PI3K-Akt signaling pathway | 0.0117094377617767 | 0.103357928785488 | 0.0840414296459376 | TLR4/KDR/LPAR2/VEGFA/FGF2/HRAS | 6 |
| Human Diseases | Cancer: overview | hsa05235 | PD-L1 expression and PD-1 checkpoint pathway in cancer | 0.0119518484575641 | 0.103357928785488 | 0.0840414296459376 | TLR4/HRAS/TLR9 | 3 |
| Metabolism | Carbohydrate metabolism | hsa00052 | Galactose metabolism | 0.0123781950641304 | 0.103357928785488 | 0.0840414296459376 | MGAM/SI | 2 |
| Human Diseases | Drug resistance: antineoplastic | hsa01522 | Endocrine resistance | 0.0154373773287937 | 0.122763905424217 | 0.0998206353591173 | ESR2/HRAS/MMP2 | 3 |
| Human Diseases | Substance dependence | hsa05034 | Alcoholism | 0.0172899822695082 | 0.131246683591267 | 0.106718072381175 | PPP1CC/ADORA2A/HRAS/DRD1 | 4 |
| Human Diseases | Endocrine and metabolic disease | hsa04931 | Insulin resistance | 0.0199171265014846 | 0.144488046156459 | 0.117484764917637 | PPP1CC/PRKCE/PYGM | 3 |
| Environmental Information Processing | Signal transduction | hsa04010 | MAPK signaling pathway | 0.0207647491482336 | 0.144488046156459 | 0.117484764917637 | KDR/CDC25B/VEGFA/FGF2/HRAS | 5 |
| Cellular Processes | Cellular community - eukaryotes | hsa04510 | Focal adhesion | 0.0222446632828399 | 0.14859435072937 | 0.120823644778372 | KDR/VEGFA/PPP1CC/HRAS | 4 |
| Organismal Systems | Endocrine system | hsa04935 | Growth hormone synthesis, secretion and action | 0.0267075277844748 | 0.171544505384896 | 0.139484659279241 | SSTR1/HRAS/SSTR2 | 3 |
| Human Diseases | Infectious disease: parasitic | hsa05144 | Malaria | 0.0287814714889462 | 0.17801873106126 | 0.14474892093856 | TLR4/TLR9 | 2 |
| Organismal Systems | Digestive system | hsa04973 | Carbohydrate digestion and absorption | 0.0309471081856113 | 0.180994769657454 | 0.147168769529225 | MGAM/SI | 2 |
| Organismal Systems | Endocrine system | hsa04926 | Relaxin signaling pathway | 0.031430229461474 | 0.180994769657454 | 0.147168769529225 | VEGFA/HRAS/MMP2 | 3 |
| Cellular Processes | Cell motility | hsa04810 | Regulation of actin cytoskeleton | 0.0331787609819148 | 0.184695102799326 | 0.150177549707615 | LPAR2/PPP1CC/FGF2/HRAS | 4 |
| Organismal Systems | Endocrine system | hsa04910 | Insulin signaling pathway | 0.036564620784186 | 0.188432459107866 | 0.15321643381604 | PPP1CC/HRAS/PYGM | 3 |
| Environmental Information Processing | Signal transduction | hsa04014 | Ras signaling pathway | 0.0369309178014153 | 0.188432459107866 | 0.15321643381604 | KDR/VEGFA/FGF2/HRAS | 4 |
| Organismal Systems | Endocrine system | hsa04915 | Estrogen signaling pathway | 0.0372351565901771 | 0.188432459107866 | 0.15321643381604 | ESR2/HRAS/MMP2 | 3 |
| Human Diseases | Cardiovascular disease | hsa05418 | Fluid shear stress and atherosclerosis | 0.0385952717580768 | 0.189570893635259 | 0.154142107021421 | KDR/VEGFA/MMP2 | 3 |
| Environmental Information Processing | Signal transduction | hsa04330 | Notch signaling pathway | 0.0426872844706949 | 0.202043750383847 | 0.164283919316207 | PSEN1/NCSTN | 2 |
| Human Diseases | Cancer: specific types | hsa05224 | Breast cancer | 0.0435543414001108 | 0.202043750383847 | 0.164283919316207 | ESR2/FGF2/HRAS | 3 |
| Organismal Systems | Endocrine system | hsa04929 | GnRH secretion | 0.0464879084633877 | 0.209823803064479 | 0.170609962781707 | ESR2/HRAS | 2 |
| Organismal Systems | Nervous system | hsa04720 | Long-term potentiation | 0.0490886680333413 | 0.215731778 | 0.175413799897535 | PPP1CC/HRAS | 2 |

**SUPPLEMENTARY TABLE 5 The TFs predicted by key genes**

| Rank（ADRA2A） | Matrix | Transcription Factor | Link To Promotion DB | P-value |
| --- | --- | --- | --- | --- |
| 1 | TAXCREB_01 | Creb , Deltacreb | [ENSG00000150594](http://promotion.molgen.mpg.de/gb2/gbrowse/Human/?name=ENSG00000150594;plugin=Affinity;plugin_do=Find;Affinity.name_1=TAXCREB_01) | 6.99E-04 |
| 2 | NFKAPPAB50_01 | N/A | [ENSG00000150594](http://promotion.molgen.mpg.de/gb2/gbrowse/Human/?name=ENSG00000150594;plugin=Affinity;plugin_do=Find;Affinity.name_1=NFKAPPAB50_01) | 3.48E-03 |
| 3 | PAX4_01 | [Pax-4a](http://www.genecards.org/cgi-bin/carddisp.pl?gene=Pax-4a) | [ENSG00000150594](http://promotion.molgen.mpg.de/gb2/gbrowse/Human/?name=ENSG00000150594;plugin=Affinity;plugin_do=Find;Affinity.name_1=PAX4_01) | 6.62E-03 |
| 4 | ROAZ_01 | [Roaz](http://www.genecards.org/cgi-bin/carddisp.pl?gene=Roaz) | [ENSG00000150594](http://promotion.molgen.mpg.de/gb2/gbrowse/Human/?name=ENSG00000150594;plugin=Affinity;plugin_do=Find;Affinity.name_1=ROAZ_01) | 7.59E-03 |
| 5 | PIF3_02 | N/A | [ENSG00000150594](http://promotion.molgen.mpg.de/gb2/gbrowse/Human/?name=ENSG00000150594;plugin=Affinity;plugin_do=Find;Affinity.name_1=PIF3_02) | 1.23E-02 |
| 6 | ATF4_Q2 | Atf-4 , Atf4 | [ENSG00000150594](http://promotion.molgen.mpg.de/gb2/gbrowse/Human/?name=ENSG00000150594;plugin=Affinity;plugin_do=Find;Affinity.name_1=ATF4_Q2) | 1.30E-02 |
| 7 | PAX5_01 | [Pax-5](http://www.genecards.org/cgi-bin/carddisp.pl?gene=Pax-5) | [ENSG00000150594](http://promotion.molgen.mpg.de/gb2/gbrowse/Human/?name=ENSG00000150594;plugin=Affinity;plugin_do=Find;Affinity.name_1=PAX5_01) | 1.64E-02 |
| 8 | PHO4_01 | N/A | [ENSG00000150594](http://promotion.molgen.mpg.de/gb2/gbrowse/Human/?name=ENSG00000150594;plugin=Affinity;plugin_do=Find;Affinity.name_1=PHO4_01) | 1.65E-02 |
| 9 | HEB_Q6 | [Heb](http://www.genecards.org/cgi-bin/carddisp.pl?gene=Heb) | [ENSG00000150594](http://promotion.molgen.mpg.de/gb2/gbrowse/Human/?name=ENSG00000150594;plugin=Affinity;plugin_do=Find;Affinity.name_1=HEB_Q6) | 1.78E-02 |
| 10 | CREB_Q2 | [Creb](http://www.genecards.org/cgi-bin/carddisp.pl?gene=Creb) | [ENSG00000150594](http://promotion.molgen.mpg.de/gb2/gbrowse/Human/?name=ENSG00000150594;plugin=Affinity;plugin_do=Find;Affinity.name_1=CREB_Q2) | 1.91E-02 |
| 11 | CREB_Q4_01 | Creb , Crebbeta | [ENSG00000150594](http://promotion.molgen.mpg.de/gb2/gbrowse/Human/?name=ENSG00000150594;plugin=Affinity;plugin_do=Find;Affinity.name_1=CREB_Q4_01) | 1.93E-02 |
| 12 | NFKAPPAB_01 | [Rela](http://www.genecards.org/cgi-bin/carddisp.pl?gene=Rela) | [ENSG00000150594](http://promotion.molgen.mpg.de/gb2/gbrowse/Human/?name=ENSG00000150594;plugin=Affinity;plugin_do=Find;Affinity.name_1=NFKAPPAB_01) | 1.98E-02 |
| 13 | CREB_Q2_01 | Creb , Crebbeta | [ENSG00000150594](http://promotion.molgen.mpg.de/gb2/gbrowse/Human/?name=ENSG00000150594;plugin=Affinity;plugin_do=Find;Affinity.name_1=CREB_Q2_01) | 2.08E-02 |
| 14 | CREB_Q4 | [Creb](http://www.genecards.org/cgi-bin/carddisp.pl?gene=Creb) | [ENSG00000150594](http://promotion.molgen.mpg.de/gb2/gbrowse/Human/?name=ENSG00000150594;plugin=Affinity;plugin_do=Find;Affinity.name_1=CREB_Q4) | 2.14E-02 |
| 15 | AP4_01 | [Ap-4](http://www.genecards.org/cgi-bin/carddisp.pl?gene=Ap-4) | [ENSG00000150594](http://promotion.molgen.mpg.de/gb2/gbrowse/Human/?name=ENSG00000150594;plugin=Affinity;plugin_do=Find;Affinity.name_1=AP4_01) | 2.28E-02 |
| 16 | TTK69_01 | N/A | [ENSG00000150594](http://promotion.molgen.mpg.de/gb2/gbrowse/Human/?name=ENSG00000150594;plugin=Affinity;plugin_do=Find;Affinity.name_1=TTK69_01) | 2.31E-02 |
| 17 | AP2ALPHA_02 | [Ap-2alphaa](http://www.genecards.org/cgi-bin/carddisp.pl?gene=Ap-2alphaa) | [ENSG00000150594](http://promotion.molgen.mpg.de/gb2/gbrowse/Human/?name=ENSG00000150594;plugin=Affinity;plugin_do=Find;Affinity.name_1=AP2ALPHA_02) | 2.46E-02 |
| 18 | CF2II_02 | N/A | [ENSG00000150594](http://promotion.molgen.mpg.de/gb2/gbrowse/Human/?name=ENSG00000150594;plugin=Affinity;plugin_do=Find;Affinity.name_1=CF2II_02) | 2.56E-02 |
| 19 | E2F1DP2_01 | N/A | [ENSG00000150594](http://promotion.molgen.mpg.de/gb2/gbrowse/Human/?name=ENSG00000150594;plugin=Affinity;plugin_do=Find;Affinity.name_1=E2F1DP2_01) | 2.63E-02 |
| 20 | KROX_Q6 | Egr-1 , Egr-2 | [ENSG00000150594](http://promotion.molgen.mpg.de/gb2/gbrowse/Human/?name=ENSG00000150594;plugin=Affinity;plugin_do=Find;Affinity.name_1=KROX_Q6) | 3.20E-02 |
| 21 | E2F4DP2_01 | N/A | [ENSG00000150594](http://promotion.molgen.mpg.de/gb2/gbrowse/Human/?name=ENSG00000150594;plugin=Affinity;plugin_do=Find;Affinity.name_1=E2F4DP2_01) | 3.20E-02 |
| 22 | TAF1_01 | N/A | [ENSG00000150594](http://promotion.molgen.mpg.de/gb2/gbrowse/Human/?name=ENSG00000150594;plugin=Affinity;plugin_do=Find;Affinity.name_1=TAF1_01) | 3.23E-02 |
| 23 | STUAP_01 | N/A | [ENSG00000150594](http://promotion.molgen.mpg.de/gb2/gbrowse/Human/?name=ENSG00000150594;plugin=Affinity;plugin_do=Find;Affinity.name_1=STUAP_01) | 3.26E-02 |
| 24 | E2F1DP1_01 | N/A | [ENSG00000150594](http://promotion.molgen.mpg.de/gb2/gbrowse/Human/?name=ENSG00000150594;plugin=Affinity;plugin_do=Find;Affinity.name_1=E2F1DP1_01) | 3.32E-02 |
| 25 | CF2II_01 | N/A | [ENSG00000150594](http://promotion.molgen.mpg.de/gb2/gbrowse/Human/?name=ENSG00000150594;plugin=Affinity;plugin_do=Find;Affinity.name_1=CF2II_01) | 3.63E-02 |
| 26 | ATF_01 | N/A | [ENSG00000150594](http://promotion.molgen.mpg.de/gb2/gbrowse/Human/?name=ENSG00000150594;plugin=Affinity;plugin_do=Find;Affinity.name_1=ATF_01) | 3.72E-02 |
| 27 | FACBALL_Q2 | N/A | [ENSG00000150594](http://promotion.molgen.mpg.de/gb2/gbrowse/Human/?name=ENSG00000150594;plugin=Affinity;plugin_do=Find;Affinity.name_1=FACBALL_Q2) | 3.83E-02 |
| 28 | LAC9_C | N/A | [ENSG00000150594](http://promotion.molgen.mpg.de/gb2/gbrowse/Human/?name=ENSG00000150594;plugin=Affinity;plugin_do=Find;Affinity.name_1=LAC9_C) | 3.84E-02 |
| 29 | E47_01 | [E47](http://www.genecards.org/cgi-bin/carddisp.pl?gene=E47) | [ENSG00000150594](http://promotion.molgen.mpg.de/gb2/gbrowse/Human/?name=ENSG00000150594;plugin=Affinity;plugin_do=Find;Affinity.name_1=E47_01) | 3.88E-02 |
| 30 | MUSCLE_INI_B | N/A | [ENSG00000150594](http://promotion.molgen.mpg.de/gb2/gbrowse/Human/?name=ENSG00000150594;plugin=Affinity;plugin_do=Find;Affinity.name_1=MUSCLE_INI_B) | 3.88E-02 |
| 31 | LBP1_Q6 | N/A | [ENSG00000150594](http://promotion.molgen.mpg.de/gb2/gbrowse/Human/?name=ENSG00000150594;plugin=Affinity;plugin_do=Find;Affinity.name_1=LBP1_Q6) | 3.93E-02 |
| 32 | CREB_Q3 | Atf-1 , Atf-2 | [ENSG00000150594](http://promotion.molgen.mpg.de/gb2/gbrowse/Human/?name=ENSG00000150594;plugin=Affinity;plugin_do=Find;Affinity.name_1=CREB_Q3) | 4.10E-02 |
| 33 | E12_Q6 | [E12](http://www.genecards.org/cgi-bin/carddisp.pl?gene=E12) | [ENSG00000150594](http://promotion.molgen.mpg.de/gb2/gbrowse/Human/?name=ENSG00000150594;plugin=Affinity;plugin_do=Find;Affinity.name_1=E12_Q6) | 4.18E-02 |
| 34 | GBP_Q6 | N/A | [ENSG00000150594](http://promotion.molgen.mpg.de/gb2/gbrowse/Human/?name=ENSG00000150594;plugin=Affinity;plugin_do=Find;Affinity.name_1=GBP_Q6) | 4.21E-02 |
| 35 | NMYC_01 | [N-myc](http://www.genecards.org/cgi-bin/carddisp.pl?gene=N-myc) | [ENSG00000150594](http://promotion.molgen.mpg.de/gb2/gbrowse/Human/?name=ENSG00000150594;plugin=Affinity;plugin_do=Find;Affinity.name_1=NMYC_01) | 4.35E-02 |
| 36 | MINI20_B | N/A | [ENSG00000150594](http://promotion.molgen.mpg.de/gb2/gbrowse/Human/?name=ENSG00000150594;plugin=Affinity;plugin_do=Find;Affinity.name_1=MINI20_B) | 4.36E-02 |
| 37 | MIF1_01 | N/A | [ENSG00000150594](http://promotion.molgen.mpg.de/gb2/gbrowse/Human/?name=ENSG00000150594;plugin=Affinity;plugin_do=Find;Affinity.name_1=MIF1_01) | 4.40E-02 |
| 38 | MYC_Q2 | Max , Max1 | [ENSG00000150594](http://promotion.molgen.mpg.de/gb2/gbrowse/Human/?name=ENSG00000150594;plugin=Affinity;plugin_do=Find;Affinity.name_1=MYC_Q2) | 4.44E-02 |
| 39 | AP2_Q6 | Ap-2 , Ap-2alpha | [ENSG00000150594](http://promotion.molgen.mpg.de/gb2/gbrowse/Human/?name=ENSG00000150594;plugin=Affinity;plugin_do=Find;Affinity.name_1=AP2_Q6) | 4.51E-02 |
| 40 | MTATA_B | N/A | [ENSG00000150594](http://promotion.molgen.mpg.de/gb2/gbrowse/Human/?name=ENSG00000150594;plugin=Affinity;plugin_do=Find;Affinity.name_1=MTATA_B) | 4.55E-02 |
| 41 | CPRF2_Q2 | N/A | [ENSG00000150594](http://promotion.molgen.mpg.de/gb2/gbrowse/Human/?name=ENSG00000150594;plugin=Affinity;plugin_do=Find;Affinity.name_1=CPRF2_Q2) | 4.59E-02 |
| 42 | ABI4_01 | N/A | [ENSG00000150594](http://promotion.molgen.mpg.de/gb2/gbrowse/Human/?name=ENSG00000150594;plugin=Affinity;plugin_do=Find;Affinity.name_1=ABI4_01) | 4.81E-02 |
| 43 | VMYB_02 | [V-myb](http://www.genecards.org/cgi-bin/carddisp.pl?gene=V-myb) | [ENSG00000150594](http://promotion.molgen.mpg.de/gb2/gbrowse/Human/?name=ENSG00000150594;plugin=Affinity;plugin_do=Find;Affinity.name_1=VMYB_02) | 4.83E-02 |

| Rank（FGF2） | Matrix | Transcription Factor | Link To Promotion DB | P-value |
| --- | --- | --- | --- | --- |
| 1 | HAC1_Q2 | N/A | [ENSG00000138685](http://promotion.molgen.mpg.de/gb2/gbrowse/Human/?name=ENSG00000138685;plugin=Affinity;plugin_do=Find;Affinity.name_1=HAC1_Q2) | 5.84E-04 |
| 2 | QA1F_01 | N/A | [ENSG00000138685](http://promotion.molgen.mpg.de/gb2/gbrowse/Human/?name=ENSG00000138685;plugin=Affinity;plugin_do=Find;Affinity.name_1=QA1F_01) | 7.77E-04 |
| 3 | PDR3_Q2 | N/A | [ENSG00000138685](http://promotion.molgen.mpg.de/gb2/gbrowse/Human/?name=ENSG00000138685;plugin=Affinity;plugin_do=Find;Affinity.name_1=PDR3_Q2) | 7.38E-03 |
| 4 | DR3_Q4 | Car , Pxr-1 | [ENSG00000138685](http://promotion.molgen.mpg.de/gb2/gbrowse/Human/?name=ENSG00000138685;plugin=Affinity;plugin_do=Find;Affinity.name_1=DR3_Q4) | 1.08E-02 |
| 5 | XVENT1_01 | N/A | [ENSG00000138685](http://promotion.molgen.mpg.de/gb2/gbrowse/Human/?name=ENSG00000138685;plugin=Affinity;plugin_do=Find;Affinity.name_1=XVENT1_01) | 1.14E-02 |
| 6 | GBF_Q6 | N/A | [ENSG00000138685](http://promotion.molgen.mpg.de/gb2/gbrowse/Human/?name=ENSG00000138685;plugin=Affinity;plugin_do=Find;Affinity.name_1=GBF_Q6) | 2.02E-02 |
| 7 | DEAF1_01 | [Deaf-1](http://www.genecards.org/cgi-bin/carddisp.pl?gene=Deaf-1) | [ENSG00000138685](http://promotion.molgen.mpg.de/gb2/gbrowse/Human/?name=ENSG00000138685;plugin=Affinity;plugin_do=Find;Affinity.name_1=DEAF1_01) | 2.07E-02 |
| 8 | GLI_Q2 | Gli1 , Gli2alpha | [ENSG00000138685](http://promotion.molgen.mpg.de/gb2/gbrowse/Human/?name=ENSG00000138685;plugin=Affinity;plugin_do=Find;Affinity.name_1=GLI_Q2) | 2.18E-02 |
| 9 | NFKAPPAB50_01 | N/A | [ENSG00000138685](http://promotion.molgen.mpg.de/gb2/gbrowse/Human/?name=ENSG00000138685;plugin=Affinity;plugin_do=Find;Affinity.name_1=NFKAPPAB50_01) | 2.52E-02 |
| 10 | TRA1_02 | N/A | [ENSG00000138685](http://promotion.molgen.mpg.de/gb2/gbrowse/Human/?name=ENSG00000138685;plugin=Affinity;plugin_do=Find;Affinity.name_1=TRA1_02) | 3.25E-02 |
| 11 | HAP1_B | N/A | [ENSG00000138685](http://promotion.molgen.mpg.de/gb2/gbrowse/Human/?name=ENSG00000138685;plugin=Affinity;plugin_do=Find;Affinity.name_1=HAP1_B) | 3.65E-02 |
| 12 | CHCH_01 | [Chch](http://www.genecards.org/cgi-bin/carddisp.pl?gene=Chch) | [ENSG00000138685](http://promotion.molgen.mpg.de/gb2/gbrowse/Human/?name=ENSG00000138685;plugin=Affinity;plugin_do=Find;Affinity.name_1=CHCH_01) | 3.93E-02 |
| 13 | ABF1_03 | N/A | [ENSG00000138685](http://promotion.molgen.mpg.de/gb2/gbrowse/Human/?name=ENSG00000138685;plugin=Affinity;plugin_do=Find;Affinity.name_1=ABF1_03) | 3.95E-02 |
| 14 | ZF5_01 | [Zf5](http://www.genecards.org/cgi-bin/carddisp.pl?gene=Zf5) | [ENSG00000138685](http://promotion.molgen.mpg.de/gb2/gbrowse/Human/?name=ENSG00000138685;plugin=Affinity;plugin_do=Find;Affinity.name_1=ZF5_01) | 4.24E-02 |
| 15 | GATA2_01 | [Gata-2](http://www.genecards.org/cgi-bin/carddisp.pl?gene=Gata-2) | [ENSG00000138685](http://promotion.molgen.mpg.de/gb2/gbrowse/Human/?name=ENSG00000138685;plugin=Affinity;plugin_do=Find;Affinity.name_1=GATA2_01) | 4.25E-02 |
| 16 | TRAB1_Q2 | N/A | [ENSG00000138685](http://promotion.molgen.mpg.de/gb2/gbrowse/Human/?name=ENSG00000138685;plugin=Affinity;plugin_do=Find;Affinity.name_1=TRAB1_Q2) | 5.00E-02 |

| Rank（MMP2） | Matrix | Transcription Factor | Link To Promotion DB | P-value |
| --- | --- | --- | --- | --- |
| 1 | NF1_Q6 | [Nf-1](http://www.genecards.org/cgi-bin/carddisp.pl?gene=Nf-1) | [ENSG00000087245](http://promotion.molgen.mpg.de/gb2/gbrowse/Human/?name=ENSG00000087245;plugin=Affinity;plugin_do=Find;Affinity.name_1=NF1_Q6) | 3.83E-03 |
| 2 | UBX_01 | N/A | [ENSG00000087245](http://promotion.molgen.mpg.de/gb2/gbrowse/Human/?name=ENSG00000087245;plugin=Affinity;plugin_do=Find;Affinity.name_1=UBX_01) | 8.97E-03 |
| 3 | SREBP1_02 | Srebp-1 , Srebp-1a | [ENSG00000087245](http://promotion.molgen.mpg.de/gb2/gbrowse/Human/?name=ENSG00000087245;plugin=Affinity;plugin_do=Find;Affinity.name_1=SREBP1_02) | 9.05E-03 |
| 4 | HOX13_01 | [Hoxa5](http://www.genecards.org/cgi-bin/carddisp.pl?gene=Hoxa5) | [ENSG00000087245](http://promotion.molgen.mpg.de/gb2/gbrowse/Human/?name=ENSG00000087245;plugin=Affinity;plugin_do=Find;Affinity.name_1=HOX13_01) | 9.70E-03 |
| 5 | RP58_01 | [Rp58](http://www.genecards.org/cgi-bin/carddisp.pl?gene=Rp58) | [ENSG00000087245](http://promotion.molgen.mpg.de/gb2/gbrowse/Human/?name=ENSG00000087245;plugin=Affinity;plugin_do=Find;Affinity.name_1=RP58_01) | 9.98E-03 |
| 6 | TAXCREB_01 | Creb , Deltacreb | [ENSG00000087245](http://promotion.molgen.mpg.de/gb2/gbrowse/Human/?name=ENSG00000087245;plugin=Affinity;plugin_do=Find;Affinity.name_1=TAXCREB_01) | 1.06E-02 |
| 7 | BZIP910_01 | N/A | [ENSG00000087245](http://promotion.molgen.mpg.de/gb2/gbrowse/Human/?name=ENSG00000087245;plugin=Affinity;plugin_do=Find;Affinity.name_1=BZIP910_01) | 1.06E-02 |
| 8 | FOXO3_01 | [Foxo3](http://www.genecards.org/cgi-bin/carddisp.pl?gene=Foxo3) | [ENSG00000087245](http://promotion.molgen.mpg.de/gb2/gbrowse/Human/?name=ENSG00000087245;plugin=Affinity;plugin_do=Find;Affinity.name_1=FOXO3_01) | 1.21E-02 |
| 9 | DREF_Q3 | N/A | [ENSG00000087245](http://promotion.molgen.mpg.de/gb2/gbrowse/Human/?name=ENSG00000087245;plugin=Affinity;plugin_do=Find;Affinity.name_1=DREF_Q3) | 1.30E-02 |
| 10 | CEBP_C | [C/ebpalpha](http://www.genecards.org/cgi-bin/carddisp.pl?gene=C/ebpalpha) | [ENSG00000087245](http://promotion.molgen.mpg.de/gb2/gbrowse/Human/?name=ENSG00000087245;plugin=Affinity;plugin_do=Find;Affinity.name_1=CEBP_C) | 1.40E-02 |
| 11 | ANT_01 | N/A | [ENSG00000087245](http://promotion.molgen.mpg.de/gb2/gbrowse/Human/?name=ENSG00000087245;plugin=Affinity;plugin_do=Find;Affinity.name_1=ANT_01) | 1.49E-02 |
| 12 | E2F1_Q4_01 | Dp-1 , E2f-1 | [ENSG00000087245](http://promotion.molgen.mpg.de/gb2/gbrowse/Human/?name=ENSG00000087245;plugin=Affinity;plugin_do=Find;Affinity.name_1=E2F1_Q4_01) | 1.55E-02 |
| 13 | E2F_Q3_01 | Dp-1 , E2f-1 | [ENSG00000087245](http://promotion.molgen.mpg.de/gb2/gbrowse/Human/?name=ENSG00000087245;plugin=Affinity;plugin_do=Find;Affinity.name_1=E2F_Q3_01) | 1.57E-02 |
| 14 | IPF1_Q4_01 | [Ipf1](http://www.genecards.org/cgi-bin/carddisp.pl?gene=Ipf1) | [ENSG00000087245](http://promotion.molgen.mpg.de/gb2/gbrowse/Human/?name=ENSG00000087245;plugin=Affinity;plugin_do=Find;Affinity.name_1=IPF1_Q4_01) | 1.62E-02 |
| 15 | AGL1_02 | N/A | [ENSG00000087245](http://promotion.molgen.mpg.de/gb2/gbrowse/Human/?name=ENSG00000087245;plugin=Affinity;plugin_do=Find;Affinity.name_1=AGL1_02) | 2.08E-02 |
| 16 | E2F_Q4_01 | Dp-1 , E2f-1 | [ENSG00000087245](http://promotion.molgen.mpg.de/gb2/gbrowse/Human/?name=ENSG00000087245;plugin=Affinity;plugin_do=Find;Affinity.name_1=E2F_Q4_01) | 2.09E-02 |
| 17 | CDC5_01 | [Cdc5](http://www.genecards.org/cgi-bin/carddisp.pl?gene=Cdc5) | [ENSG00000087245](http://promotion.molgen.mpg.de/gb2/gbrowse/Human/?name=ENSG00000087245;plugin=Affinity;plugin_do=Find;Affinity.name_1=CDC5_01) | 2.39E-02 |
| 18 | GAL4_C | N/A | [ENSG00000087245](http://promotion.molgen.mpg.de/gb2/gbrowse/Human/?name=ENSG00000087245;plugin=Affinity;plugin_do=Find;Affinity.name_1=GAL4_C) | 2.47E-02 |
| 19 | ERR1_Q2 | [Err1](http://www.genecards.org/cgi-bin/carddisp.pl?gene=Err1) | [ENSG00000087245](http://promotion.molgen.mpg.de/gb2/gbrowse/Human/?name=ENSG00000087245;plugin=Affinity;plugin_do=Find;Affinity.name_1=ERR1_Q2) | 2.55E-02 |
| 20 | ADF1_Q6_01 | N/A | [ENSG00000087245](http://promotion.molgen.mpg.de/gb2/gbrowse/Human/?name=ENSG00000087245;plugin=Affinity;plugin_do=Find;Affinity.name_1=ADF1_Q6_01) | 2.66E-02 |
| 21 | CHX10_01 | [Chx10](http://www.genecards.org/cgi-bin/carddisp.pl?gene=Chx10) | [ENSG00000087245](http://promotion.molgen.mpg.de/gb2/gbrowse/Human/?name=ENSG00000087245;plugin=Affinity;plugin_do=Find;Affinity.name_1=CHX10_01) | 2.90E-02 |
| 22 | DAF16_01 | N/A | [ENSG00000087245](http://promotion.molgen.mpg.de/gb2/gbrowse/Human/?name=ENSG00000087245;plugin=Affinity;plugin_do=Find;Affinity.name_1=DAF16_01) | 2.90E-02 |
| 23 | SRF_C | [Srf](http://www.genecards.org/cgi-bin/carddisp.pl?gene=Srf) | [ENSG00000087245](http://promotion.molgen.mpg.de/gb2/gbrowse/Human/?name=ENSG00000087245;plugin=Affinity;plugin_do=Find;Affinity.name_1=SRF_C) | 3.09E-02 |
| 24 | NF1_Q6_01 | Ctf-1 , Ctf-2 | [ENSG00000087245](http://promotion.molgen.mpg.de/gb2/gbrowse/Human/?name=ENSG00000087245;plugin=Affinity;plugin_do=Find;Affinity.name_1=NF1_Q6_01) | 3.10E-02 |
| 25 | GAL4_01 | N/A | [ENSG00000087245](http://promotion.molgen.mpg.de/gb2/gbrowse/Human/?name=ENSG00000087245;plugin=Affinity;plugin_do=Find;Affinity.name_1=GAL4_01) | 3.20E-02 |
| 26 | E2F_Q6_01 | Dp-1 , E2f-1 | [ENSG00000087245](http://promotion.molgen.mpg.de/gb2/gbrowse/Human/?name=ENSG00000087245;plugin=Affinity;plugin_do=Find;Affinity.name_1=E2F_Q6_01) | 3.30E-02 |
| 27 | ADF1_Q6 | N/A | [ENSG00000087245](http://promotion.molgen.mpg.de/gb2/gbrowse/Human/?name=ENSG00000087245;plugin=Affinity;plugin_do=Find;Affinity.name_1=ADF1_Q6) | 3.32E-02 |
| 28 | TAL1ALPHAE47_01 | E47 , Tal-1alpha | [ENSG00000087245](http://promotion.molgen.mpg.de/gb2/gbrowse/Human/?name=ENSG00000087245;plugin=Affinity;plugin_do=Find;Affinity.name_1=TAL1ALPHAE47_01) | 3.67E-02 |
| 29 | FREAC4_01 | [Foxd1](http://www.genecards.org/cgi-bin/carddisp.pl?gene=Foxd1) | [ENSG00000087245](http://promotion.molgen.mpg.de/gb2/gbrowse/Human/?name=ENSG00000087245;plugin=Affinity;plugin_do=Find;Affinity.name_1=FREAC4_01) | 3.86E-02 |
| 30 | FOXO4_02 | [Foxo4](http://www.genecards.org/cgi-bin/carddisp.pl?gene=Foxo4) | [ENSG00000087245](http://promotion.molgen.mpg.de/gb2/gbrowse/Human/?name=ENSG00000087245;plugin=Affinity;plugin_do=Find;Affinity.name_1=FOXO4_02) | 3.89E-02 |
| 31 | E2F_Q4 | N/A | [ENSG00000087245](http://promotion.molgen.mpg.de/gb2/gbrowse/Human/?name=ENSG00000087245;plugin=Affinity;plugin_do=Find;Affinity.name_1=E2F_Q4) | 4.08E-02 |
| 32 | TAL1BETAE47_01 | E47 , Tal-1beta | [ENSG00000087245](http://promotion.molgen.mpg.de/gb2/gbrowse/Human/?name=ENSG00000087245;plugin=Affinity;plugin_do=Find;Affinity.name_1=TAL1BETAE47_01) | 4.18E-02 |
| 33 | ERF2_Q2_01 | N/A | [ENSG00000087245](http://promotion.molgen.mpg.de/gb2/gbrowse/Human/?name=ENSG00000087245;plugin=Affinity;plugin_do=Find;Affinity.name_1=ERF2_Q2_01) | 4.31E-02 |
| 34 | TAL1BETAITF2_01 | Itf-2 , Tal-1beta | [ENSG00000087245](http://promotion.molgen.mpg.de/gb2/gbrowse/Human/?name=ENSG00000087245;plugin=Affinity;plugin_do=Find;Affinity.name_1=TAL1BETAITF2_01) | 4.38E-02 |
| 35 | YY1_Q6 | [Yy1](http://www.genecards.org/cgi-bin/carddisp.pl?gene=Yy1) | [ENSG00000087245](http://promotion.molgen.mpg.de/gb2/gbrowse/Human/?name=ENSG00000087245;plugin=Affinity;plugin_do=Find;Affinity.name_1=YY1_Q6) | 4.48E-02 |
| 36 | MAZR_01 | [Mazr](http://www.genecards.org/cgi-bin/carddisp.pl?gene=Mazr) | [ENSG00000087245](http://promotion.molgen.mpg.de/gb2/gbrowse/Human/?name=ENSG00000087245;plugin=Affinity;plugin_do=Find;Affinity.name_1=MAZR_01) | 4.78E-02 |
| 37 | FOXO4_01 | [Foxo4](http://www.genecards.org/cgi-bin/carddisp.pl?gene=Foxo4) | [ENSG00000087245](http://promotion.molgen.mpg.de/gb2/gbrowse/Human/?name=ENSG00000087245;plugin=Affinity;plugin_do=Find;Affinity.name_1=FOXO4_01) | 4.87E-02 |

| Rank（TLR4） | Matrix | Transcription Factor | Link To Promotion DB | P-value |
| --- | --- | --- | --- | --- |
| 1 | DOF3_01 | N/A | [ENSG00000136869](http://promotion.molgen.mpg.de/gb2/gbrowse/Human/?name=ENSG00000136869;plugin=Affinity;plugin_do=Find;Affinity.name_1=DOF3_01) | 2.05E-03 |
| 2 | IRF_Q6 | Irf-1 , Irf-10 | [ENSG00000136869](http://promotion.molgen.mpg.de/gb2/gbrowse/Human/?name=ENSG00000136869;plugin=Affinity;plugin_do=Find;Affinity.name_1=IRF_Q6) | 2.49E-03 |
| 3 | PU1_Q6 | [Pu.1](http://www.genecards.org/cgi-bin/carddisp.pl?gene=Pu.1) | [ENSG00000136869](http://promotion.molgen.mpg.de/gb2/gbrowse/Human/?name=ENSG00000136869;plugin=Affinity;plugin_do=Find;Affinity.name_1=PU1_Q6) | 2.98E-03 |
| 4 | HSF_Q6 | [Hsf](http://www.genecards.org/cgi-bin/carddisp.pl?gene=Hsf) | [ENSG00000136869](http://promotion.molgen.mpg.de/gb2/gbrowse/Human/?name=ENSG00000136869;plugin=Affinity;plugin_do=Find;Affinity.name_1=HSF_Q6) | 3.50E-03 |
| 5 | FREAC2_01 | [Foxf2](http://www.genecards.org/cgi-bin/carddisp.pl?gene=Foxf2) | [ENSG00000136869](http://promotion.molgen.mpg.de/gb2/gbrowse/Human/?name=ENSG00000136869;plugin=Affinity;plugin_do=Find;Affinity.name_1=FREAC2_01) | 6.05E-03 |
| 6 | BACH2_01 | [Bach2](http://www.genecards.org/cgi-bin/carddisp.pl?gene=Bach2) | [ENSG00000136869](http://promotion.molgen.mpg.de/gb2/gbrowse/Human/?name=ENSG00000136869;plugin=Affinity;plugin_do=Find;Affinity.name_1=BACH2_01) | 7.41E-03 |
| 7 | VJUN_01 | [V-jun](http://www.genecards.org/cgi-bin/carddisp.pl?gene=V-jun) | [ENSG00000136869](http://promotion.molgen.mpg.de/gb2/gbrowse/Human/?name=ENSG00000136869;plugin=Affinity;plugin_do=Find;Affinity.name_1=VJUN_01) | 7.42E-03 |
| 8 | AP1_01 | Fosb , Fra-1 | [ENSG00000136869](http://promotion.molgen.mpg.de/gb2/gbrowse/Human/?name=ENSG00000136869;plugin=Affinity;plugin_do=Find;Affinity.name_1=AP1_01) | 1.09E-02 |
| 9 | AP1_Q6 | N/A | [ENSG00000136869](http://promotion.molgen.mpg.de/gb2/gbrowse/Human/?name=ENSG00000136869;plugin=Affinity;plugin_do=Find;Affinity.name_1=AP1_Q6) | 1.36E-02 |
| 10 | SRF_01 | [Srf](http://www.genecards.org/cgi-bin/carddisp.pl?gene=Srf) | [ENSG00000136869](http://promotion.molgen.mpg.de/gb2/gbrowse/Human/?name=ENSG00000136869;plugin=Affinity;plugin_do=Find;Affinity.name_1=SRF_01) | 1.58E-02 |
| 11 | HSF_01 | N/A | [ENSG00000136869](http://promotion.molgen.mpg.de/gb2/gbrowse/Human/?name=ENSG00000136869;plugin=Affinity;plugin_do=Find;Affinity.name_1=HSF_01) | 1.76E-02 |
| 12 | ELF1_Q6 | Elf-1 , Elf-1 | [ENSG00000136869](http://promotion.molgen.mpg.de/gb2/gbrowse/Human/?name=ENSG00000136869;plugin=Affinity;plugin_do=Find;Affinity.name_1=ELF1_Q6) | 1.94E-02 |
| 13 | AP4_01 | [Ap-4](http://www.genecards.org/cgi-bin/carddisp.pl?gene=Ap-4) | [ENSG00000136869](http://promotion.molgen.mpg.de/gb2/gbrowse/Human/?name=ENSG00000136869;plugin=Affinity;plugin_do=Find;Affinity.name_1=AP4_01) | 2.12E-02 |
| 14 | ETS_Q6 | Elf-1 , Elfr | [ENSG00000136869](http://promotion.molgen.mpg.de/gb2/gbrowse/Human/?name=ENSG00000136869;plugin=Affinity;plugin_do=Find;Affinity.name_1=ETS_Q6) | 2.55E-02 |
| 15 | SEF1_C | N/A | [ENSG00000136869](http://promotion.molgen.mpg.de/gb2/gbrowse/Human/?name=ENSG00000136869;plugin=Affinity;plugin_do=Find;Affinity.name_1=SEF1_C) | 2.61E-02 |
| 16 | HSF_04 | N/A | [ENSG00000136869](http://promotion.molgen.mpg.de/gb2/gbrowse/Human/?name=ENSG00000136869;plugin=Affinity;plugin_do=Find;Affinity.name_1=HSF_04) | 2.62E-02 |
| 17 | IRF_Q6_01 | Irf-1 , Irf-10 | [ENSG00000136869](http://promotion.molgen.mpg.de/gb2/gbrowse/Human/?name=ENSG00000136869;plugin=Affinity;plugin_do=Find;Affinity.name_1=IRF_Q6_01) | 2.77E-02 |
| 18 | DL_02 | N/A | [ENSG00000136869](http://promotion.molgen.mpg.de/gb2/gbrowse/Human/?name=ENSG00000136869;plugin=Affinity;plugin_do=Find;Affinity.name_1=DL_02) | 2.80E-02 |
| 19 | BRACH_01 | [Brachyury](http://www.genecards.org/cgi-bin/carddisp.pl?gene=Brachyury) | [ENSG00000136869](http://promotion.molgen.mpg.de/gb2/gbrowse/Human/?name=ENSG00000136869;plugin=Affinity;plugin_do=Find;Affinity.name_1=BRACH_01) | 2.95E-02 |
| 20 | HSF1_01 | Hsf1 , Hsf1long | [ENSG00000136869](http://promotion.molgen.mpg.de/gb2/gbrowse/Human/?name=ENSG00000136869;plugin=Affinity;plugin_do=Find;Affinity.name_1=HSF1_01) | 2.99E-02 |
| 21 | GAGAFACTOR_Q6 | N/A | [ENSG00000136869](http://promotion.molgen.mpg.de/gb2/gbrowse/Human/?name=ENSG00000136869;plugin=Affinity;plugin_do=Find;Affinity.name_1=GAGAFACTOR_Q6) | 3.07E-02 |
| 22 | AP1_Q2_01 | Fosb , Fra-1 | [ENSG00000136869](http://promotion.molgen.mpg.de/gb2/gbrowse/Human/?name=ENSG00000136869;plugin=Affinity;plugin_do=Find;Affinity.name_1=AP1_Q2_01) | 3.12E-02 |
| 23 | POU6F1_01 | [Pou6f1](http://www.genecards.org/cgi-bin/carddisp.pl?gene=Pou6f1) | [ENSG00000136869](http://promotion.molgen.mpg.de/gb2/gbrowse/Human/?name=ENSG00000136869;plugin=Affinity;plugin_do=Find;Affinity.name_1=POU6F1_01) | 3.55E-02 |
| 24 | HOX13_01 | [Hoxa5](http://www.genecards.org/cgi-bin/carddisp.pl?gene=Hoxa5) | [ENSG00000136869](http://promotion.molgen.mpg.de/gb2/gbrowse/Human/?name=ENSG00000136869;plugin=Affinity;plugin_do=Find;Affinity.name_1=HOX13_01) | 3.70E-02 |
| 25 | SUH_01 | N/A | [ENSG00000136869](http://promotion.molgen.mpg.de/gb2/gbrowse/Human/?name=ENSG00000136869;plugin=Affinity;plugin_do=Find;Affinity.name_1=SUH_01) | 3.75E-02 |
| 26 | MYB80_01 | N/A | [ENSG00000136869](http://promotion.molgen.mpg.de/gb2/gbrowse/Human/?name=ENSG00000136869;plugin=Affinity;plugin_do=Find;Affinity.name_1=MYB80_01) | 3.85E-02 |
| 27 | AP1_Q4 | N/A | [ENSG00000136869](http://promotion.molgen.mpg.de/gb2/gbrowse/Human/?name=ENSG00000136869;plugin=Affinity;plugin_do=Find;Affinity.name_1=AP1_Q4) | 4.09E-02 |
| 28 | ELK1_01 | [Elk-1](http://www.genecards.org/cgi-bin/carddisp.pl?gene=Elk-1) | [ENSG00000136869](http://promotion.molgen.mpg.de/gb2/gbrowse/Human/?name=ENSG00000136869;plugin=Affinity;plugin_do=Find;Affinity.name_1=ELK1_01) | 4.12E-02 |
| 29 | SMAD3_Q6 | [Smad3](http://www.genecards.org/cgi-bin/carddisp.pl?gene=Smad3) | [ENSG00000136869](http://promotion.molgen.mpg.de/gb2/gbrowse/Human/?name=ENSG00000136869;plugin=Affinity;plugin_do=Find;Affinity.name_1=SMAD3_Q6) | 4.26E-02 |
| 30 | CAP_01 | N/A | [ENSG00000136869](http://promotion.molgen.mpg.de/gb2/gbrowse/Human/?name=ENSG00000136869;plugin=Affinity;plugin_do=Find;Affinity.name_1=CAP_01) | 4.37E-02 |
| 31 | BACH1_01 | [Bach1](http://www.genecards.org/cgi-bin/carddisp.pl?gene=Bach1) | [ENSG00000136869](http://promotion.molgen.mpg.de/gb2/gbrowse/Human/?name=ENSG00000136869;plugin=Affinity;plugin_do=Find;Affinity.name_1=BACH1_01) | 4.43E-02 |
| 32 | HSF_02 | N/A | [ENSG00000136869](http://promotion.molgen.mpg.de/gb2/gbrowse/Human/?name=ENSG00000136869;plugin=Affinity;plugin_do=Find;Affinity.name_1=HSF_02) | 4.47E-02 |
| 33 | PAX2_02 | Pax-2 , Pax-2.1 | [ENSG00000136869](http://promotion.molgen.mpg.de/gb2/gbrowse/Human/?name=ENSG00000136869;plugin=Affinity;plugin_do=Find;Affinity.name_1=PAX2_02) | 4.47E-02 |
| 34 | AP1_Q2 | N/A | [ENSG00000136869](http://promotion.molgen.mpg.de/gb2/gbrowse/Human/?name=ENSG00000136869;plugin=Affinity;plugin_do=Find;Affinity.name_1=AP1_Q2) | 4.51E-02 |
| 35 | OVO_01 | N/A | [ENSG00000136869](http://promotion.molgen.mpg.de/gb2/gbrowse/Human/?name=ENSG00000136869;plugin=Affinity;plugin_do=Find;Affinity.name_1=OVO_01) | 4.54E-02 |
| 36 | HELIOSA_02 | [Helios](http://www.genecards.org/cgi-bin/carddisp.pl?gene=Helios) | [ENSG00000136869](http://promotion.molgen.mpg.de/gb2/gbrowse/Human/?name=ENSG00000136869;plugin=Affinity;plugin_do=Find;Affinity.name_1=HELIOSA_02) | 4.58E-02 |
| 37 | ICSBP_Q6 | [Irf-8](http://www.genecards.org/cgi-bin/carddisp.pl?gene=Irf-8) | [ENSG00000136869](http://promotion.molgen.mpg.de/gb2/gbrowse/Human/?name=ENSG00000136869;plugin=Affinity;plugin_do=Find;Affinity.name_1=ICSBP_Q6) | 4.62E-02 |
| 38 | GCR1_01 | N/A | [ENSG00000136869](http://promotion.molgen.mpg.de/gb2/gbrowse/Human/?name=ENSG00000136869;plugin=Affinity;plugin_do=Find;Affinity.name_1=GCR1_01) | 4.63E-02 |
| 39 | PPARA_01 | [Ppar-alpha](http://www.genecards.org/cgi-bin/carddisp.pl?gene=Ppar-alpha) | [ENSG00000136869](http://promotion.molgen.mpg.de/gb2/gbrowse/Human/?name=ENSG00000136869;plugin=Affinity;plugin_do=Find;Affinity.name_1=PPARA_01) | 4.64E-02 |
| 40 | NFAT_Q4_01 | Nf-at1 , Nf-at2 | [ENSG00000136869](http://promotion.molgen.mpg.de/gb2/gbrowse/Human/?name=ENSG00000136869;plugin=Affinity;plugin_do=Find;Affinity.name_1=NFAT_Q4_01) | 4.78E-02 |
| 41 | AP1_Q6_01 | Fosb , Fra-1 | [ENSG00000136869](http://promotion.molgen.mpg.de/gb2/gbrowse/Human/?name=ENSG00000136869;plugin=Affinity;plugin_do=Find;Affinity.name_1=AP1_Q6_01) | 4.81E-02 |

| Rank（HTR2A） | Matrix | Transcription Factor | Link To Promotion DB | P-value |
| --- | --- | --- | --- | --- |
| 1 | RSRFC4_01 | [Rsrfc4](http://www.genecards.org/cgi-bin/carddisp.pl?gene=Rsrfc4) | [ENSG00000102468](http://promotion.molgen.mpg.de/gb2/gbrowse/Human/?name=ENSG00000102468;plugin=Affinity;plugin_do=Find;Affinity.name_1=RSRFC4_01) | 2.25E-03 |
| 2 | PR_01 | N/A | [ENSG00000102468](http://promotion.molgen.mpg.de/gb2/gbrowse/Human/?name=ENSG00000102468;plugin=Affinity;plugin_do=Find;Affinity.name_1=PR_01) | 2.56E-03 |
| 3 | AR_03 | [Ar](http://www.genecards.org/cgi-bin/carddisp.pl?gene=Ar) | [ENSG00000102468](http://promotion.molgen.mpg.de/gb2/gbrowse/Human/?name=ENSG00000102468;plugin=Affinity;plugin_do=Find;Affinity.name_1=AR_03) | 2.66E-03 |
| 4 | GRE_C | Gr , Gr-alpha | [ENSG00000102468](http://promotion.molgen.mpg.de/gb2/gbrowse/Human/?name=ENSG00000102468;plugin=Affinity;plugin_do=Find;Affinity.name_1=GRE_C) | 5.06E-03 |
| 5 | AR_Q2 | [Ar](http://www.genecards.org/cgi-bin/carddisp.pl?gene=Ar) | [ENSG00000102468](http://promotion.molgen.mpg.de/gb2/gbrowse/Human/?name=ENSG00000102468;plugin=Affinity;plugin_do=Find;Affinity.name_1=AR_Q2) | 5.60E-03 |
| 6 | AR_02 | [Ar](http://www.genecards.org/cgi-bin/carddisp.pl?gene=Ar) | [ENSG00000102468](http://promotion.molgen.mpg.de/gb2/gbrowse/Human/?name=ENSG00000102468;plugin=Affinity;plugin_do=Find;Affinity.name_1=AR_02) | 6.32E-03 |
| 7 | GCR1_B | N/A | [ENSG00000102468](http://promotion.molgen.mpg.de/gb2/gbrowse/Human/?name=ENSG00000102468;plugin=Affinity;plugin_do=Find;Affinity.name_1=GCR1_B) | 6.42E-03 |
| 8 | ATHB9_01 | N/A | [ENSG00000102468](http://promotion.molgen.mpg.de/gb2/gbrowse/Human/?name=ENSG00000102468;plugin=Affinity;plugin_do=Find;Affinity.name_1=ATHB9_01) | 7.36E-03 |
| 9 | PR_02 | N/A | [ENSG00000102468](http://promotion.molgen.mpg.de/gb2/gbrowse/Human/?name=ENSG00000102468;plugin=Affinity;plugin_do=Find;Affinity.name_1=PR_02) | 8.41E-03 |
| 10 | FREAC4_01 | [Foxd1](http://www.genecards.org/cgi-bin/carddisp.pl?gene=Foxd1) | [ENSG00000102468](http://promotion.molgen.mpg.de/gb2/gbrowse/Human/?name=ENSG00000102468;plugin=Affinity;plugin_do=Find;Affinity.name_1=FREAC4_01) | 8.75E-03 |
| 11 | ELK1_01 | [Elk-1](http://www.genecards.org/cgi-bin/carddisp.pl?gene=Elk-1) | [ENSG00000102468](http://promotion.molgen.mpg.de/gb2/gbrowse/Human/?name=ENSG00000102468;plugin=Affinity;plugin_do=Find;Affinity.name_1=ELK1_01) | 9.06E-03 |
| 12 | AR_01 | [Ar](http://www.genecards.org/cgi-bin/carddisp.pl?gene=Ar) | [ENSG00000102468](http://promotion.molgen.mpg.de/gb2/gbrowse/Human/?name=ENSG00000102468;plugin=Affinity;plugin_do=Find;Affinity.name_1=AR_01) | 9.25E-03 |
| 13 | CDX2_Q5 | Cdx-2 , Cdx-3 | [ENSG00000102468](http://promotion.molgen.mpg.de/gb2/gbrowse/Human/?name=ENSG00000102468;plugin=Affinity;plugin_do=Find;Affinity.name_1=CDX2_Q5) | 1.23E-02 |
| 14 | AP4_01 | [Ap-4](http://www.genecards.org/cgi-bin/carddisp.pl?gene=Ap-4) | [ENSG00000102468](http://promotion.molgen.mpg.de/gb2/gbrowse/Human/?name=ENSG00000102468;plugin=Affinity;plugin_do=Find;Affinity.name_1=AP4_01) | 1.30E-02 |
| 15 | GR_01 | N/A | [ENSG00000102468](http://promotion.molgen.mpg.de/gb2/gbrowse/Human/?name=ENSG00000102468;plugin=Affinity;plugin_do=Find;Affinity.name_1=GR_01) | 1.44E-02 |
| 16 | MEF2_03 | Mef-2a , Amef-2 | [ENSG00000102468](http://promotion.molgen.mpg.de/gb2/gbrowse/Human/?name=ENSG00000102468;plugin=Affinity;plugin_do=Find;Affinity.name_1=MEF2_03) | 1.45E-02 |
| 17 | RSRFC4_Q2 | [Rsrfc4](http://www.genecards.org/cgi-bin/carddisp.pl?gene=Rsrfc4) | [ENSG00000102468](http://promotion.molgen.mpg.de/gb2/gbrowse/Human/?name=ENSG00000102468;plugin=Affinity;plugin_do=Find;Affinity.name_1=RSRFC4_Q2) | 1.77E-02 |
| 18 | SOX_Q6 | Sry , Sox10 | [ENSG00000102468](http://promotion.molgen.mpg.de/gb2/gbrowse/Human/?name=ENSG00000102468;plugin=Affinity;plugin_do=Find;Affinity.name_1=SOX_Q6) | 1.86E-02 |
| 19 | CAAT_C | N/A | [ENSG00000102468](http://promotion.molgen.mpg.de/gb2/gbrowse/Human/?name=ENSG00000102468;plugin=Affinity;plugin_do=Find;Affinity.name_1=CAAT_C) | 2.10E-02 |
| 20 | BZIP911_02 | N/A | [ENSG00000102468](http://promotion.molgen.mpg.de/gb2/gbrowse/Human/?name=ENSG00000102468;plugin=Affinity;plugin_do=Find;Affinity.name_1=BZIP911_02) | 2.12E-02 |
| 21 | LAC9_C | N/A | [ENSG00000102468](http://promotion.molgen.mpg.de/gb2/gbrowse/Human/?name=ENSG00000102468;plugin=Affinity;plugin_do=Find;Affinity.name_1=LAC9_C) | 2.45E-02 |
| 22 | MAT1MC_01 | N/A | [ENSG00000102468](http://promotion.molgen.mpg.de/gb2/gbrowse/Human/?name=ENSG00000102468;plugin=Affinity;plugin_do=Find;Affinity.name_1=MAT1MC_01) | 2.83E-02 |
| 23 | NKX61_01 | [Nkx6-1](http://www.genecards.org/cgi-bin/carddisp.pl?gene=Nkx6-1) | [ENSG00000102468](http://promotion.molgen.mpg.de/gb2/gbrowse/Human/?name=ENSG00000102468;plugin=Affinity;plugin_do=Find;Affinity.name_1=NKX61_01) | 3.55E-02 |
| 24 | NFKB_Q6 | N/A | [ENSG00000102468](http://promotion.molgen.mpg.de/gb2/gbrowse/Human/?name=ENSG00000102468;plugin=Affinity;plugin_do=Find;Affinity.name_1=NFKB_Q6) | 3.99E-02 |
| 25 | NFKB_C | N/A | [ENSG00000102468](http://promotion.molgen.mpg.de/gb2/gbrowse/Human/?name=ENSG00000102468;plugin=Affinity;plugin_do=Find;Affinity.name_1=NFKB_C) | 4.34E-02 |
| 26 | CETS1P54_02 | [C-ets-1](http://www.genecards.org/cgi-bin/carddisp.pl?gene=C-ets-1) | [ENSG00000102468](http://promotion.molgen.mpg.de/gb2/gbrowse/Human/?name=ENSG00000102468;plugin=Affinity;plugin_do=Find;Affinity.name_1=CETS1P54_02) | 4.53E-02 |
| 27 | FOXO4_02 | [Foxo4](http://www.genecards.org/cgi-bin/carddisp.pl?gene=Foxo4) | [ENSG00000102468](http://promotion.molgen.mpg.de/gb2/gbrowse/Human/?name=ENSG00000102468;plugin=Affinity;plugin_do=Find;Affinity.name_1=FOXO4_02) | 4.59E-02 |
| 28 | RAV1_01 | N/A | [ENSG00000102468](http://promotion.molgen.mpg.de/gb2/gbrowse/Human/?name=ENSG00000102468;plugin=Affinity;plugin_do=Find;Affinity.name_1=RAV1_01) | 4.79E-02 |
| 29 | TEIL_01 | N/A | [ENSG00000102468](http://promotion.molgen.mpg.de/gb2/gbrowse/Human/?name=ENSG00000102468;plugin=Affinity;plugin_do=Find;Affinity.name_1=TEIL_01) | 4.80E-02 |
| 30 | CEBP_C | [C/ebpalpha](http://www.genecards.org/cgi-bin/carddisp.pl?gene=C/ebpalpha) | [ENSG00000102468](http://promotion.molgen.mpg.de/gb2/gbrowse/Human/?name=ENSG00000102468;plugin=Affinity;plugin_do=Find;Affinity.name_1=CEBP_C) | 4.90E-02 |
| 31 | TGIF_01 | [Tgif](http://www.genecards.org/cgi-bin/carddisp.pl?gene=Tgif) |  |  |
