# Supplementary material
Source: Research Square preprint supplement (doi:10.21203/rs.3.rs-8597333/v1)
Supplement: Supplementary file 2 [file d3dec75c94b20cb0b819f3b6.doc]

**Table 1 List of primers**

| Primers | Sequence （5′-3′） |
| --- | --- |
| ADRA2A-F | AGCTGCAAGATCAACGACCA |
| ADRA2A-R | ACGCTTGGCGATCTGGTAAA |
| FGF2-F | GGCTGCTGGCTTCTAAGTGT |
| FGF2-R | GTCCCGTTTTGGATCCGAGT |
| MMP2-F | GCCCCCATGAAGCCTTGTTT |
| MMP2-R | TAGCGGTCTCGGGACAGAAT |
| TLR4-F | CACCAGGAAGCTTGAATCCCT |
| TLR4-R | ATCCAGCCACTGAAGTTCTGA |
| GAPDH-F | CCCTTAAGAGGGATGCTGCC |
| GAPDH-R | TACGGCCAAATCCGTTCACA |

**Table 2 Classification of Proteins and Key Genes.**

| **ID** | **Gene name** | **Gene ID** | **PANTHER family/subfamily** | **PANTHER protein class** |
| --- | --- | --- | --- | --- |
| ADRA2A | Alpha-2A adrenergic receptor | HUMAN|HGNC=281|UniProtKB=P08913 | ALPHA-2A ADRENERGIC RECEPTOR (PTHR24248:SF24) | G-protein coupled receptor |
| HTR2A | 5-hydroxytryptamine receptor 2A | HUMAN|HGNC=5293|UniProtKB=P28223 | 5-HYDROXYTRYPTAMINE RECEPTOR 2A (PTHR24247:SF30) | G-protein coupled receptor |
| FGF2 | Fibroblast growth factor 2 | HUMAN|HGNC=3676|UniProtKB=P09038 | FIBROBLAST GROWTH FACTOR 2 (PTHR11486:SF83) | growth factor |
| MMP2 | 72 kDa type IV collagenase | HUMAN|HGNC=7166|UniProtKB=P08253 | 72 KDA TYPE IV COLLAGENASE (PTHR10201:SF29) | metalloprotease |
| TLR4 | TLR4 interactor with leucine rich repeats | HUMAN|HGNC=22200|UniProtKB=Q7L0X0 | TLR4 INTERACTOR WITH LEUCINE RICH REPEATS (PTHR24373:SF307) | transmembrane signal receptor |

**Table 3 The basic physical and chemical properties of ADRA2A, HTR2A, FGF2, MMP2, and TLR4**

| Gene Property | ADRA2A | HTR2A | FGF2 | MMP2 | TLR4 |
| --- | --- | --- | --- | --- | --- |
| Formula | C2299H3600N636O624S16 | C2367H3742N602O688S30 | C1322H2149N447O384S10 | C3343H4973N861O979S31 | C3922H6287N1189O1118S23 |
| Molecular Weight | 50.65KD | 52.60KD | 30.77KD | 73.88KD | 88.72KD |
| Number of amino acids | 465AA | 471AA | 288AA | 660AA | 811AA |
| Theoretical pI | 9.75 | 7.83 | 11.18 | 5.26 | 9.70 |
| Alphatic Index | 86.88 | 101.83 | 56.67 | 61.09 | 93.45 |
| Grand average of hydropathicity | 0.012 | 0.221 | -0.748 | -0.446 | -0.245 |
| Estimated half-life | 30h | 30h | 30h | 30h | 30h |
| Instability index | 45.62 | 39.77 | 43.52 | 27.46 | 56.96 |

**Table 4 The degree of binding between key genes and their corresponding GLP**

|  | ADRA2A(1HLL) | HTR2A(7VOD) | KDR(1BAS) | MMP2(1CXW) | TLR4(2Z62) |
| --- | --- | --- | --- | --- | --- |
| glucose | -5.4 | -5.8 | -4.5 | / | / |
| galactose | -4.9 | -5.7 | -4.2 | -93.5 | -5.6 |
| mannose | -5.3 | -5.8 | -4.1 | / | / |
| xylose | -4.4 | -5.1 | -4.1 | / | -5.0 |
| arabinose | -4.6 | -5.2 | -3.8 | / | -5.1 |
| rhamnose | -4.5 | -5.4 | -4.3 | / | -5.3 |
| fucose | -4.6 | -5.4 | -4.0 | / | -5.2 |
| β-glucan | -7.8 | -9.1 | -5.4 | / | / |
